# Supplementary material for: Ligand-accelerated site-selective Csp2–H and Csp3–H alkynylations of alcohols via Pd(ii) catalysis
Source: Royal Society of Chemistry journal article supplement (doi:10.1039/d1qo01095f), 2021-01-01

## *Supporting Information*

### **Ligand Accelerated Site-Selective C–H Alkynylation of Alcohols via Pd(II) Catalysis**

**Aidong Huang, Yishen Han, Peiqing Wu, Yang Gao, YanpingHuo, Qian Chen,  
Xianwei Li\***

School of Chemical Engineering and Light Industry, Guangdong University of Technology,  
Guangzhou, 510006, China.

**E-mail: [xwli@gdut.edu.cn](mailto:xwli@gdut.edu.cn)**

#### **Table of Contents**

|                                                           |     |
|-----------------------------------------------------------|-----|
| <b>A. General information</b> -----                       | S2  |
| <b>B. General procedure</b> -----                         | S3  |
| <b>C. Synthetic applications</b> -----                    | S9  |
| <b>D. Analytical data for the obtained products</b> ----- | S14 |
| <b>E. References</b> -----                                | S33 |
| <b>F. NMR spectra</b> -----                               | S34 |

## A. General Information

$^1\text{H}$  and  $^{13}\text{C}$  NMR spectra were recorded on BRUKER DRX-400 spectrometer using  $\text{CDCl}_3$  as solvent and TMS as an internal standard. Chemical shifts for  $^1\text{H}$  NMR spectra are reported as  $\delta$  in units of parts per million (ppm) downfield from  $\text{SiMe}_4$  ( $\delta$  0.0) and relative to the signal of chloroform-d ( $\delta$  7.26, singlet). Multiplicities were given as: s (singlet); d (doublet); t (triplet); q (quartet); dd (doublets of doublet); dt (doublets of triplet); dq (doublets of quartet). Coupling constants are reported as a  $J$  value in Hz. Carbon nuclear magnetic resonance spectra ( $^{13}\text{C}$  NMR) are reported as  $\delta$  in units of parts per million (ppm) downfield from  $\text{SiMe}_4$  ( $\delta$  0.0) and relative to the signal of chloroform-d ( $\delta$  77.0, triplet). Gas chromatograph mass spectra were obtained with a SHIMADZU model GCMS-QP 5000 spectrometer. HRMS was carried out on a MAT 95XP (Thermo).

## B. General procedure:

### 1) General procedure for the synthesis of alcohol oximes **1, 4**:

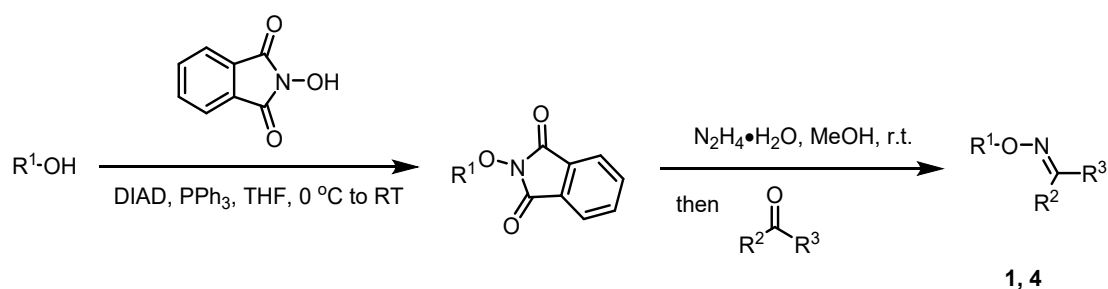

**Figure SI-1.** General procedure for the synthesis of alcohol oximes **1, 4**

To a solution of alcohol (5 mmol, 1.0 equiv), N-hydroxyphthalimide (978 mg, 6 mmol, 1.2 equiv) and  $\text{PPh}_3$  (1.572 g, 6 mmol, 1.2 equiv) in 20 mL THF was added diisopropyl azodicarboxylate (1.2 mL, 6 mmol, 1.2 equiv) dropwise at  $0\text{ }^\circ\text{C}$ . Then the reaction was allowed to warm to room temperature and stirred overnight. Upon done, the solvent was removed under reduced pressure. The residue was used for the second step without further purification.

To a solution of N-alkoxyphthalimide (1.1 equiv) in MeOH (5 mL/mmol) was added hydrazine monohydrate (1.15 equiv) at room temperature. The reaction was monitored by TLC and usually completed in 30 min. Then aldehyde or ketone (1.0 equiv) was added. The reaction was monitored by TLC. After 0.5 h the mixture was filtered to remove precipitate if formed and then the solvent was removed under reduced pressure. The residue was purified by flash column chromatography on silica gel to give the title compounds **1, 4**.

## 2) General procedure for the synthesis of alcohol oximes 9:

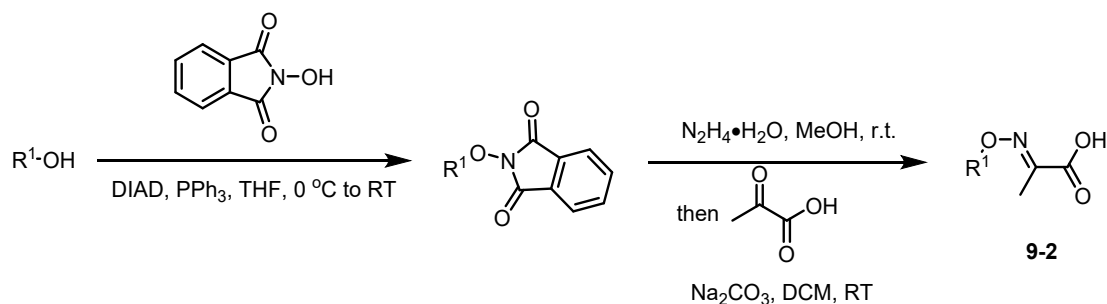

**Figure SI-2.** General procedure for the synthesis of alcohol oximes 9-2

To a solution of alcohol (10 mmol, 1.0 equiv.), N-hydroxyphthalimide (1.96 g, 12 mmol, 1.2 equiv.), PPh<sub>3</sub> (3.14 g, 12 mmol, 1.2 equiv.) in THF (50 mL) was added Diisopropyl azodicarboxylate (DIAD, 2.4 mL, 12 mmol, 1.2 equiv.) dropwise at 0 °C. Then the solution was allowed to stir at room temperature overnight. Upon completion, the mixture was concentrated under reduced pressure, then purified by flash column chromatography on silica gel to give the title compounds.

To a solution of N-alkoxyphthalimide (5 mmol, 2.5 equiv.) in MeOH (20 mL) was added hydrazine monohydrate (0.32 g, 5.4 mmol, 2.7 equiv., 85% w/w in water) at room temperature. The reaction was monitored by TLC and usually completed in 30 min. Then Na<sub>2</sub>CO<sub>3</sub> (0.64 g, 6 mmol, 3.0 equiv.), pyruvic acid (0.44 g, 5 mmol, 2.5 equiv.) was added to the mixture and stirred for 5 h at the same temperature. Upon completion, MeOH was removed by reduced pressure and CH<sub>2</sub>Cl<sub>2</sub> (15 mL) was added, filtered to remove the precipitate, then the filtrate was washed with CH<sub>2</sub>Cl<sub>2</sub> and water. The resulting mixture was treated with diluted HCl (1.0 mol/L), adjusted the pH to 4.0~5.0, and extracted with CH<sub>2</sub>Cl<sub>2</sub> (6×10 mL). The combined organic layer was dried over MgSO<sub>4</sub> and concentrated to provide the crude pyruvic acid oxime ether.

### 3) General procedure for the synthesis of alcohol oximes 9:

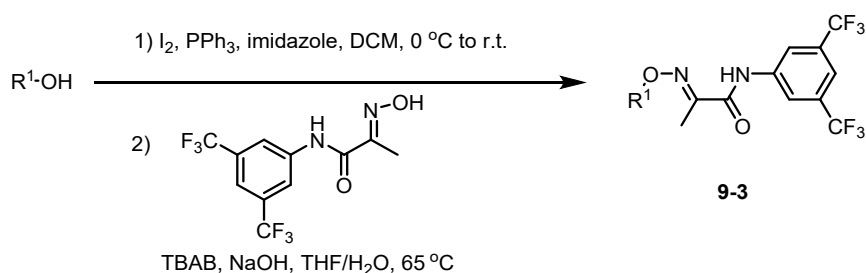

**Figure SI-3.** General procedure for the synthesis of alcohol oximes **9-3**

**Iodinate:** A 100 mL round bottom flask was charged with alcohol (10 mmol, 1.0 equiv.), PPh<sub>3</sub> (3.67 g, 14 mmol, 1.4 equiv.), imidazole (1.06 g, 15.5 mmol, 1.55 equiv.) and CH<sub>2</sub>Cl<sub>2</sub> (50 mL). To this stirring solution was added I<sub>2</sub> (3.81 g, 15 mmol, 1.5 equiv.) in one portion at 0 °C. The mixture was allowed to warm to room temperature and stirred for 3 h, then the solvent was evaporated to give a thick oil. This residue was triturated with n-hexane and the organic phase was washed with sat. Na<sub>2</sub>S<sub>2</sub>O<sub>3</sub>, dried by MgSO<sub>4</sub>, filtered and concentrated to afford the alkyl iodides as a colorless oil.

**Etherification:** A mixture of N-(2,4,6-trifluorophenyl)pyruvamide oxime (0.54 g, 2.0 mmol, 1.0 equiv.), tetrabutylammonium bromide (77.3 mg, 0.24 mmol), NaOH (0.12 g, 3.0 mmol, 1.5 equiv.), THF (14 mL) and H<sub>2</sub>O (7 mL) was heated to 65 °C. Then a solution of alkyl iodide (3 mmol, 1.5 equiv.) in THF (4 mL) was added dropwise, and the mixture was stirred for 3.5 h. Upon completion, the mixture was evaporated to leave the aqueous layer, which was extracted by CH<sub>2</sub>Cl<sub>2</sub> (3×15 mL). The organic layer was dried over anhydrous MgSO<sub>4</sub> and filtered. The filtrate was concentrated under reduced pressure to give a crude product, which was purified by flash column chromatography on silica gel using a mixture of petroleum ether (60~90 °C) and EtOAc as the eluent to give the target compounds.

#### 4) General procedure for the Pd(II)-Catalyzed C–H alkylation of alcohols:

##### With C–H alkylation of alcohols **1** to afford **3** as examples:

An oven-dried 10 mL Schlenk Tube was charged with **1** (0.2 mmol), PdCl<sub>2</sub> (0.01 mmol, 1.77 mg), N-Boc-L-Leu-OH (0.04 mmol, 9.2 mg), KNO<sub>3</sub> (0.06 mmol, 6.1 mg), Li<sub>2</sub>CO<sub>3</sub> (0.3 mmol, 22.2 mg) in sequence, followed by adding alkyne **2** (0.3 mmol) in DCE (1.0 mL) through syringe. The resulting reaction mixture was stirred at 100 °C for 12 h and then diluted with CH<sub>2</sub>Cl<sub>2</sub> and filtered through diatomite. Removing the solvent in vacuo and purification of the residue by silica gel column chromatography afforded the desired annulation product **3**.

#### 5) Investigation of reaction conditions:

##### 1) Table S1. Conditions optimization for aryl C–H alkylation.<sup>a</sup>

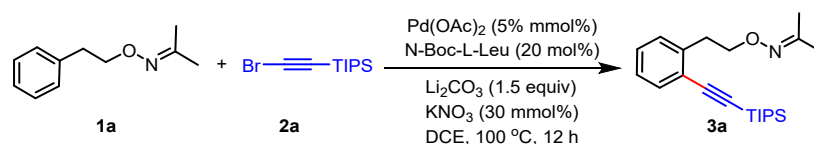

| Entry | Variation of standard conditions                                                  | Yield <sup>b</sup> (%) |
|-------|-----------------------------------------------------------------------------------|------------------------|
| 1     | None                                                                              | 78                     |
| 2     | NiCl <sub>2</sub> instead of PdCl <sub>2</sub>                                    | 15                     |
| 3     | [Ru( <i>p</i> -cymene)Cl <sub>2</sub> ] <sub>2</sub> instead of PdCl <sub>2</sub> | 36                     |
| 4     | [IrCp*Cl <sub>2</sub> ] <sub>2</sub> instead of PdCl <sub>2</sub>                 | 47                     |
| 5     | without PdCl <sub>2</sub>                                                         | n. p.                  |
| 6     | without N-Boc-L-Leu-OH                                                            | 39                     |
| 7     | without KNO <sub>3</sub>                                                          | 31                     |
| 8     | AgNO <sub>3</sub> instead of KNO <sub>3</sub>                                     | 78                     |
| 9     | LiOAc, Cs <sub>2</sub> CO <sub>3</sub> instead of Li <sub>2</sub> CO <sub>3</sub> | 62, 25                 |
| 10    | PivOH instead of Li <sub>2</sub> CO <sub>3</sub>                                  | < 10                   |
| 11    | N-Boc-L-Ala instead of N-Boc-L-Leu-OH                                             | 71                     |
| 12    | Ac-Phe-OH instead of N-Boc-L-Leu-OH                                               | 49                     |
| 13    | CH <sub>3</sub> CN, HFIP, toluene instead of DCE                                  | 52, 53, 62             |
| 14    | 40 °C, 60 °C, 120 °C                                                              | 37, 56, 75             |

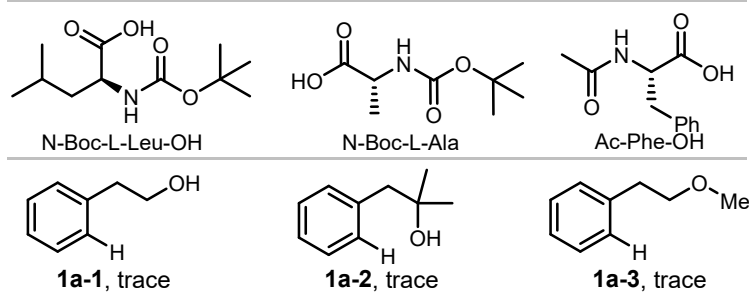

<sup>a</sup> Standard conditions: **1a** (0.2 mmol), **2a** (0.4 mmol), Pd(OAc)<sub>2</sub> (5 mol%), N-Boc-L-Leu-OH (20 mol%), Li<sub>2</sub>CO<sub>3</sub> (1.5 equiv.), KNO<sub>3</sub> (20 mol%), DCE (1 mL), 100 °C, 12 h. <sup>b</sup> Isolated yield.

## 2) Investigation of Csp<sup>3</sup>-H alkylation of aliphatic alcohols

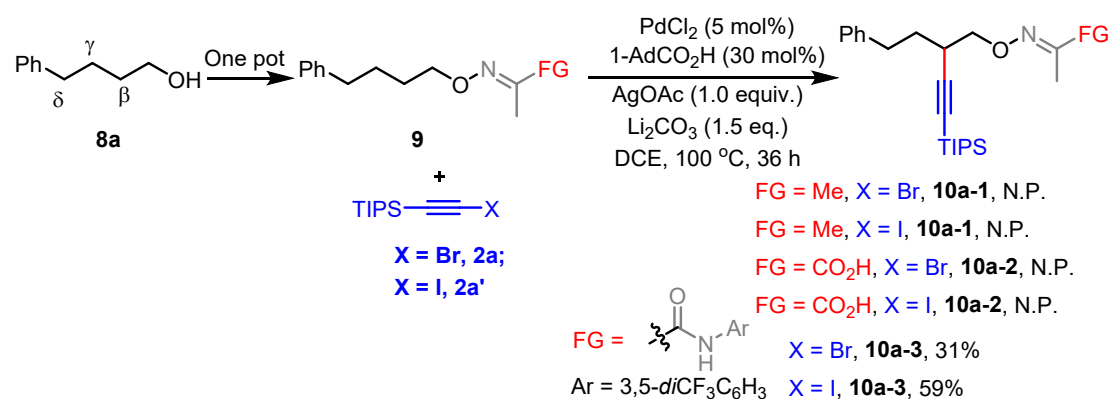

**Figure SI-4.** Amide-attached oximes enabled Csp<sup>3</sup>-H alkylation under Pd(II) catalysis

After extensive investigation of reaction conditions for Csp<sup>3</sup>-H alkylation of aliphatic alcohols under Pd(II) catalysis, we are grateful to find that with amide-attached oxime substrates, site-selective  $\beta$  Csp<sup>3</sup>-H alkylation of **8** was achieved. Further optimization revealed that the use of 1-AdCO<sub>2</sub>H enhanced the efficiency, it was speculated that 1-AdCO<sub>2</sub>H might enhance the formation of stronger electrophilic Pd(II) catalyst, and/or facilitate the product releasing step (*J. Am. Chem. Soc.* **2013**, *135*, 12135–12141. *Acc. Chem. Res.* **2013**, *47*, 281–295.).

## C. Synthetic applications

To further demonstrate the synthetic potential of this transformation, selective N–O reduction of the obtained products could be readily transformed to the corresponding alcohols (**3a-1**, **4a-1**), and subsequent desilylation or desilylation/Sonogashira reaction afforded to the terminal alkynes (**3a-2**, **4a-2**) and internal alkynes (**4a-3**, **5a-3**), proving complementary approach for alkyne delivery. Notably, *ortho* alkyne substituted aryl alcohols serve as versatile synthons for concise delivery of 6 and 7-membered oxygen heterocycles (**3a-4**, **5a-4**).

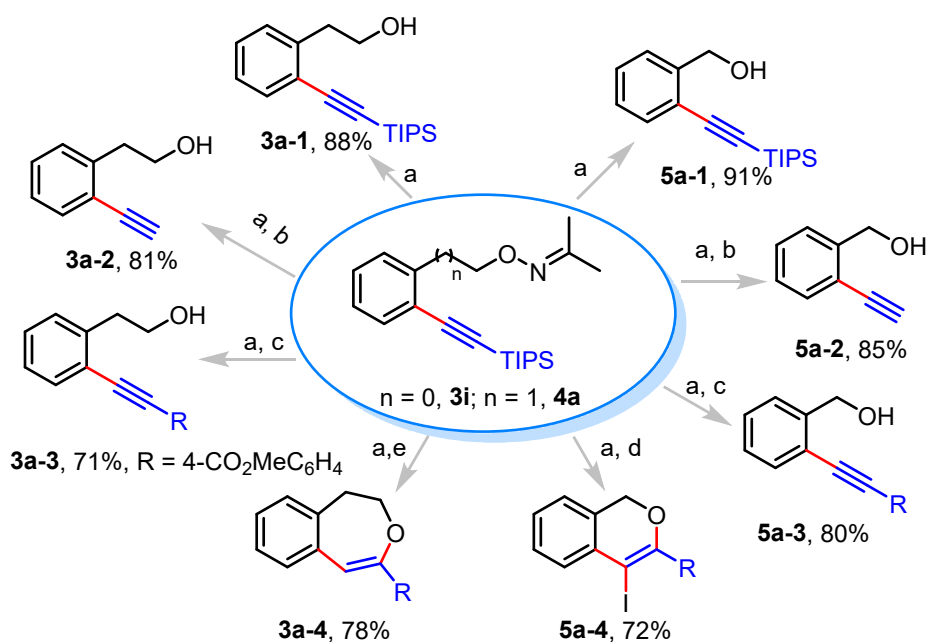

Conditions: a) Zn, HOAc/THF/H<sub>2</sub>O = 3:1:1, RT; b) TBAF (2.0 equiv.), THF, RT; c) 4-CO<sub>2</sub>MeC<sub>6</sub>H<sub>4</sub>I (1.0 equiv.), TBAF (2.0 equiv.), Pd(PPh<sub>3</sub>)<sub>2</sub>Cl<sub>2</sub> (10 mol%), Et<sub>3</sub>N/THF, 50 °C; d) I<sub>2</sub>, CH<sub>3</sub>CN; e) Pd(CH<sub>3</sub>CN)<sub>2</sub>Cl<sub>2</sub> (10 mol%), THF, RT.

Figure SI-5. Synthetic transformations.



## D. Mechanistic studies

According to the literature and experimental observations, it was proposed that ligand exchange of Pd(II) catalyst to the alcohol substrates initiated this transformation (**Figure SI-6**). Notably, with the assistance of MPAA, deprotonation took place with lower activation barrier, delivering to the corresponding 6, 7 or 8-membered palladacycle intermediate **B**. Further oxidation of the palladacycle intermediate with bromoalkyne **2** might proceed to give Pd<sup>IV</sup> species **C**, which underwent subsequent reductive elimination to afford the desired alkynes. Alternatively, alkyne migratory insertion into the palladacycle **B** led to the palladacycle species **C'**, which followed by *trans*  $\beta$  elimination to release the desired alkyne products.

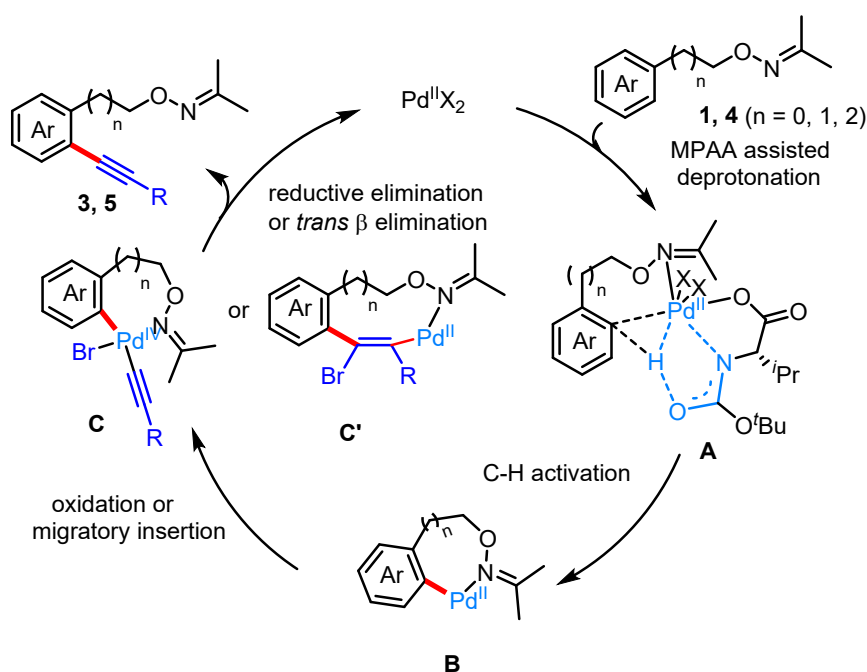

**Figure SI-6.** Proposed mechanism for remote C-H alkylation under Pd(II)/MPAA catalysis.

For secondary and tertiary Csp<sup>3</sup>-H alkylation (**Figure SI-7**) enabled by amide attached oximes under Pd(II) catalysis, a bidentate [5. 5] palladacycle intermediates **9-A**, was the key intermediate, to achieve simultaneous site-selectivity and efficiency of this transformation. Subsequent haloalkyne migratory insertion or further oxidation, affording to seven-membered palladacycle or Pd(IV) intermediate **9B** or **9B'**. Finally, *trans* β-elimination or reductive elimination afforded to the alkyne products **10**. Notably, sequential secondary Csp<sup>3</sup>-H alkylation followed tertiary Csp<sup>3</sup>-H alkylation, might proceed to afford iterative Csp<sup>3</sup>-H activation product **10b**. We speculated that the secondary Csp<sup>3</sup>-H alkylation product might enhance the acidity of the β Csp<sup>3</sup>-H to alcohols, and thus, accelerating the further tertiary Csp<sup>3</sup>-H alkylation.

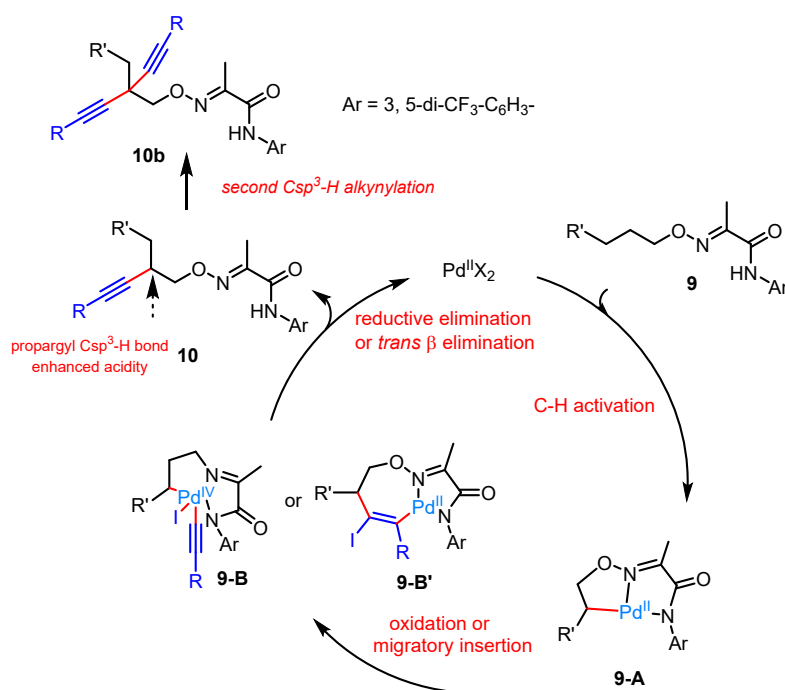

**Figure SI-7.** Proposed mechanism for secondary and tertiary Csp<sup>3</sup>-H alkylation enabled by amide attached oximes.

## E. Analytical data for the alkyne products:

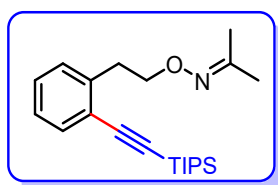

**Propan-2-one *O*-(2-((triisopropylsilyl)ethynyl)phenethyl) oxime (3a)**,  $^1\text{H NMR}$  (400 MHz,  $\text{CDCl}_3$ )  $\delta$  7.47 (d,  $J = 7.6$  Hz, 1H), 7.24-7.22 (m, 2H), 7.17-7.13 (m, 1H), 4.27 (t,  $J = 6.8$  Hz, 2H), 3.17 (t,  $J = 6.8$  Hz, 2H), 1.87 (s, 3H), 1.81 (s, 3H), 1.14 (s, 21H).  $^{13}\text{C NMR}$  (100 MHz,  $\text{CDCl}_3$ )  $\delta$  154.8, 141.3, 132.9, 129.8, 128.4, 126.2, 123.5, 105.5, 94.5, 72.8, 34.9, 22.0, 18.8, 15.7, 11.5. HRMS (ESI-TOF)  $m/z$ :  $[\text{M} + \text{H}]^+$  Calcd for  $\text{C}_{22}\text{H}_{36}\text{NOSi}$ : 358.2561, found: 358.2566.

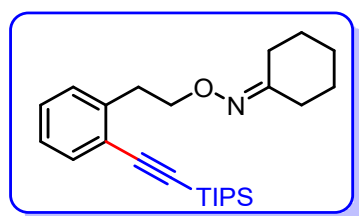

**Cyclohexanone *O*-(2-((triisopropylsilyl)ethynyl)phenethyl) oxime (3b)**,  $^1\text{H NMR}$  (400 MHz,  $\text{CDCl}_3$ )  $\delta$  7.47 (d,  $J = 7.6$  Hz, 1H), 7.23-7.22 (m, 2H), 7.17-7.14 (m, 1H), 4.26 (t,  $J = 6.8$  Hz, 2H), 3.17 (t,  $J = 6.8$  Hz, 2H), 2.43-2.40 (m, 2H), 2.23-2.18 (m, 2H), 1.67 (s, 2H), 1.59-1.57 (m, 4H), 1.14 (s, 21H).  $^{13}\text{C NMR}$  (100 MHz,  $\text{CDCl}_3$ )  $\delta$  160.3, 141.4, 132.9, 129.8, 128.3, 126.1, 123.5, 105.5, 94.5, 72.7, 34.8, 32.3, 27.2, 25.9, 18.8, 11.5. HRMS (ESI-TOF)  $m/z$ :  $[\text{M} + \text{H}]^+$  Calcd for  $\text{C}_{25}\text{H}_{40}\text{NOSi}$ : 398.2874, found: 398.28746.

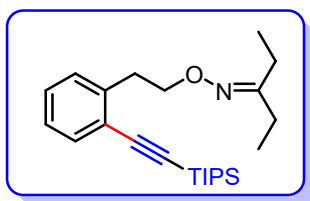

**Pentan-3-one *O*-(2-((triisopropylsilyl)ethynyl)phenethyl) oxime (3c)**,  $^1\text{H NMR}$  (400 MHz,  $\text{CDCl}_3$ )  $\delta$  7.47 (d,  $J = 7.6$  Hz, 1H), 7.23-7.22 (m, 2H), 7.18-7.13 (m, 1H), 4.27 (t,  $J = 7.2$  Hz, 2H), 4.22 (t,  $J = 6.8$  Hz, 2H), 3.17 (t,  $J = 6.8$  Hz, 2H), 2.96 (t,  $J = 7.2$  Hz, 2H), 2.29-2.25 (m, 3H), 2.19 (q,  $J = 4$  Hz, 3H), 1.13 (s, 21H).  $^{13}\text{C NMR}$  (100 MHz,  $\text{CDCl}_3$ )  $\delta$  163.4, 141.4, 132.9, 129.8, 128.3, 126.1, 123.4, 105.5, 94.5, 72.7, 34.8, 27.2, 21.4, 18.8, 11.5. HRMS (ESI-TOF)  $m/z$ :  $[\text{M} + \text{H}]^+$  Calcd for  $\text{C}_{24}\text{H}_{40}\text{NOSi}$ : 386.2874, found: 386.2871.

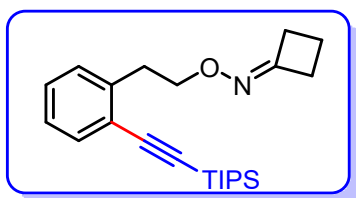

**Cyclobutanone *O*-(2-((triisopropylsilyl)ethynyl)phenethyl) oxime (3d)**,  $^1\text{H NMR}$  (400 MHz,  $\text{CDCl}_3$ )  $\delta$  7.47 (d,  $J = 7.6$  Hz, 1H), 7.24-7.22 (m, 2H), 7.18-7.13 (m, 1H), 4.25 (t,  $J = 7.2$  Hz, 2H), 3.17 (t,  $J = 7.2$  Hz, 2H), 2.93-2.84 (m, 4H), 1.99 (t,  $J = 4$  Hz, 2H), 1.13 (s, 21H).  $^{13}\text{C NMR}$  (100 MHz,  $\text{CDCl}_3$ )  $\delta$  158.7, 141.1, 132.9, 128.4, 128.4, 126.2, 123.5, 105.4, 94.6, 73.1, 34.9, 31.8, 18.8, 14.7, 11.5. HRMS (ESI-TOF)  $m/z$ :  $[\text{M} + \text{H}]^+$  Calcd for  $\text{C}_{23}\text{H}_{36}\text{NOSi}$ : 370.2561, found: 370.2563.

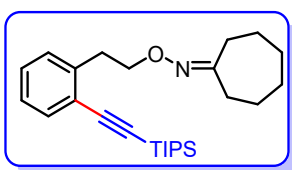

**Cycloheptanone *O*-(2-((triisopropylsilyl)ethynyl)phenethyl) oxime (3e)**,  $^1\text{H NMR}$  (400 MHz,  $\text{CDCl}_3$ )  $\delta$  7.47 (d,  $J = 7.6$  Hz, 1H), 7.23-7.22 (m, 2H), 7.17-7.13 (m, 1H), 4.28 (t,  $J = 6.8$  Hz, 3H), 3.18 (t,  $J = 6.8$  Hz, 3H), 2.48-2.45 (m, 2H), 2.38-2.35 (m, 2H), 1.64-1.54 (m, 8H), 1.14 (s, 21H).  $^{13}\text{C NMR}$  (100 MHz,  $\text{CDCl}_3$ )  $\delta$  153.7, 141.4, 132.9, 128.3, 126.1, 123.5, 110.3, 105.5, 91.3, 72.8, 33.8, 30.6, 29.3, 28.0, 24.8, 18.8, 11.5. HRMS (ESI-TOF)  $m/z$ :  $[\text{M} + \text{H}]^+$  Calcd for  $\text{C}_{26}\text{H}_{42}\text{NOSi}$ : 412.3030, found: 412.3035.

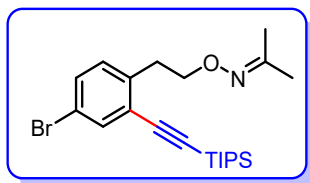

**Propan-2-one *O*-(4-bromo-2-((triisopropylsilyl)ethynyl)phenethyl) oxime (3f), <sup>1</sup>H NMR (400 MHz, CDCl<sub>3</sub>) δ 7.59 (d, *J* = 2 Hz, 1H), 7.34 (dd, *J* = 2.4 Hz, *J* = 8.4 Hz, 1H), 7.08 (d, *J* = 8 Hz, 1H), 4.23 (t, *J* = 6.8 Hz, 2H), 3.11 (t, *J* = 6.8 Hz, 2H), 1.87 (s, 3H), 1.80 (s, 3H), 1.13 (s, 21H). <sup>13</sup>C NMR (100 MHz, CDCl<sub>3</sub>) δ 155.0, 140.4, 135.2, 131.4, 131.3, 125.4, 119.5, 103.9, 96.3, 72.4, 34.3, 22.0, 18.8, 15.7, 11.4. HRMS (ESI-TOF) *m/z*: [M + H]<sup>+</sup> Calcd for C<sub>22</sub>H<sub>35</sub>BrNOSi: 436.1666, found: 436.1660.**

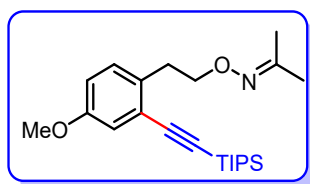

**Propan-2-one *O*-(4-methoxy-2-((triisopropylsilyl)ethynyl)phenethyl) oxime (3g), <sup>1</sup>H NMR (400 MHz, CDCl<sub>3</sub>) δ 7.12 (d, *J* = 8.4 Hz, 1H), 6.98 (d, *J* = 2.8 Hz, 1H), 6.80 (dd, *J* = 2.8 Hz, *J* = 8.4 Hz, 1H), 4.22 (t, *J* = 7.2 Hz, 2H), 3.80 (s, 3H), 3.10 (t, *J* = 6.8 Hz, 2H), 1.87 (s, 3H), 1.81 (s, 3H), 1.13 (s, 21H). <sup>13</sup>C NMR (100 MHz, CDCl<sub>3</sub>) δ 157.7, 154.7, 133.7, 130.8, 130.1, 124.2, 117.2, 115.1, 105.4, 94.3, 73.1, 55.5, 34.0, 22.0, 18.8, 15.7, 11.5. HRMS (ESI-TOF) *m/z*: [M + H]<sup>+</sup> Calcd for C<sub>23</sub>H<sub>38</sub>NO<sub>2</sub>Si: 388.2666, found: 388.2662.**

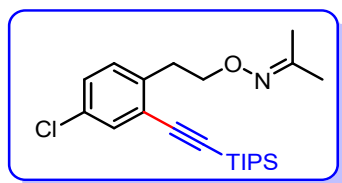

**Propan-2-one *O*-(4-chloro-2-((triisopropylsilyl)ethynyl)phenethyl) oxime (3h), <sup>1</sup>H NMR (400 MHz, CDCl<sub>3</sub>) δ 7.44 (d, *J* = 2.0 Hz, 1H), 7.19 (dd, *J* = 2.0 Hz, *J* = 8.4 Hz, 1H), 7.15 (s, 1H), 4.23 (t, *J* = 6.8 Hz, 2H), 3.13 (t, *J* = 6.6 Hz, 2H), 1.87 (s, 3H), 1.80 (s, 3H), 1.13 (s, 21H). <sup>13</sup>C NMR (100 MHz, CDCl<sub>3</sub>) δ 155.0, 139.9, 132.4, 131.7, 131.0, 128.5, 125.0, 104.0, 96.2, 72.5, 34.3, 29.8, 22.0, 18.8, 15.8, 11.4. HRMS (ESI-TOF) *m/z*: [M + H]<sup>+</sup> Calcd for C<sub>22</sub>H<sub>35</sub>ClNOSi: 392.2171, found: 392.2175.**

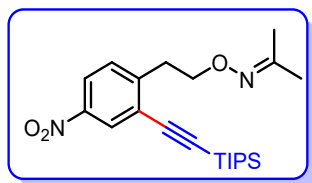

**Propan-2-one *O*-(4-nitro-2-((triisopropylsilyl)ethynyl)phenethyl) oxime (3i), <sup>1</sup>H NMR (400 MHz, CDCl<sub>3</sub>) δ** 8.29 (d, *J* = 2.4 Hz, 1H), 8.06 (dd, *J* = 2.4 Hz, *J* = 8.4 Hz, 1H), 7.38 (d, *J* = 3.6 Hz, 1H), 4.29 (t, *J* = 6.8 Hz, 2H), 3.26 (t, *J* = 6.4 Hz, 2H), 1.87 (s, 3H), 1.79 (s, 3H), 1.14 (d, *J* = 3.8 Hz, 21H). <sup>13</sup>C NMR (100 MHz, CDCl<sub>3</sub>) δ 155.3, 149.0, 146.4, 130.7, 127.6, 124.9, 122.9, 102.9, 98.2, 71.9, 58.6, 34.9, 22.0, 18.8, 15.8, 11.4. HRMS (ESI-TOF) *m/z*: [M + H]<sup>+</sup> Calcd for C<sub>22</sub>H<sub>35</sub>N<sub>2</sub>O<sub>3</sub>Si: 403.2411, found: 403.2414.

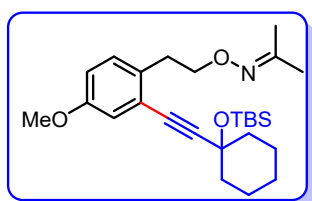

**Propan-2-one *O*-(2-((1-((tert-butyldimethylsilyl)oxy)cyclohexyl)ethynyl)-4-methoxyphenethyl) oxime (3j), <sup>1</sup>H NMR (400 MHz, CDCl<sub>3</sub>) δ** 7.13 (d, *J* = 8.4 Hz, 1H), 6.94 (d, *J* = 2.4 Hz, 1H), 6.80 (dd, *J* = 2.8 Hz, *J* = 8.4 Hz, 1H), 4.20 (t, *J* = 6.8 Hz, 2H), 3.80 (s, 3H), 3.07 (t, *J* = 7.2 Hz, 2H), 1.87 (s, 3H), 1.82 (s, 3H), 0.90 (s, 9H), 0.21 (s, 3H), 0.07 (s, 3H). <sup>13</sup>C NMR (100 MHz, CDCl<sub>3</sub>) δ 157.8, 154.7, 133.1, 130.8, 129.8, 124.0, 116.9, 114.5, 113.9, 97.6, 83.3, 73.2, 55.4, 41.4, 33.9, 29.8, 25.5, 23.1, 22.0, 18.3, 15.7, 1.17, -2.6. HRMS (ESI-TOF) *m/z*: [M + H]<sup>+</sup> Calcd for C<sub>26</sub>H<sub>42</sub>NO<sub>3</sub>Si: 444.2928, found: 444.2925.

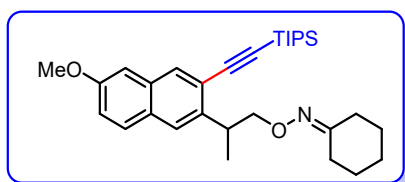

**Cyclohexanone *O*-(2-(6-methoxy-3-((triisopropylsilyl)ethynyl)naphthalen-2-yl)propyl) oxime (3k), <sup>1</sup>H NMR (400 MHz, CDCl<sub>3</sub>) δ** 7.92 (s, 1H), 7.64 (d, *J* = 9.2 Hz, 1H), 7.58 (s, 1H), 7.11 (dd, *J* = 2.4 Hz, *J* = 8.8 Hz, 1H), 7.05 (d, *J* = 2.4 Hz, 1H), 4.40-4.36 (m, 1H), 4.19-4.15 (m, 1H), 3.90 (s, 3H), 3.86-3.81 (m, 1H), 2.39 (t, *J* = 6.4 Hz, 2H), 2.16 (t, *J* = 6.0 Hz, 2H), 1.65-1.60 (m, 2H), 1.56-1.51 (m, 4H), 1.39 (d, *J* = 6.8 Hz,

3H), 1.17 (s, 21H).  $^{13}\text{C}$  NMR (100 MHz,  $\text{CDCl}_3$ )  $\delta$  160.2, 157.7, 140.5, 132.7, 132.0, 131.2, 129.2, 128.9, 124.8, 122.3, 119.6, 106.0, 105.1, 94.7, 77.6, 55.4, 36.9, 32.3, 27.2, 26.0, 25.9, 18.9, 11.6. HRMS (ESI-TOF)  $m/z$ :  $[\text{M} + \text{H}]^+$  Calcd for  $\text{C}_{31}\text{H}_{46}\text{NO}_2\text{Si}$ : 492.3292, found: 492.3295.

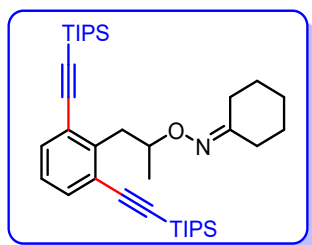

**Cyclohexanone *O*-(1-(2,6-bis((triisopropylsilyl)ethynyl)phenyl)propan-2-yl) oxime (3m)**,  $^1\text{H}$  NMR (400 MHz,  $\text{CDCl}_3$ )  $\delta$  7.40 (d,  $J = 8.0$  Hz, 2H), 7.07 (t,  $J = 7.6$  Hz, 1H), 4.69-4.61 (m, 1H), 3.47-3.42 (m, 1H), 3.27-3.22 (m, 1H), 2.50-2.34 (m, 2H), 2.09-2.04 (m, 4H), 1.93-1.91 (m, 2H), 1.75-1.73 (m, 2H), 1.13 (s, 42H), 1.08-1.05 (m, 3H).  $^{13}\text{C}$  NMR (100 MHz,  $\text{CDCl}_3$ )  $\delta$  158.7, 143.9, 133.0, 125.7, 124.5, 105.8, 94.5, 77.8, 55.9, 39.7, 35.1, 32.2, 27.2, 18.9, 11.5. HRMS (ESI-TOF)  $m/z$ :  $[\text{M} + \text{H}]^+$  Calcd for  $\text{C}_{37}\text{H}_{62}\text{NOSi}_2$ : 592.4364, found: 592.4361.

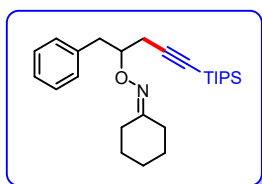

**Cyclohexanone *O*-(1-phenyl-5-(triisopropylsilyl)pent-4-yn-2-yl) oxime (3m')**,  $^1\text{H}$  NMR (400 MHz,  $\text{CDCl}_3$ ):  $\delta$  7.27-7.26 (m, 4H), 7.23-7.18 (m, 1H), 4.37-4.31 (m, 1H), 3.11 (dd,  $J = 5.6$  Hz, 8.8 Hz, 1H), 3.02 (dd,  $J = 6.8$  Hz, 14.0 Hz, 1H), 2.58-2.49 (m, 2H), 2.47-2.43 (m, 2H), 2.19-2.16 (m, 2H), 1.65-1.56 (m, 6H), 1.25 (s, 2H), 1.10-1.09 (m, 19H).  $^{13}\text{C}$  NMR (100 MHz,  $\text{CDCl}_3$ ):  $\delta$  160.6, 138.4, 129.7, 128.1, 126.1, 105.3, 82.5, 80.8, 38.4, 32.2, 29.7, 27.1, 25.8, 24.2, 18.7, 18.6, 18.5, 18.4, 17.7, 12.3, 11.4, 11.2. HRMS (ESI-TOF)  $m/z$ :  $[\text{M} + \text{H}]^+$  Calcd for  $\text{C}_{26}\text{H}_{41}\text{NOSi}$ : 411.2957; Found: 411.2961.

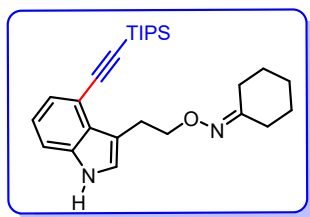

**Cyclohexanone *O*-(2-(4-((triisopropylsilyl)ethynyl)-1*H*-indol-3-yl)ethyl) oxime (31)**,  $^1\text{H NMR}$  (400 MHz,  $\text{CDCl}_3$ )  $\delta$  8.08 (s, 1H), 7.51 (d,  $J = 8.0$  Hz, 2H), 7.17-7.16 (m, 1H), 7.13-7.09 (m, H), 7.01-6.98 (m, 1H), 4.20 (t,  $J = 6.8$  Hz, 2H), 3.13 (t,  $J = 6.8$  Hz, 2H), 2.34-2.31 (m, 2H), 2.12 (t,  $J = 6.0$  Hz, 2H), 1.58-1.57 (m, 2H), 1.48-1.47 (m, 4H), 1.07 (s, 21H).  $^{13}\text{C NMR}$  (100 MHz,  $\text{CDCl}_3$ )  $\delta$  160.2, 135.7, 127.7, 123.6, 120.4, 119.9, 119.8, 117.5, 110.8, 98.2, 97.7, 73.0, 32.3, 27.1, 26.0, 18.8, 17.8, 11.4. HRMS (ESI-TOF)  $m/z$ :  $[\text{M} + \text{H}]^+$  Calcd for  $\text{C}_{27}\text{H}_{41}\text{N}_2\text{OSi}$ : 437.2983, found: 437.2989.

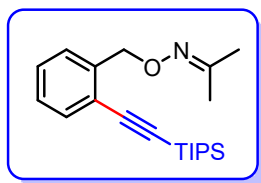

**Propan-2-one *O*-(2-((triisopropylsilyl)ethynyl)benzyl) oxime (5a)**,  $^1\text{H NMR}$  (400 MHz,  $\text{CDCl}_3$ )  $\delta$  7.47 (d,  $J = 7.6$  Hz, 1H), 7.23-7.22 (m, 2H), 7.17-7.14 (m, 1H), 4.29-4.25 (m, 2H), 1.88 (d,  $J = 2.0$  Hz, 3H), 1.81 (d,  $J = 2$  Hz, 3H), 1.13 (s, 21H).  $^{13}\text{C NMR}$  (100 MHz,  $\text{CDCl}_3$ )  $\delta$  160.9, 140.8, 132.8, 128.4, 127.6, 127.1, 122.2, 104.5, 95.6, 73.5, 32.3, 27.2, 18.9, 11.5. HRMS (ESI-TOF)  $m/z$ :  $[\text{M} + \text{H}]^+$  Calcd for  $\text{C}_{21}\text{H}_{34}\text{NOSi}$ : 344.2404, found: 344.2401.

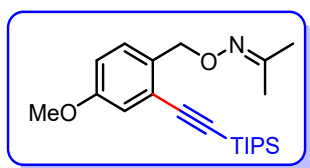

**Propan-2-one *O*-(4-methoxy-2-((triisopropylsilyl)ethynyl)benzyl) oxime (5b)**,  $^1\text{H NMR}$  (400 MHz,  $\text{CDCl}_3$ )  $\delta$  7.30 (d,  $J = 8.8$  Hz, 1H), 7.00 (d,  $J = 2.8$  Hz, 1H), 6.86 (dd,  $J = 2.8$  Hz,  $J = 8.8$  Hz, 1H), 5.18 (s, 2H), 3.80 (s, 3H), 1.87 (d,  $J = 2.8$  Hz, 6H), 1.13 (s, 21H).  $^{13}\text{C NMR}$  (100 MHz,  $\text{CDCl}_3$ )  $\delta$  158.8, 155.0, 132.8, 130.0, 123.9, 114.9, 104.6, 95.1, 73.4, 55.5, 22.0, 18.8, 15.9, 11.5. HRMS (ESI-TOF)  $m/z$ :  $[\text{M} + \text{H}]^+$  Calcd for  $\text{C}_{22}\text{H}_{36}\text{NO}_2\text{Si}$ : 374.2510, found: 374.2513.



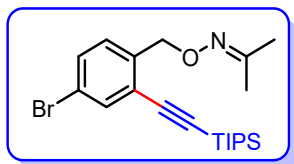

**Propan-2-one *O*-(4-bromo-2-((triisopropylsilyl)ethynyl)benzyl) oxime (5c),**  $^1\text{H NMR}$  (400 MHz,  $\text{CDCl}_3$ )  $\delta$  7.63 (s, 1H), 7.46 (d,  $J = 8.4$  Hz, 1H), 7.29 (d,  $J = 4.8$  Hz, 1H), 5.22 (s, 2H), 1.93 (s, 3H), 1.90 (s, 3H), 1.16 (s, 21H).  $^{13}\text{C NMR}$  (100 MHz,  $\text{CDCl}_3$ )  $\delta$  155.7, 139.8, 135.2, 131.5, 129.3, 124.2, 120.7, 102.9, 97.4, 73.0, 22.0, 18.8, 15.9, 11.4. HRMS (ESI-TOF)  $m/z$ :  $[\text{M} + \text{H}]^+$  Calcd for  $\text{C}_{21}\text{H}_{33}\text{BrNOSi}$ : 422.1509, found: 422.1507.

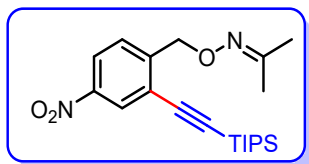

**Propan-2-one *O*-(4-nitro-2-((triisopropylsilyl)ethynyl)benzyl) oxime (5d),**  $^1\text{H NMR}$  (400 MHz,  $\text{CDCl}_3$ )  $\delta$  8.28 (d,  $J = 1.6$  Hz, 1H), 8.13 (dd,  $J = 2.0$  Hz,  $J = 8.4$  Hz, 1H), 7.53 (d,  $J = 8.8$  Hz, 1H), 5.13 (s, 2H), 1.96 (s, 3H), 1.89 (s, 3H), 1.15 (s, 21H).  $^{13}\text{C NMR}$  (100 MHz,  $\text{CDCl}_3$ )  $\delta$  156.4, 148.4, 146.9, 127.8, 127.4, 123.1, 123.0, 101.7, 99.6, 72.8, 22.0, 18.8, 16.0, 11.3. HRMS (ESI-TOF)  $m/z$ :  $[\text{M} + \text{H}]^+$  Calcd for  $\text{C}_{21}\text{H}_{33}\text{N}_2\text{O}_3\text{Si}$ : 389.2255, found: 389.2258.

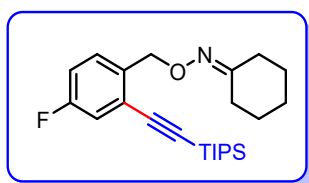

**Cyclohexanone *O*-(4-fluoro-2-((triisopropylsilyl)ethynyl)benzyl) oxime (5e),**  $^1\text{H NMR}$  (400 MHz,  $\text{CDCl}_3$ )  $\delta$  7.33 (dd,  $J = 6.0$  Hz,  $J = 8.4$  Hz, 1H), 7.16 (dd,  $J = 2.4$  Hz,  $J = 9.2$  Hz, 1H), 7.02-6.97 (m, 1H), 5.20 (s, 1H), 2.51 (t,  $J = 5.6$  Hz, 2H), 2.20 (t,  $J = 6.0$  Hz, 2H), 1.67-1.63 (m, 2H), 1.60 (brs, 4H), 1.13 (s, 21H).  $^{13}\text{C NMR}$  (100 MHz,  $\text{CDCl}_3$ )  $\delta$  161.6 (d,  $J = 250.0$  Hz), 161.1, 136.7 (d,  $J = 3.0$  Hz), 129.7 (d,  $J = 8.0$  Hz), 124.0, 119.2 (d,  $J = 23.0$  Hz), 115.6 (d,  $J = 21.0$  Hz), 103.3, 96.8, 72.9, 32.3, 27.2, 25.6, 18.8, 11.4.  $^{19}\text{F NMR}$  (300 MHz,  $\text{CDCl}_3$ )  $\delta$  -115.7. HRMS (ESI-TOF)  $m/z$ :  $[\text{M} + \text{H}]^+$  Calcd for  $\text{C}_{24}\text{H}_{37}\text{FNOSi}$ : 402.2623, found: 402.2627.

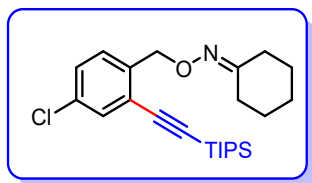

**Cyclohexanone *O*-(4-chloro-2-((triisopropylsilyl)ethynyl)benzyl) oxime (5f), <sup>1</sup>H NMR (400 MHz, CDCl<sub>3</sub>) δ 7.44 (d, *J* = 2.4 Hz, 1H), 7.31 (d, *J* = 8.4 Hz, 1H), 7.27 (d, *J* = 2.0 Hz, 1H), 5.20 (s, 2H), 2.53-2.50 (m, 2H), 2.21-2.18 (m, 2H), 1.69-1.65 (m, 2H), 1.61-1.60 (m, 4H), 1.13 (s, 21H). <sup>13</sup>C NMR (100 MHz, CDCl<sub>3</sub>) δ 161.2, 139.4, 132.8, 132.3, 129.0, 128.6, 123.8, 103.0, 97.3, 72.8, 32.3, 27.2, 25.9, 18.8, 11.4. HRMS (ESI-TOF) *m/z*: [M + H]<sup>+</sup> Calcd for C<sub>24</sub>H<sub>37</sub>ClNOSi: 418.2327, found: 418.2322.**

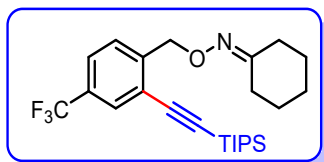

**Cyclohexanone *O*-(4-(trifluoromethyl)-2-((triisopropylsilyl)ethynyl)benzyl) oxime (5g), <sup>1</sup>H NMR (400 MHz, CDCl<sub>3</sub>) δ 7.69 (s, 1H), 7.54 (d, *J* = 8.0 Hz, 1H), 7.48 (d, *J* = 8.4 Hz, 1H), 5.28 (s, 2H), 2.54 (t, *J* = 5.6 Hz, 2H), 2.20 (t, *J* = 5.6 Hz, 2H), 1.67-1.65 (m, 2H), 1.59 (s, 4H), 1.14 (s, 21H). <sup>13</sup>C NMR (100 MHz, CDCl<sub>3</sub>) δ 161.5, 145.0, 130.2 (q, *J* = 32.0 Hz), 129.7, 129.4 (q, *J* = 3.0 Hz), 127.6, 124.9 (q, *J* = 4.0 Hz), 124.1 (q, *J* = 270.0 Hz), 122.5, 102.8, 98.0, 72.9, 32.3, 27.2, 25.9, 18.8, 11.4. <sup>19</sup>F NMR (300 MHz, CDCl<sub>3</sub>) δ -62.7 (3F). HRMS (ESI-TOF) *m/z*: [M + H]<sup>+</sup> Calcd for C<sub>25</sub>H<sub>37</sub>F<sub>3</sub>NOSi: 452.2591, found: 452.2595.**

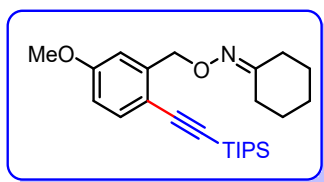

**Cyclohexanone *O*-(5-methoxy-2-((triisopropylsilyl)ethynyl)benzyl) oxime (5h), <sup>1</sup>H NMR (400 MHz, CDCl<sub>3</sub>) δ 7.40 (d, *J* = 8.8 Hz, 1H), 6.93 (d, *J* = 2.0 Hz, 1H), 6.74 (dd, *J* = 2.4 Hz, *J* = 8.8 Hz, 1H), 5.24 (s, 1H), 3.81 (d, *J* = 0.8 Hz, 1H), 2.55 (t, *J* = 6.0 Hz, 2H), 2.23-2.20 (m, 2H), 1.70-1.65 (m, 2H), 1.61-1.59 (m, 4H), 1.12 (s, 21H). <sup>13</sup>C NMR (100 MHz, CDCl<sub>3</sub>) δ 161.1, 159.8, 142.8, 134.2, 124.5, 114.2, 113.1, 112.7, 104.5, 93.7, 73.4, 55.4, 32.3, 27.2, 25.7, 18.9, 11.5. HRMS (ESI-TOF) *m/z*: [M + H]<sup>+</sup> Calcd**

for C<sub>25</sub>H<sub>40</sub>NO<sub>2</sub>Si: 414.2823, found: 414.2819.

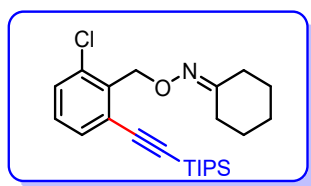

**Cyclohexanone *O*-(2-chloro-6-((triisopropylsilyl)ethynyl)benzyl) oxime (5i)**, <sup>1</sup>H NMR (400 MHz, CDCl<sub>3</sub>) δ 7.34 (d, *J* = 7.6 Hz, 1H), 7.27 (d, *J* = 8 Hz, 1H), 7.13-7.09 (m, 1H), 5.28 (s, 1H), 2.35-2.33 (m, 2H), 2.12 (t, *J* = 6.4 Hz, 2H), 1.57 (d, *J* = 6.0 Hz, 2H), 1.47 (d, *J* = 2.8 Hz, 4H), 1.06 (s, 21H). <sup>13</sup>C NMR (100 MHz, CDCl<sub>3</sub>) δ 161.1, 136.2, 136.4, 131.6, 129.9, 129.1, 127.1, 104.3, 95.9, 70.9, 32.3, 27.1, 26.0, 18.8, 11.5. HRMS (ESI-TOF) *m/z*: [M + H]<sup>+</sup> Calcd for C<sub>24</sub>H<sub>37</sub>ClNOSi: 418.2327, found: 418.2322.

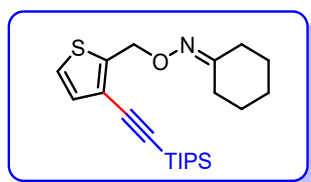

**Cyclohexanone *O*-((3-((triisopropylsilyl)ethynyl)thiophen-2-yl)methyl) oxime (5j)**, <sup>1</sup>H NMR (400 MHz, CDCl<sub>3</sub>) δ 7.08 (d, *J* = 3.6 Hz, 1H), 6.85 (d, *J* = 3.6 Hz, 1H), 5.11 (s, 2H), 2.46-2.44 (m, 2H), 2.21 (t, *J* = 6 Hz, 2H), 1.67 (brs, 2H), 1.57 (brs, 4H), 1.11 (s, 21H). <sup>13</sup>C NMR (100 MHz, CDCl<sub>3</sub>) δ 161.7, 142.9, 132.2, 126.0, 124.1, 99.8, 95.5, 69.8, 32.3, 27.1, 25.9, 18.8, 11.4. HRMS (ESI-TOF) *m/z*: [M + H]<sup>+</sup> Calcd for C<sub>22</sub>H<sub>36</sub>NOSSi: 390.2281, found: 390.2283.

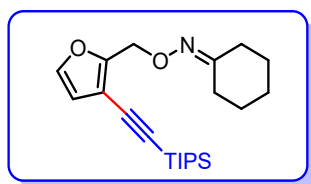

**Cyclohexanone *O*-((3-((triisopropylsilyl)ethynyl)furan-2-yl)methyl) oxime (5k)**, <sup>1</sup>H NMR (400 MHz, CDCl<sub>3</sub>) δ 6.55 (d, *J* = 3.2 Hz, 1H), 6.31 (d, *J* = 3.2 Hz, 1H), 4.93 (s, 2H), 2.46-2.44 (m, 2H), 2.21-2.17 (s, 2H), 1.67-1.66 (m, 2H), 1.58-1.57 (m, 4H), 1.12 (s, 21H). <sup>13</sup>C NMR (100 MHz, CDCl<sub>3</sub>) δ 161.6, 152.9, 142.8, 137.3, 116.7, 110.4, 96.7, 67.2, 32.3, 27.1, 25.9, 18.7, 11.4. HRMS (ESI-TOF) *m/z*: [M + H]<sup>+</sup> Calcd for C<sub>22</sub>H<sub>36</sub>NO<sub>2</sub>Si: 374.2510, found: 374.2516.

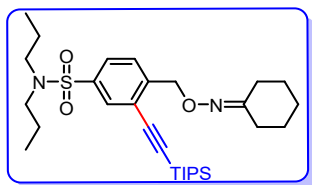

**4-(((Cyclohexylideneamino)oxy)methyl)-N,N-dipropyl-3-((triisopropylsilyl)ethynyl)benzenesulfonamide (5l)**,  $^1\text{H NMR}$  (400 MHz,  $\text{CDCl}_3$ )  $\delta$  7.86 (d,  $J = 1.60$  Hz, 1H), 7.70 (dd,  $J = 2.0$  Hz,  $J = 8.4$  Hz, 1H), 7.48 (d,  $J = 8.4$  Hz, 1H), 5.28 (s, 2H), 3.07 (t,  $J = 7.6$  Hz, 4H), 2.55 (t,  $J = 6.0$  Hz, 2H), 2.20 (t,  $J = 6.0$  Hz, 2H), 1.68-1.61 (m, 6H), 1.57-1.54 (m, 4H), 1.14 (s, 21H), 0.88 (t,  $J = 3.2$  Hz, 6H).  $^{13}\text{C NMR}$  (100 MHz,  $\text{CDCl}_3$ )  $\delta$  161.7, 145.7, 138.9, 131.0, 127.5, 126.6, 122.6, 102.5, 98.6, 72.8, 50.2, 32.2, 25.9, 25.7, 18.8, 11.4, 11.3. HRMS (ESI-TOF)  $m/z$ :  $[\text{M} + \text{H}]^+$  Calcd for  $\text{C}_{30}\text{H}_{51}\text{N}_2\text{O}_3\text{Si}$ : 547.3384, found: 547.3387.

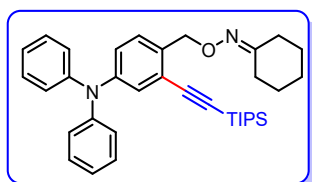

**Cyclohexanone *O*-(4-(diphenylamino)-2-((triisopropylsilyl)ethynyl)benzyl) oxime (5m)**,  $^1\text{H NMR}$  (400 MHz,  $\text{CDCl}_3$ )  $\delta$  7.27-7.26 (m, 2H), 7.25-7.24 (m, 2H), 7.23-7.21 (m, 2H), 7.08-7.06 (m, 4H), 7.03-6.99 (m, 3H), 5.22 (s, 2H), 2.52 (t,  $J = 6.0$  Hz, 2H), 2.22 (t,  $J = 6.8$  Hz, 2H), 1.66-1.64 (m, 2H), 1.60-1.58 (m, 4H), 1.10 (s, 21H).  $^{13}\text{C NMR}$  (100 MHz,  $\text{CDCl}_3$ )  $\delta$  161.2, 147.7, 147.0, 135.0, 129.4, 129.3, 127.8, 124.7, 124.3, 123.4, 123.0, 104.2, 95.7, 73.4, 32.3, 27.2, 25.7, 18.8, 11.4. HRMS (ESI-TOF)  $m/z$ :  $[\text{M} + \text{H}]^+$  Calcd for  $\text{C}_{36}\text{H}_{47}\text{N}_2\text{OSi}$ : 551.3452, found: 551.3457.

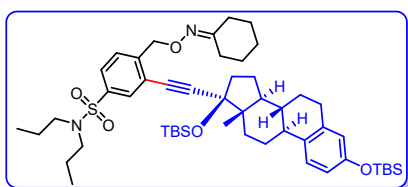

**3-(((8*R*,9*S*,13*S*,14*S*,17*S*)-3,17-bis((tert-butyl dimethylsilyl)oxy)-13-methyl-7,8,9,11,12,13,14,15,16,17-decahydro-6*H*-cyclopenta[*a*]phenanthren-17-yl)ethynyl)-4-(((cyclohexylideneamino)oxy)methyl)-N,N-dipropylbenzenesulfonamide (5n)**,  $^1\text{H NMR}$  (400 MHz,  $\text{CDCl}_3$ )  $\delta$  7.82 (d,  $J = 1.6$  Hz, 1H), 7.71 (dd,  $J = 1.6$  Hz,  $J = 8.0$  Hz, 1H), 7.13 (d,  $J = 8.4$  Hz, 1H), 6.61 (dd,  $J = 2.4$  Hz,  $J = 8.4$  Hz, 1H), 6.55 (s, 1H), 5.25

(s, 2H), 3.07 (t,  $J = 7.6$  Hz, 4H), 2.83-2.79 (m, 2H), 2.52 (t,  $J = 2.8$  Hz, 2H), 2.38-2.33 (m, 2H), 2.14 (t,  $J = 6.0$  Hz, 2H), 2.08-2.04 (m, 1H), 1.93-1.75 (m, 7H), 1.61-1.54 (m, 8H), 1.46-1.40 (m, 3H), 0.90 (s, 18H), 0.88 (d,  $J = 0.8$  Hz, 6H), 0.86 (s, 3H), 0.19 (t,  $J = 3.2$  Hz, 12H).  $^{13}\text{C}$  NMR (100 MHz,  $\text{CDCl}_3$ )  $\delta$  161.7, 153.4, 144.9, 139.1, 137.9, 133.2, 130.3, 126.3, 122.7, 120.0, 117.3, 100.9, 82.8, 81.5, 72.9, 50.3, 48.9, 43.9, 40.5, 39.6, 33.4, 32.2, 29.8, 27.5, 27.1, 25.9, 25.8, 25.6, 23.3, 22.2, 18.3, 13.4, 11.3, -2.7, -4.3. HRMS (ESI-TOF)  $m/z$ :  $[\text{M} + \text{H}]^+$  Calcd for  $\text{C}_{51}\text{H}_{81}\text{N}_2\text{O}_5\text{SSi}_2$ : 889.5399, found: 889.5403.

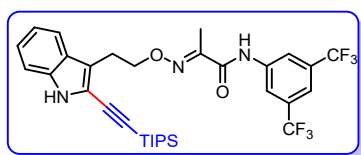

**(*E*)-N-(3,5-Bis(trifluoromethyl)phenyl)-2-((2-(2-((triisopropylsilyl)ethynyl)-1*H*-indol-3-yl)ethoxy)imino)propanamide (31')**,  $^1\text{H}$  NMR (400 MHz,  $\text{CDCl}_3$ )  $\delta$  8.24 (s, 1H), 8.11 (s, 1H), 7.88 (s, 2H), 7.58 (d,  $J = 7.6$  Hz, 2H), 7.21 (d,  $J = 5.6$  Hz, 2H), 4.63 (t,  $J = 6.4$  Hz, 2H), 3.29 (t,  $J = 6.4$  Hz, 2H), 2.03 (s, 3H), 1.14 (s, 21H).  $^{13}\text{C}$  NMR (100 MHz,  $\text{CDCl}_3$ )  $\delta$  161.4, 149.7, 138.9, 135.7, 132.5, 132.2 (q,  $J = 33.5$  Hz), 127.2, 124.6, 124.1 (q,  $J = 3.0$  Hz), 121.9 (q,  $J = 272.8$  Hz), 120.9, 120.4, 119.3 (q,  $J = 4.0$  Hz), 117.9, 117.4 (q,  $J = 3.0$  Hz), 111.2 (d,  $J = 2.0$  Hz), 98.2, 97.9, 75.3, 36.6, 18.8, 11.4, 9.54.  $^{19}\text{F}$  NMR (300 MHz,  $\text{CDCl}_3$ )  $\delta$  -62.9 (6F). HRMS (ESI-TOF)  $m/z$ :  $[\text{M} + \text{H}]^+$  Calcd for  $\text{C}_{32}\text{H}_{38}\text{F}_6\text{N}_3\text{O}_2\text{Si}$ : 638.2632, found: 638.2635.

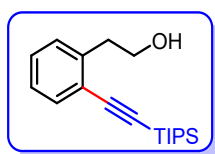

**2-(2-((Triisopropylsilyl)ethynyl)phenyl)ethan-1-ol (3a-1)**,  $^1\text{H}$  NMR (400 MHz,  $\text{CDCl}_3$ )  $\delta$  7.50 (d,  $J = 7.2$  Hz, 1H), 7.27-7.25 (m, 2H), 7.21-7.17 (m, 1H), 3.92-3.91 (m, 2H), 3.09 (t,  $J = 6.4$  Hz, 2H), 1.14 (s, 21H).  $^{13}\text{C}$  NMR (100 MHz,  $\text{CDCl}_3$ )  $\delta$  140.8, 133.2, 129.9, 128.6, 126.5, 123.5, 105.5, 94.8, 63.0, 38.3, 18.8, 11.5. HRMS (ESI-TOF)  $m/z$ :  $[\text{M} + \text{H}]^+$  Calcd for  $\text{C}_{19}\text{H}_{31}\text{OSi}$ : 303.2139, found: 303.2135.

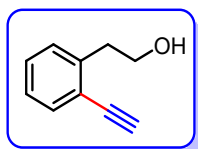

**2-(2-Ethynylphenyl)ethan-1-ol (3a-2),**<sup>1</sup> <sup>1</sup>H NMR (400 MHz, CDCl<sub>3</sub>)  $\delta$  7.50 (d,  $J$  = 3.6 Hz, 1H), 7.30-7.26 (m, 2H), 7.20 (td,  $J$  = 1.6 Hz,  $J$  = 7.6 Hz, 1H), 3.91 (td,  $J$  = 2.0 Hz,  $J$  = 6.8 Hz, 1H), 3.26 (s, 1H), 3.08 (t,  $J$  = 6.4 Hz, 2H). <sup>13</sup>C NMR (100 MHz, CDCl<sub>3</sub>)  $\delta$  141.1, 133.2, 129.1, 126.6, 122.1, 82.3, 81.1, 63.0, 37.9.

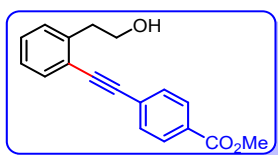

**Methyl 4-((2-(2-hydroxyethyl)phenyl)ethynyl)benzoate (3a-3),** <sup>1</sup>H NMR (400 MHz, CDCl<sub>3</sub>)  $\delta$  7.98 (d,  $J$  = 8.4 Hz, 2H), 7.56-7.51 (m, 3H), 7.28-7.26 (m, 2H), 7.23-7.20 (m, 1H), 3.93 (t,  $J$  = 6.8 Hz, 2H), 3.89 (s, 3H), 3.12 (t,  $J$  = 6.8 Hz, 2H). <sup>13</sup>C NMR (100 MHz, CDCl<sub>3</sub>)  $\delta$  166.6, 140.7, 132.6, 131.4, 129.8, 128.0, 126.5, 122.5, 92.4, 90.9, 62.7, 52.3, 38.0. HRMS (ESI-TOF)  $m/z$ : [M + H]<sup>+</sup> Calcd for C<sub>18</sub>H<sub>17</sub>O<sub>3</sub>: 281.1172, found: 281.1177.

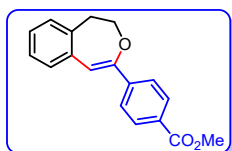

**Methyl 4-(4,5-dihydrobenzo[d]oxepin-2-yl)benzoate (3a-4),** <sup>1</sup>H NMR (400 MHz, CDCl<sub>3</sub>)  $\delta$  7.90 (d,  $J$  = 8.4 Hz, 2H), 7.69 (d,  $J$  = 8.8 Hz, 2H), 7.63-7.60 (m, 1H), 7.20-7.16 (m, 2H), 7.08-7.06 (m, 1H), 4.22 (t,  $J$  = 6.4 Hz, 2H), 3.81 (s, 3H), 2.87 (t,  $J$  = 5.2 Hz, 2H). <sup>13</sup>C NMR (100 MHz, CDCl<sub>3</sub>)  $\delta$  167.3, 152.4, 141.5, 134.4, 130.4, 129.6, 128.6, 128.3, 128.2, 127.2, 126.6, 124.6, 102.5, 65.1, 52.0, 29.5. HRMS (ESI-TOF)  $m/z$ : [M + H]<sup>+</sup> Calcd for C<sub>18</sub>H<sub>17</sub>O<sub>3</sub>: 281.1172, found: 281.1177.

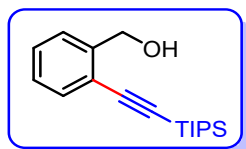

**2-((Triisopropylsilyl)ethynyl)phenylmethanol (5a-1),** <sup>1</sup>H NMR (400 MHz, CDCl<sub>3</sub>)  $\delta$  7.49 (dd,  $J$  = 0.8 Hz,  $J$  = 6.8 Hz, 1H), 7.42 (dd,  $J$  = 0.4 Hz,  $J$  = 7.6 Hz, 1H), 7.33 (td,  $J$  = 1.2 Hz,  $J$  = 7.6 Hz, 1H), 7.24 (td,  $J$  = 1.2 Hz,  $J$  = 7.6 Hz, 1H), 4.85 (d,  $J$  = 6.8 Hz,

2H), 1.14 (d,  $J = 2.0$  Hz, 21H).  $^{13}\text{C}$  NMR (100 MHz,  $\text{CDCl}_3$ )  $\delta$  143.2, 132.9, 127.2, 121.6, 104.5, 96.2, 64.3, 18.8, 11.4. HRMS (ESI-TOF)  $m/z$ :  $[\text{M} + \text{H}]^+$  Calcd for  $\text{C}_{18}\text{H}_{29}\text{OSi}$ : 289.1982, found: 289.1985.

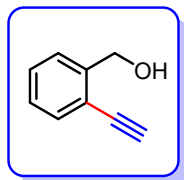

**(2-Ethynylphenyl)methanol (5a-2),**  $^1\text{H}$  NMR (400 MHz,  $\text{CDCl}_3$ )  $\delta$  7.49 (dd,  $J = 0.8$  Hz,  $J = 7.6$  Hz, 1H), 7.45 (dd,  $J = 0.8$  Hz,  $J = 8.0$  Hz, 1H), 7.35 (td,  $J = 1.2$  Hz,  $J = 7.2$  Hz, 1H), 7.24 (td,  $J = 1.2$  Hz,  $J = 8.0$  Hz, 1H), 4.82 (s, 2H), 3.33 (s, 1H).  $^{13}\text{C}$  NMR (100 MHz,  $\text{CDCl}_3$ )  $\delta$  143.4, 132.9, 129.3, 127.4, 127.3, 120.2, 82.1, 81.3, 63.7, 29.8.

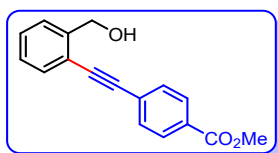

**Methyl 4-((2-(hydroxymethyl)phenyl)ethynyl)benzoate (5a-3),**  $^1\text{H}$  NMR (400 MHz,  $\text{CDCl}_3$ )  $\delta$  8.03 (d,  $J = 8.4$  Hz, 1H), 7.59-7.50 (m, 4H), 7.39 (t,  $J = 7.2$  Hz, 1H), 7.30 (t,  $J = 7.2$  Hz, 1H), 4.93 (s, 2H), 3.93 (s, 3H).  $^{13}\text{C}$  NMR (100 MHz,  $\text{CDCl}_3$ )  $\delta$  166.6, 142.9, 132.5, 132.0, 131.6, 130.7, 129.7, 129.4, 127.7, 127.4, 120.9, 93.4, 89.8, 64.0, 52.4. HRMS (ESI-TOF)  $m/z$ :  $[\text{M} + \text{H}]^+$  Calcd for  $\text{C}_{17}\text{H}_{15}\text{O}_3$ : 267.1016, found: 267.1019.

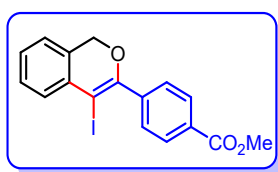

**Methyl 4-(4-iodo-1H-isochromen-3-yl)benzoate (5a-4),**  $^1\text{H}$  NMR (400 MHz,  $\text{CDCl}_3$ )  $\delta$  8.05 (d,  $J = 8.0$  Hz, 2H), 7.59 (d,  $J = 8.4$  Hz, 2H), 7.24 (s, 2H), 7.00-6.96 (m, 1H), 6.48 (d,  $J = 8.0$  Hz, 2H), 5.44 (s, 2H), 3.93 (s, 3H).  $^{13}\text{C}$  NMR (100 MHz,  $\text{CDCl}_3$ )  $\delta$  166.8, 157.7, 145.7, 142.6, 131.0, 130.5, 130.3, 129.9, 129.4, 128.0, 123.2, 121.6, 73.6, 61.6, 52.4. HRMS (ESI-TOF)  $m/z$ :  $[\text{M} + \text{H}]^+$  Calcd for  $\text{C}_{17}\text{H}_{14}\text{IO}_3$ : 392.9982, found: 392.9985.

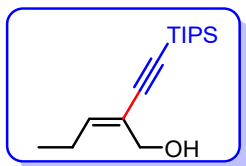

**(Z)-2-((Triisopropylsilyl)ethynyl)pent-2-en-1-ol (7a)**,  $^1\text{H NMR}$  (400 MHz,  $\text{CDCl}_3$ )  $\delta$  5.97 (t,  $J = 7.2$  Hz, 1H), 4.10 (s, 2H), 2.37-2.30 (m, 1H), 1.09 (s, 21H), 1.02 (t,  $J = 7.6$  Hz, 3H).  $^{13}\text{C NMR}$  (100 MHz,  $\text{CDCl}_3$ )  $\delta$  141.0, 123.0, 103.3, 96.6, 66.1, 23.9, 18.8, 13.5, 11.4. HRMS (ESI-TOF)  $m/z$ :  $[\text{M} + \text{H}]^+$  Calcd for  $\text{C}_{16}\text{H}_{31}\text{OSi}$ : 267.2139, found: 267.2137.

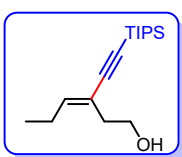

**(E)-3-((Triisopropylsilyl)ethynyl)hex-3-en-1-ol (7b)**,  $^1\text{H NMR}$  (400 MHz,  $\text{CDCl}_3$ )  $\delta$  6.06 (t,  $J = 7.2$  Hz, 1H), 3.83 (t,  $J = 6.0$  Hz, 2H), 2.42 (t,  $J = 6.4$  Hz, 2H), 2.18-2.11 (m, 2H), 1.09-1.08 (m, 21H), 1.00 (t,  $J = 7.6$  Hz, 3H).  $^{13}\text{C NMR}$  (100 MHz,  $\text{CDCl}_3$ )  $\delta$  143.3, 119.1, 108.8, 88.2, 61.4, 33.9, 21.9, 18.8, 13.8, 11.4. HRMS (ESI-TOF)  $m/z$ :  $[\text{M} + \text{H}]^+$  Calcd for  $\text{C}_{17}\text{H}_{33}\text{OSi}$ : 281.2295, found: 281.2291.

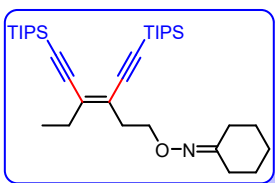

**(Z)-Cyclohexanone O-(4-ethyl-6-((triisopropylsilyl)-3-((triisopropylsilyl) ethynyl) hex-3-en-5-yn-1-yl) oxime (7c)**,  $^1\text{H NMR}$  (400 MHz,  $\text{CDCl}_3$ )  $\delta$  4.19 (t,  $J = 7.2$  Hz, 2H), 2.79 (t,  $J = 7.2$  Hz, 2H), 2.44-2.42 (m, 2H), 2.17 (t,  $J = 6.0$  Hz, 2H), 1.65-1.63 (m, 2H), 1.58-1.55 (m, 4H), 1.12-1.11 (m, 3H), 1.09-1.08 (m, 42H).  $^{13}\text{C NMR}$  (100 MHz,  $\text{CDCl}_3$ )  $\delta$  160.0, 133.7, 126.0, 105.6, 105.5, 101.3, 101.0, 71.2, 35.0, 32.2, 28.6, 27.1, 25.9, 25.8, 25.3, 18.5, 12.8, 11.3. HRMS (ESI-TOF)  $m/z$ :  $[\text{M} + \text{H}]^+$  Calcd for  $\text{C}_{34}\text{H}_{62}\text{NOSi}_2$ : 556.4364, found: 556.4367.

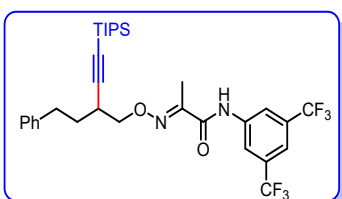



**(E)-N-(3,5-Bis(trifluoromethyl)phenyl)-2-(((2-phenethyl-4-(triisopropylsilyl)but-3-yn-1-yl)oxy)imino)propanamide (10a-3)**,  $^1\text{H NMR}$  (400 MHz,  $\text{CDCl}_3$ )  $\delta$  8.72 (s, 1H), 8.10 (s, 2H), 7.62 (s, 1H), 7.30-7.27 (m, 2H), 7.21-7.15 (m, 3H), 4.39-4.34 (m, 1H), 4.31-4.23 (m, 1H), 3.01-2.94 (m, 1H), 2.92-2.85 (m, 1H), 2.83-2.77 (m, 1H), 2.11 (s, 3H), 1.84-1.78 (m, 2H), 1.11-1.09 (m, 21H).  $^{13}\text{C NMR}$  (100 MHz,  $\text{CDCl}_3$ )  $\delta$  161.2 (d,  $J = 25.0$  Hz), 150.4 (d,  $J = 69.0$  Hz), 141.7 (d,  $J = 46.0$  Hz), 138.8 (d,  $J = 10.0$  Hz), 132.4 (q,  $J = 33.0$  Hz), 128.4 (q,  $J = 5.0$  Hz), 126.5 (q,  $J = 125.0$  Hz), 126.1, 124.5 (q,  $J = 272.8$  Hz), 121.7, 119.3 (d,  $J = 3.0$  Hz), 128.3 (d,  $J = 3.0$  Hz), 119.0, 117.4 (q,  $J = 4.0$  Hz), 107.6, 83.8, 77.8, 33.2, 33.1, 32.5, 18.6, 11.2, 9.6.  $^{19}\text{F NMR}$  (300 MHz,  $\text{CDCl}_3$ )  $\delta$  -63.0 (6F). HRMS (ESI-TOF)  $m/z$ :  $[\text{M} + \text{H}]^+$  Calcd for  $\text{C}_{32}\text{H}_{41}\text{F}_6\text{N}_2\text{O}_2\text{Si}$ : 627.2836, found: 627.2839. HRMS (ESI-TOF)  $m/z$ :  $[\text{M} + \text{H}]^+$  Calcd for  $\text{C}_{32}\text{H}_{41}\text{F}_6\text{N}_2\text{O}_2\text{Si}$ : 627.2836, found: 627.2839.

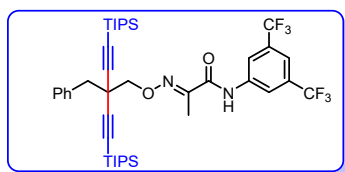

**(E)-2-(((2-Benzyl-4-(triisopropylsilyl)-2-((triisopropylsilyl)ethynyl)but-3-yn-1-yl)oxy)imino)-N-(3,5-bis(trifluoromethyl)phenyl)propanamide (10b)**,  $^1\text{H NMR}$  (400 MHz,  $\text{CDCl}_3$ )  $\delta$  8.87 (s, 1H), 8.06 (s, 1H), 7.98-7.96 (m, 2H), 7.60 (s, 1H), 7.36-7.32 (m, 3H), 5.31 (s, 2H), 2.15 (s, 3H), 1.57 (s, 2H), 1.12-1.09 (m, 21H), 1.02-1.00 (m, 21H).  $^{13}\text{C NMR}$  (100 MHz,  $\text{CDCl}_3$ )  $\delta$  161.3, 150.6, 139.0, 136.7, 132.7, 132.4 (q,  $J = 33.0$  Hz), 129.0 (q,  $J = 3.0$  Hz), 128.0, 125.2 (q,  $J = 4.0$  Hz), 124.6 (q,  $J = 272.2$  Hz), 121.9, 119.4 (q,  $J = 4.0$  Hz), 117.5 (q,  $J = 4.0$  Hz), 105.0, 104.8, 104.7, 104.4, 77.6, 29.8, 18.8, 18.7, 11.5, 11.4, 9.7.  $^{19}\text{F NMR}$  (300 MHz,  $\text{CDCl}_3$ )  $\delta$  -63.0 (6F). HRMS (ESI-TOF)  $m/z$ :  $[\text{M} + \text{H}]^+$  Calcd for  $\text{C}_{42}\text{H}_{59}\text{F}_6\text{N}_2\text{O}_2\text{Si}_2$ : 793.4014, found: 793.4017.

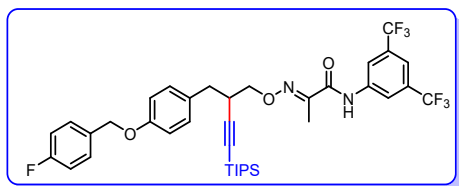

**(E)-N-(3,5-Bis(trifluoromethyl)phenyl)-2-(((2-(4-((4-fluorobenzyl)oxy)benzyl)-4-(triisopropylsilyl)but-3-yn-1-yl)oxy)imino)propanamide (10c)**,  $^1\text{H NMR}$  (400

**MHz, CDCl<sub>3</sub>)**  $\delta$  8.82 (s, 1H), 8.13 (s, 2H), 7.62 (s, 1H), 7.42-7.38 (m, 2H), 7.21 (d,  $J = 8.4$  Hz, 2H), 7.07 (t,  $J = 8.8$  Hz, 2H), 6.90 (d,  $J = 8.4$  Hz, 2H), 5.00 (s, 2H), 4.37-4.33 (m, 1H), 4.29-4.25 (m, 1H), 3.17-3.11 (m, 1H), 2.93-2.88 (m, 1H), 2.82-2.77 (m, 1H), 2.15 (s, 3H), 1.03 (d,  $J = 3.6$  Hz, 21H). **<sup>13</sup>C NMR (100 MHz, CDCl<sub>3</sub>)**  $\delta$  161.0, 157.5, 150.8, 138.8, 132.8(d,  $J = 3.0$  Hz), 132.5 (q,  $J = 32.0$  Hz), 130.7, 130.5 (d,  $J = 4.0$  Hz), 129.2 (d,  $J = 8.0$  Hz), 128.5, 123.1 (q,  $J = 271.0$  Hz), 119.3 (d,  $J = 2.0$  Hz), 117.5 (q,  $J = 4.0$  Hz), 115.6, 115.4, 114.7, 107.3, 84.2, 69.4, 60.4, 36.7, 35.0, 18.6, 11.2, 9.6. **<sup>19</sup>F NMR (300 MHz, CDCl<sub>3</sub>)**  $\delta$  -63.0, -114.3. HRMS (ESI-TOF)  $m/z$ : [M + H]<sup>+</sup> Calcd for C<sub>38</sub>H<sub>44</sub>F<sub>7</sub>N<sub>2</sub>O<sub>3</sub>Si: 737.3004, found: 737.3008.

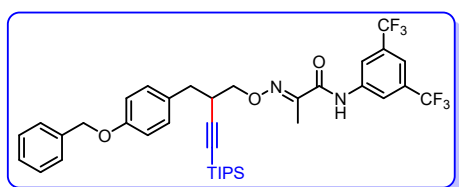

**(E)-N-(3,5-Bis(trifluoromethyl)phenyl)-2-(((2-(4-phenoxybenzyl)-4-(triisopropylsilyl)but-3-yn-1-yl)oxy)imino)propanamide (10d)**, **<sup>1</sup>H NMR (400 MHz, CDCl<sub>3</sub>)**  $\delta$  8.81 (s, 1H), 8.13 (s, 2H), 7.63 (s, 1H), 7.45-7.37 (m, 5H), 7.21 (d,  $J = 8.4$  Hz, 2H), 6.92 (d,  $J = 8.4$  Hz, 2H), 5.05 (s, 2H), 4.37-4.33 (m, 1H), 4.29-4.25 (m, 1H), 3.17-3.10 (m, 1H), 2.92-2.87 (m, 1H), 2.83-2.77 (m, 1H), 2.15 (s, 3H), 1.03 (s, 21H). **<sup>13</sup>C NMR (100 MHz, CDCl<sub>3</sub>)**  $\delta$  161.2, 157.8, 150.9, 138.9, 137.2, 132.5 (q,  $J = 33.0$  Hz), 130.7, 130.5, 128.7, 128.1, 127.6, 126.2 (q,  $J = 271.0$  Hz), 124.6 (q,  $J = 3.7$  Hz), 124.1, 121.9, 119.5 (q,  $J = 4.5$  Hz), 117.6 (q,  $J = 4.0$  Hz), 114.8, 107.5, 100.1, 84.3, 70.2, 36.8, 35.1, 18.7, 11.3, 9.7. **<sup>19</sup>F NMR (300 MHz, CDCl<sub>3</sub>)**  $\delta$  -63.0. HRMS (ESI-TOF)  $m/z$ : [M + H]<sup>+</sup> Calcd for C<sub>38</sub>H<sub>45</sub>F<sub>6</sub>N<sub>2</sub>O<sub>3</sub>Si: 719.3098, found: 719.3002.

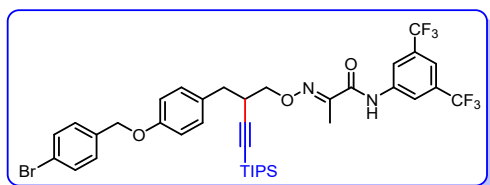

**(E)-N-(3,5-Bis(trifluoromethyl)phenyl)-2-(((2-(4-(4-bromobenzyl)oxy)benzyl)-4-(triisopropylsilyl)but-3-yn-1-yl)oxy)imino)propanamide (10e)**, **<sup>1</sup>H NMR (400 MHz, CDCl<sub>3</sub>)**  $\delta$  8.72 (s, 1H), 8.04 (s, 2H), 7.54 (s, 1H), 7.41 (d,  $J = 8.0$  Hz, 2H), 7.32-7.22 (m, 3H), 7.12 (d,  $J = 8.8$  Hz, 2H), 6.83-6.73 (m, 2H), 4.93 (d,  $J = 21.2$  Hz, 2H),

4.28 (m, 1H), 4.20-4.16 (m, 1H), 3.08-3.01 (m, 1H), 2.83-2.78 (m, 1H), 2.73-2.67 (m, 1H), 2.05 (s, 3H), 0.94 (s, 21H). <sup>13</sup>C NMR (100 MHz, CDCl<sub>3</sub>) δ 161.2, 157.5, 150.9, 138.9, 137.2, 136.3, 132.6 (d, *J* = 34.0 Hz), 131.8, 130.9, 130.6 (d, *J* = 5.6 Hz), 126.0 (d, *J* = 270Hz), 129.1, 128.7, 128.1, 127.6, 124.6 (d, *J* = 4.0 Hz), 122.02, 121.9, 119.5 (d, *J* = 4.0 Hz), 117.6 (q, *J* = 3.0 Hz), 114.8 (d, *J* = 2.0 Hz), 107.4, 84.3, 70.2, 69.4, 36.8, 35.1, 18.7, 11.3, 9.7. <sup>19</sup>F NMR (300 MHz, CDCl<sub>3</sub>) δ -63.0. HRMS (ESI-TOF) *m/z*: [M + H]<sup>+</sup> Calcd for C<sub>38</sub>H<sub>44</sub>BrF<sub>6</sub>N<sub>2</sub>O<sub>3</sub>Si: 797.2203, found: 797.2207.

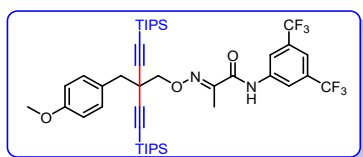

**(*E*)-N-(3,5-Bis(trifluoromethyl)phenyl)-2-(((2-(4-methoxybenzyl)-4-(triisopropylsilyl)but-3-yn-1-yl)oxy)imino)propanamide (10f),**

<sup>1</sup>H NMR (400 MHz, CDCl<sub>3</sub>) δ 8.90 (s, 1H), 8.06 (s, 2H), 8.03 (dd, *J* = 2.0 Hz, *J* = 6.8 Hz, 2H), 7.60 (s, 1H), 6.86 (dd, *J* = 2.0 Hz, *J* = 7.2 Hz, 2H), 5.31 (s, 2H), 3.83 (s, 3H), 2.15 (s, 3H), 1.41 (s, 2H), 1.10 (d, *J* = 3.6 Hz, 21H), 1.03 (d, *J* = 2.4 Hz, 21H). <sup>13</sup>C NMR (100 MHz, CDCl<sub>3</sub>) δ 161.3, 160.2, 150.4, 139.0, 132.5 (q, *J* = 33.0 Hz), 131.9, 130.5, 129.1, 123.3 (q, *J* = 271.0 Hz), 123.2, 119.4 (d, *J* = 3.0 Hz), 117.5 (q, *J* = 4.0 Hz), 113.3, 105.6, 104.9, 104.4, 104.1, 77.9, 55.4, 25.5, 18.7, 17.8, 11.4, 9.6. <sup>19</sup>F NMR (300 MHz, CDCl<sub>3</sub>) δ -63.1. HRMS (ESI-TOF) *m/z*: [M + H]<sup>+</sup> Calcd for C<sub>43</sub>H<sub>61</sub>F<sub>6</sub>N<sub>2</sub>O<sub>3</sub>Si<sub>2</sub>: 823.4119, found: 823.4116.

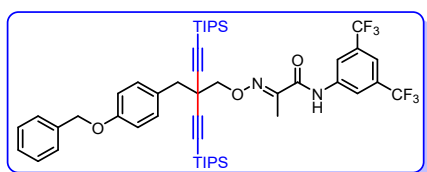

**(*E*)-2-(((2-(4-(Benzyloxy)benzyl)-4-(triisopropylsilyl)but-3-yn-1-yl)oxy)imino)-N-(3,5-bis(trifluoromethyl)phenyl)propanamide (10g),**  
<sup>1</sup>H NMR (400 MHz, CDCl<sub>3</sub>) δ 8.87 (s, 1H), 8.05 (s, 2), 8.01 (d, *J* = 8.8 Hz, 2H), 7.60 (s, 1H), 7.44-7.37 (m, 5H), 6.94 (d, *J* = 9.2 Hz, 2H), 5.30 (s, 2H), 5.09 (s, 2H), 2.14 (s, 3H), 2.09 (s, 2H), 1.10 (d, *J* = 8.0 Hz, 21H), 1.01 (d, *J* = 2.0 Hz, 21H). <sup>13</sup>C NMR (100 MHz, CDCl<sub>3</sub>) δ 161.3, 159.4, 150.5, 139.0, 136.9, 132.5 (q, *J* = 33.0Hz), 130.5, 125.9

(q,  $J = 271.0$  Hz), 129.6, 129.4, 128.7 (d,  $J = 5.0$  Hz), 128.2, 128.1, 127.6, 123.2, 119.4 (q,  $J = 4.0$  Hz), 115.0, 114.2, 105.5, 104.9, 104.4, 104.2, 77.9, 70.2, 32.0, 29.8, 18.7, 17.8, 11.5, 11.4, 9.7,  $^{19}\text{F}$  NMR (300 MHz,  $\text{CDCl}_3$ )  $\delta$  -63.0. HRMS (ESI-TOF)  $m/z$ :  $[\text{M} + \text{H}]^+$  Calcd for  $\text{C}_{49}\text{H}_{65}\text{F}_6\text{N}_2\text{O}_3\text{Si}_2$ : 899.4432, found: 899.4435.

## E. References

- 1) K. Hiroya, R. Jouka, M. Kameda, A. Yasuhara, T. Sakamoto, *Tetrahedron*, **2001**, 57, 9697.
- 2) L. A. Aronica, L. Giannotti, S. Giuntini, A. M. Caporusso, *Eur. J. Org. Chem.*, **2014**, 6858.

## F. NMR spectra

### Propan-2-one *O*-(2-((triisopropylsilyl)ethynyl)phenethyl) oxime (3a)

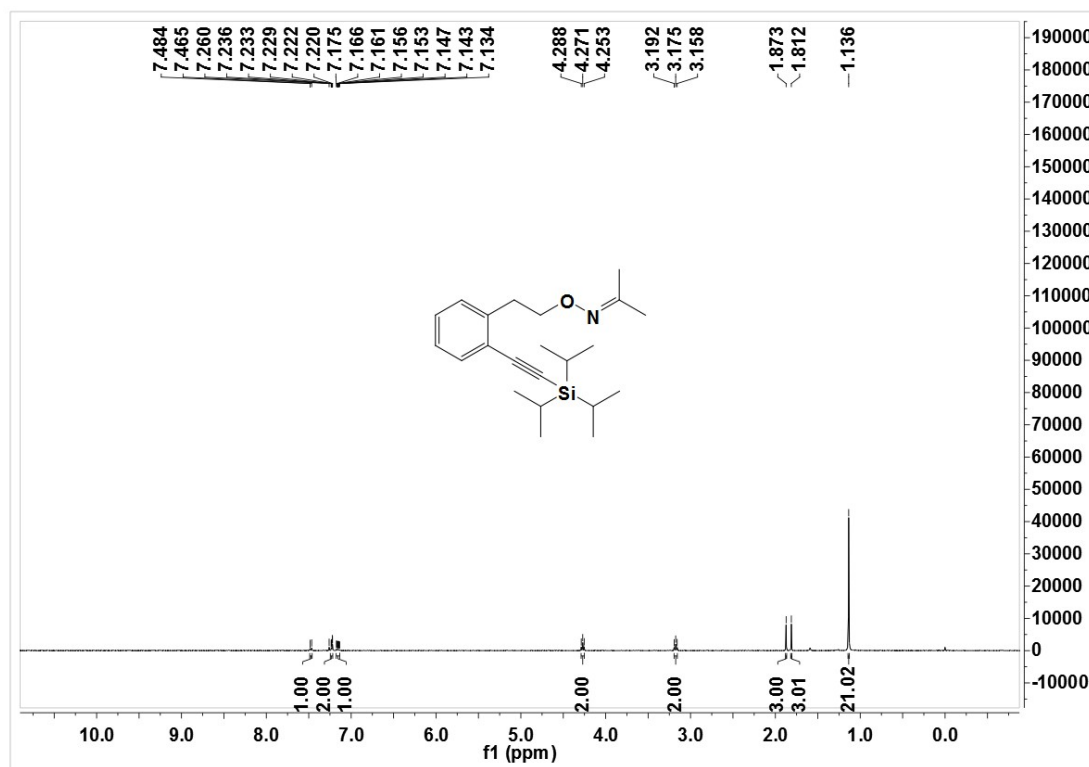

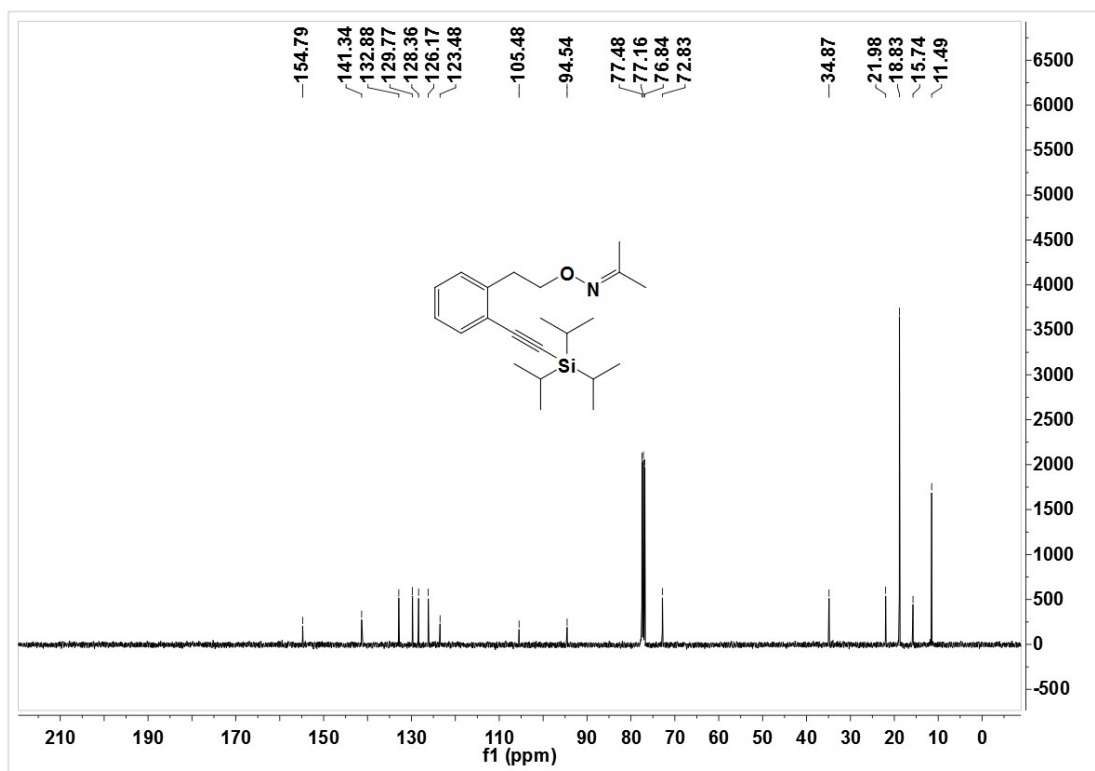

Cyclohexanone *O*-(2-((triisopropylsilyl)ethynyl)phenethyl) oxime (3b)

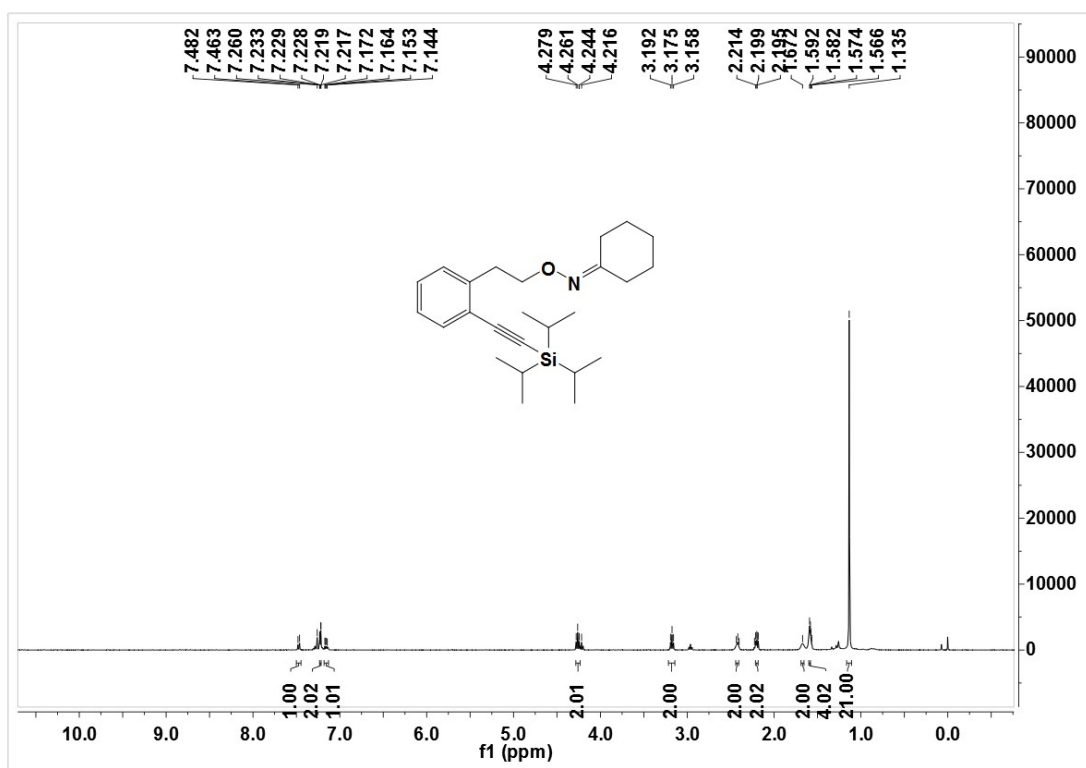

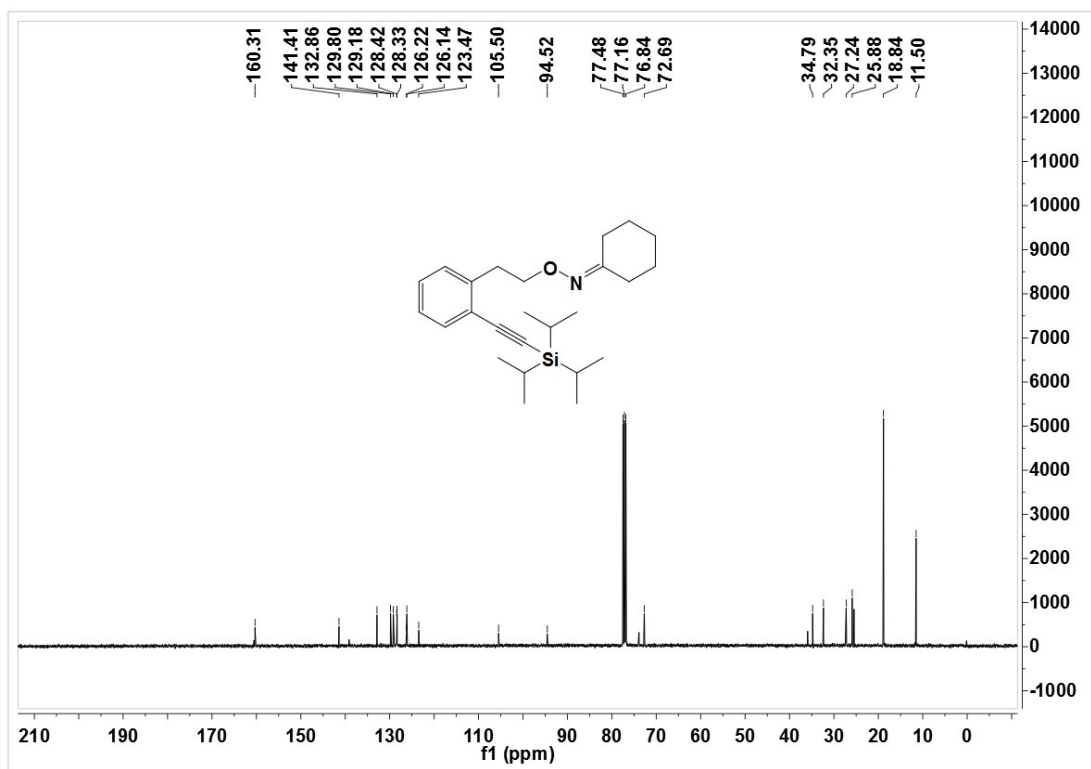

Pentan-3-one *O*-(2-((triisopropylsilyl)ethynyl)phenethyl) oxime (3c)

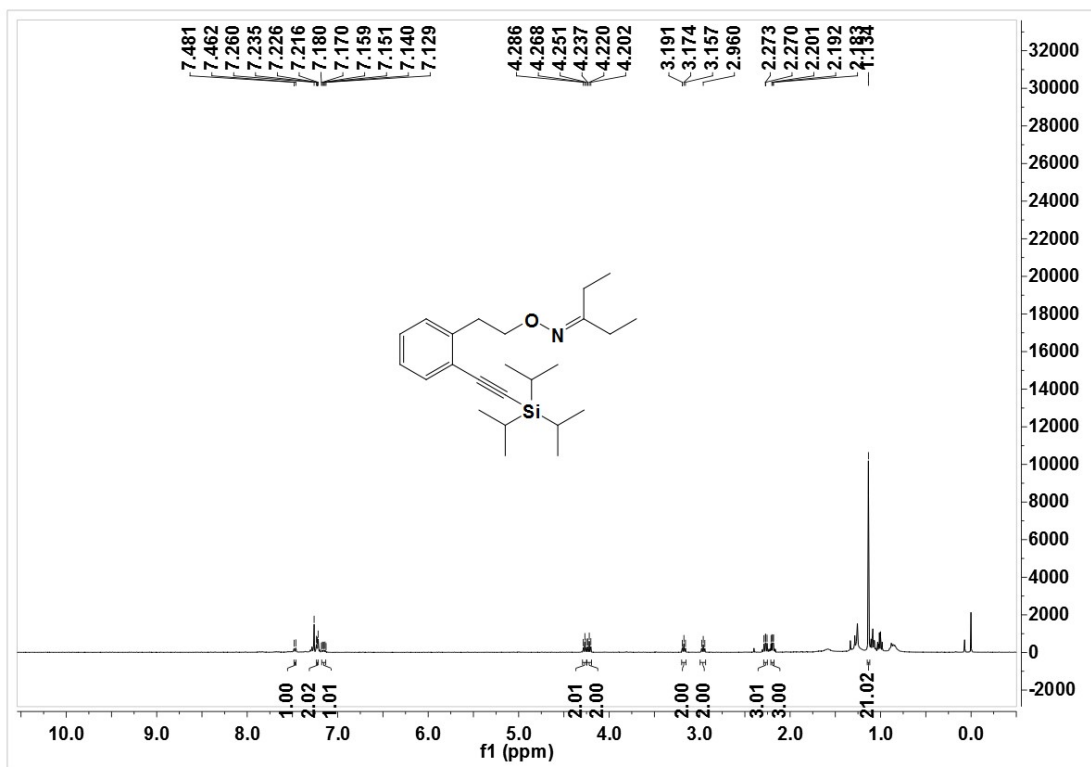

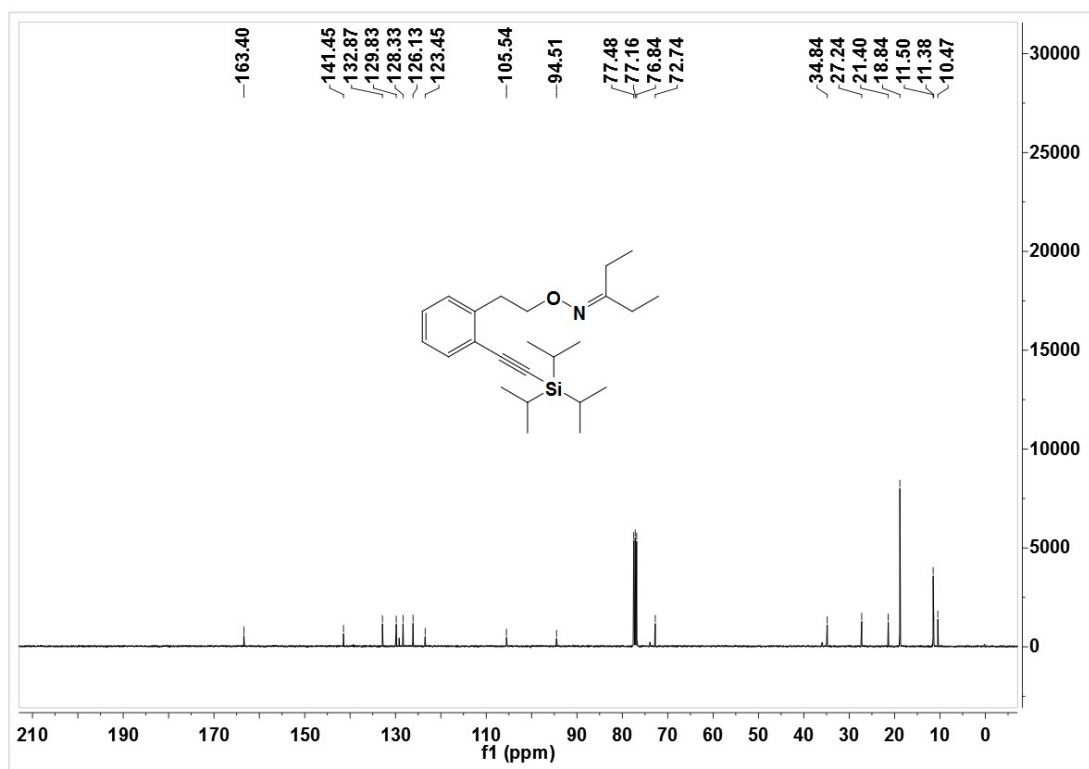

Cyclobutanone *O*-(2-((triisopropylsilyl)ethynyl)phenethyl) oxime (3d)

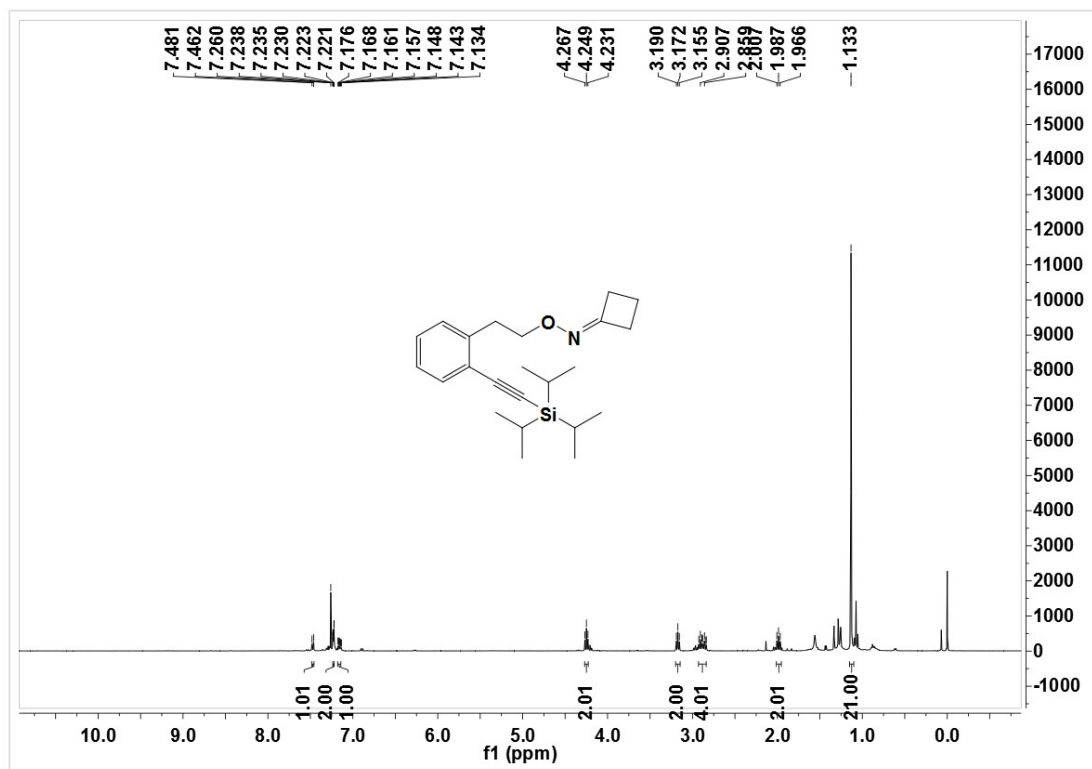

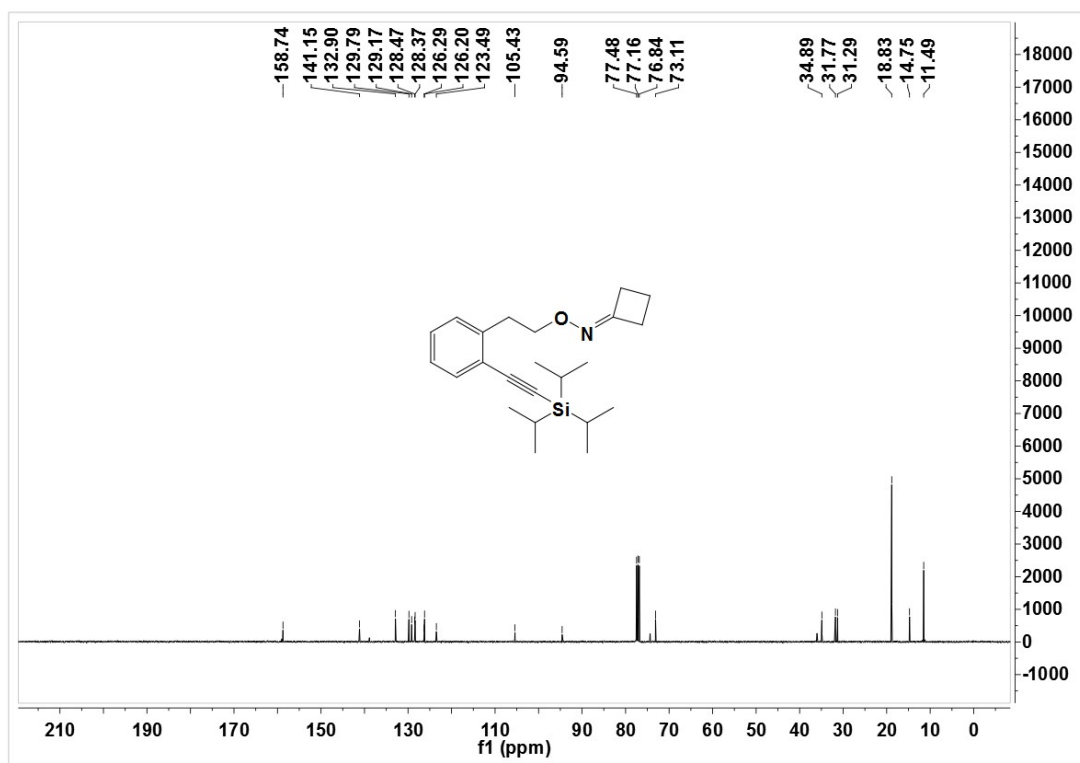

**Cycloheptanone *O*-(2-((triisopropylsilyl)ethynyl)phenethyl) oxime (3e)**

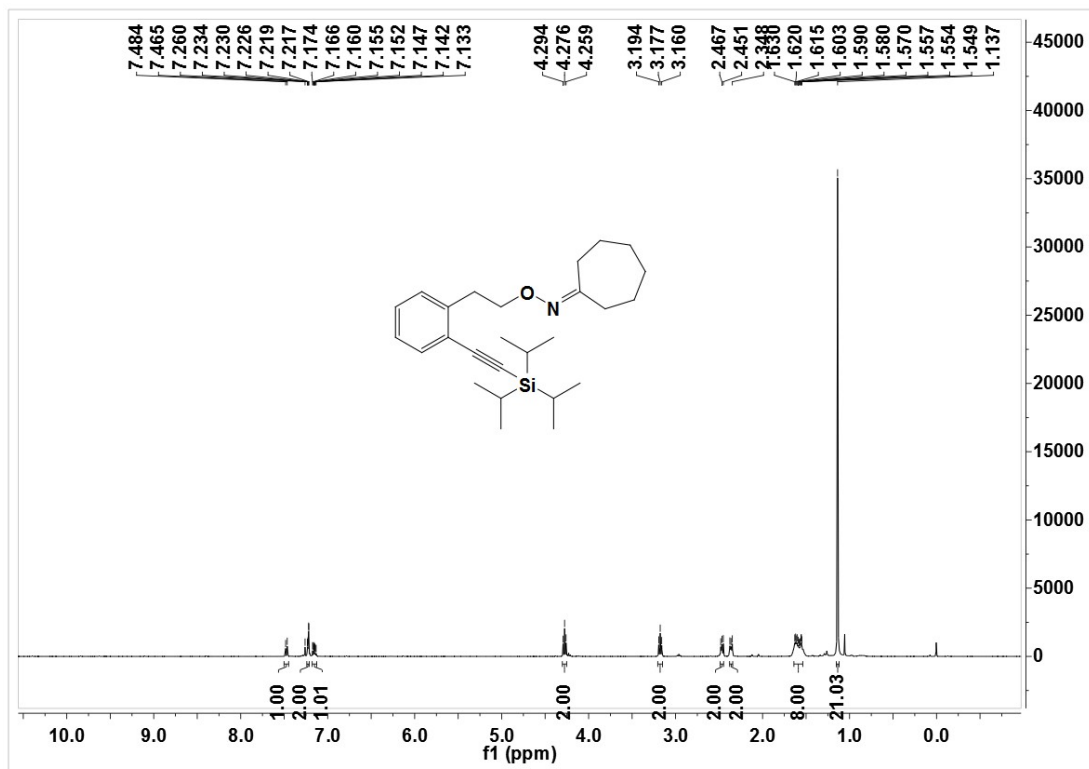



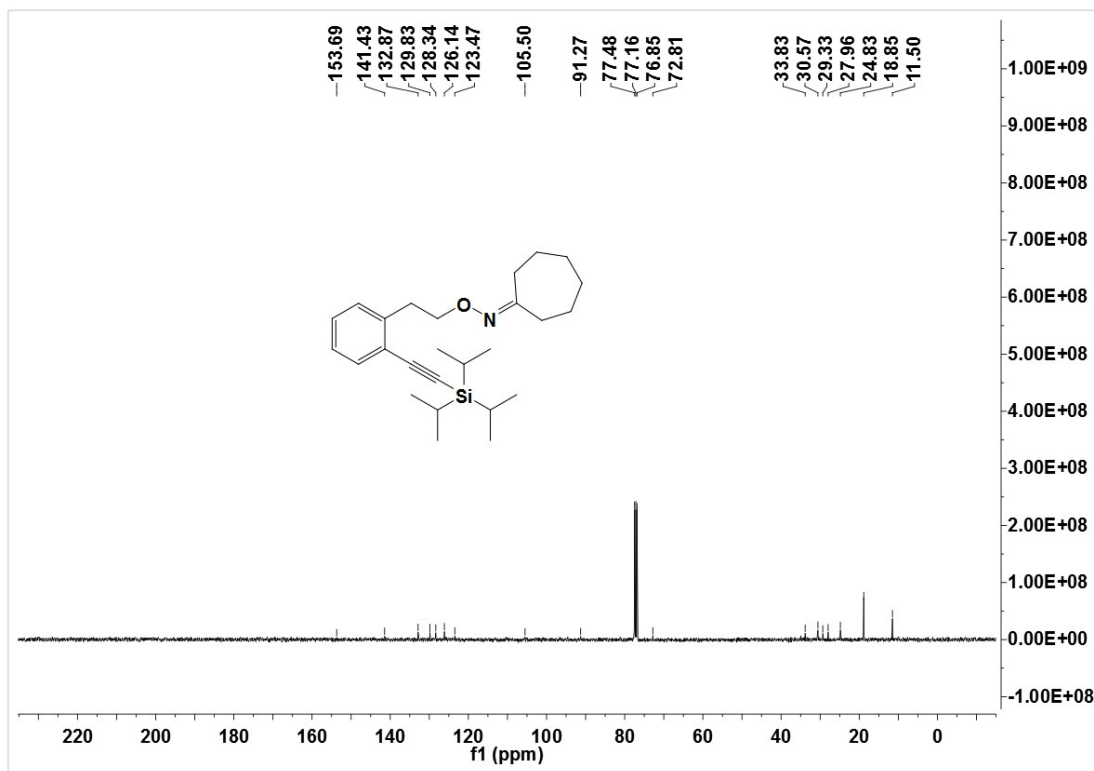

Propan-2-one *O*-(4-bromo-2-((triisopropylsilyl)ethynyl)phenethyl) oxime (3f)

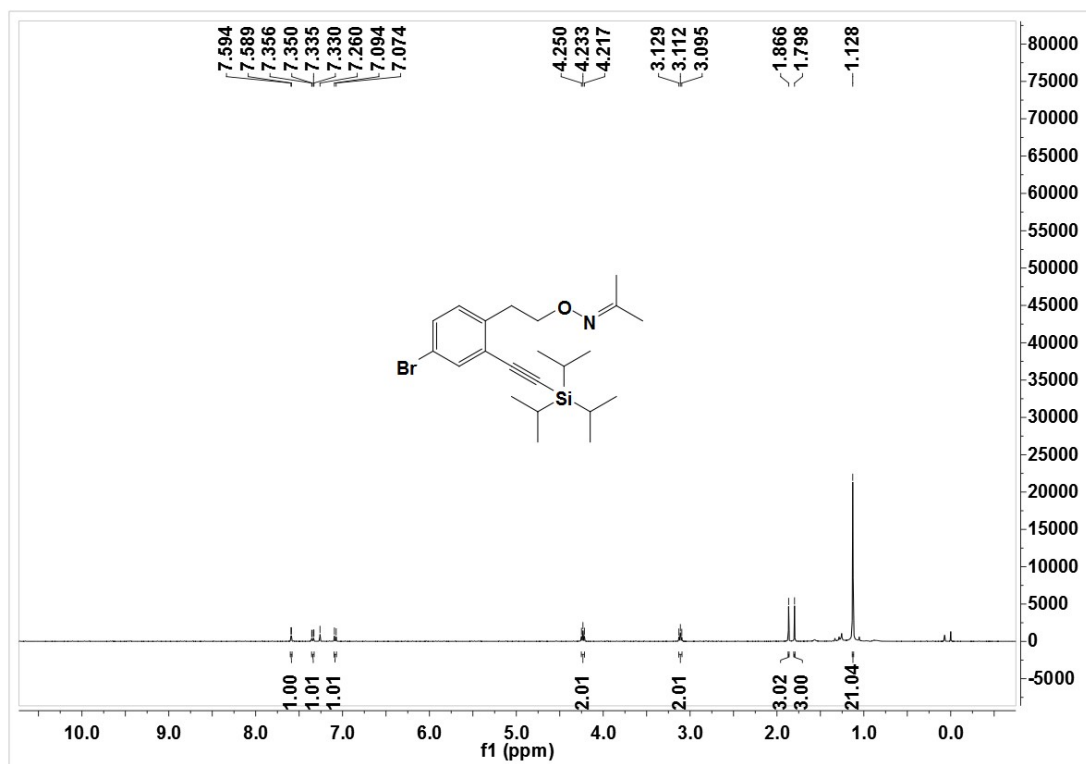

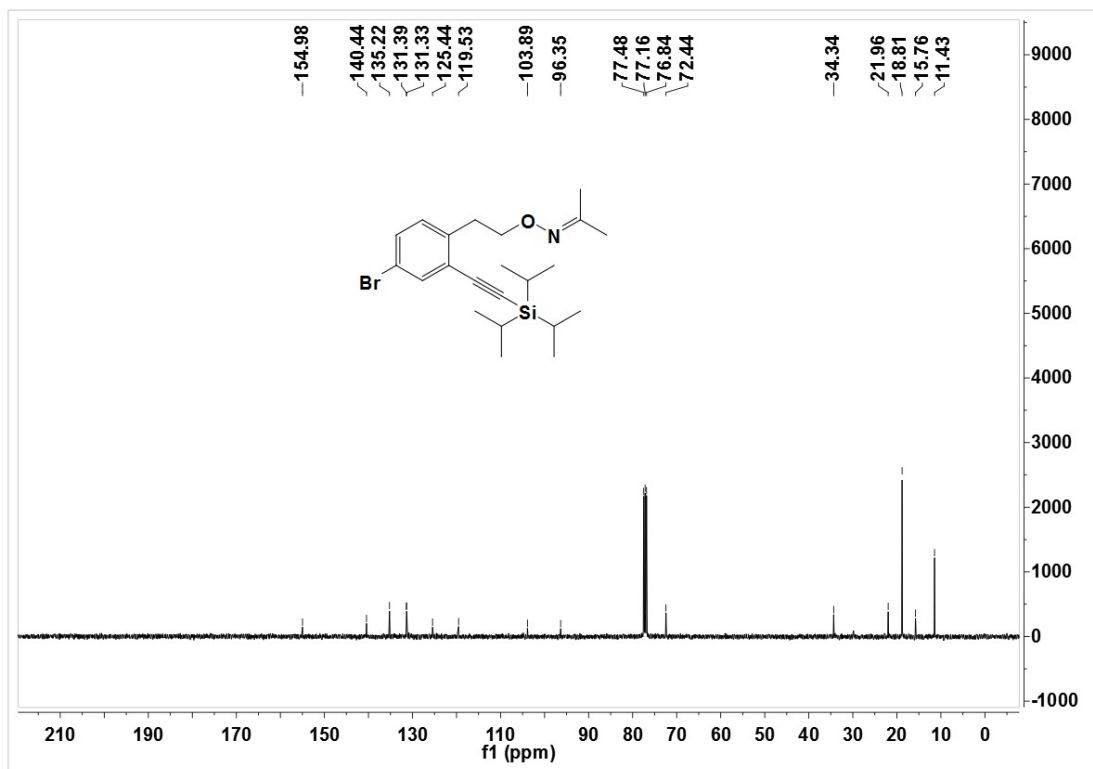

Propan-2-one *O*-(4-methoxy-2-((triisopropylsilyl)ethynyl)phenethyl) oxime (3g)

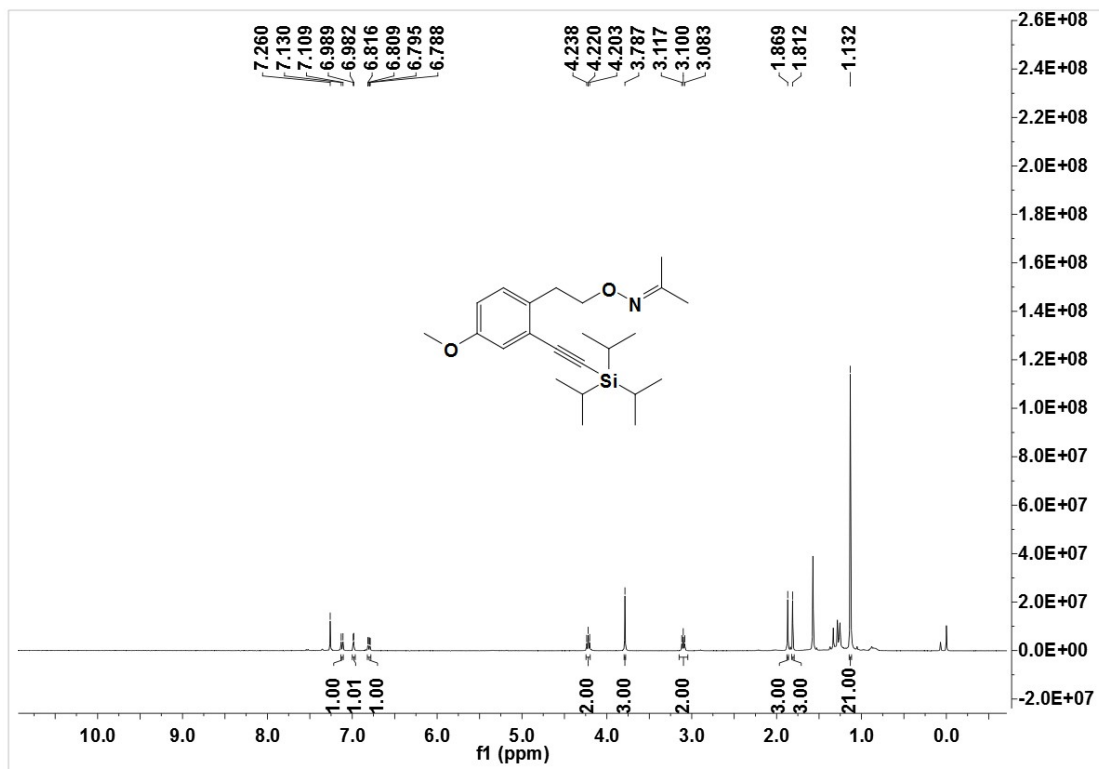

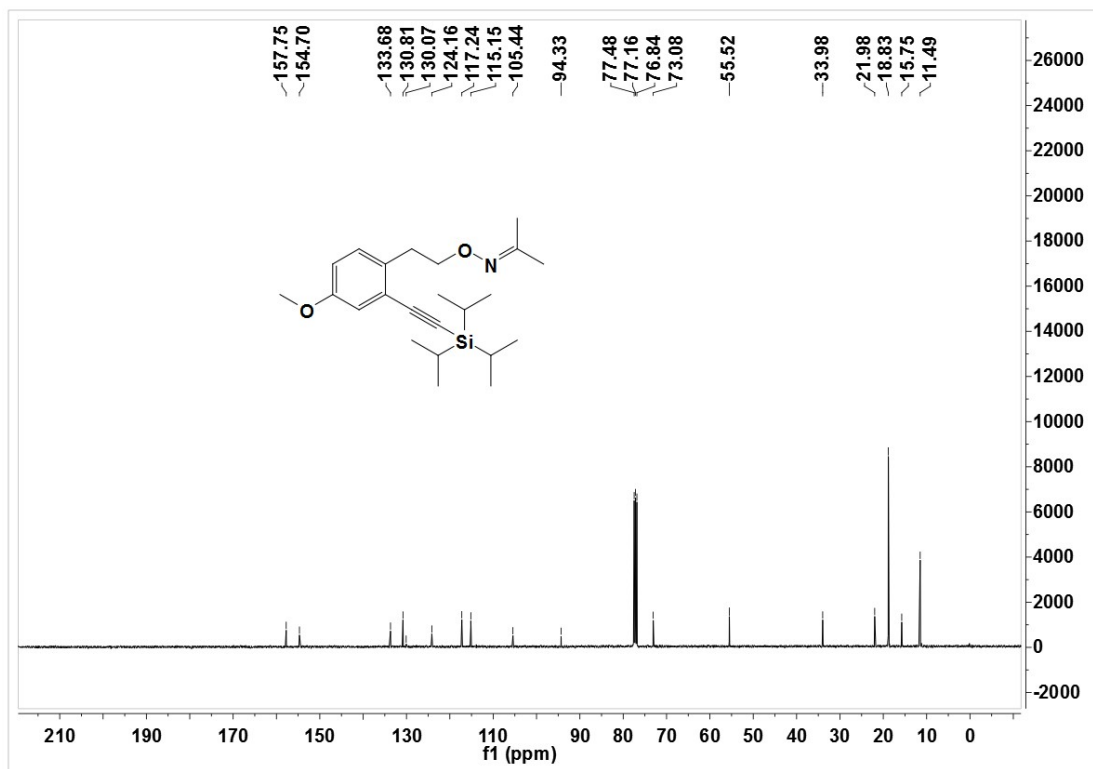

Propan-2-one *O*-(4-chloro-2-((triisopropylsilyl)ethynyl)phenethyl) oxime (3h)

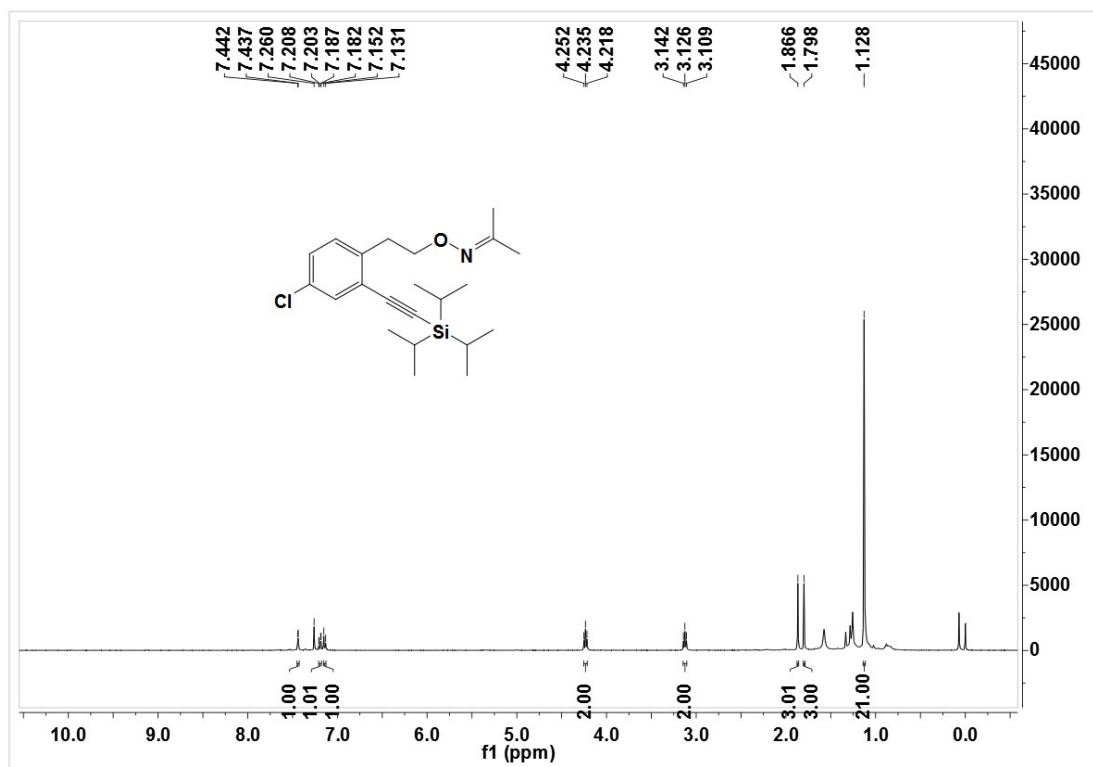

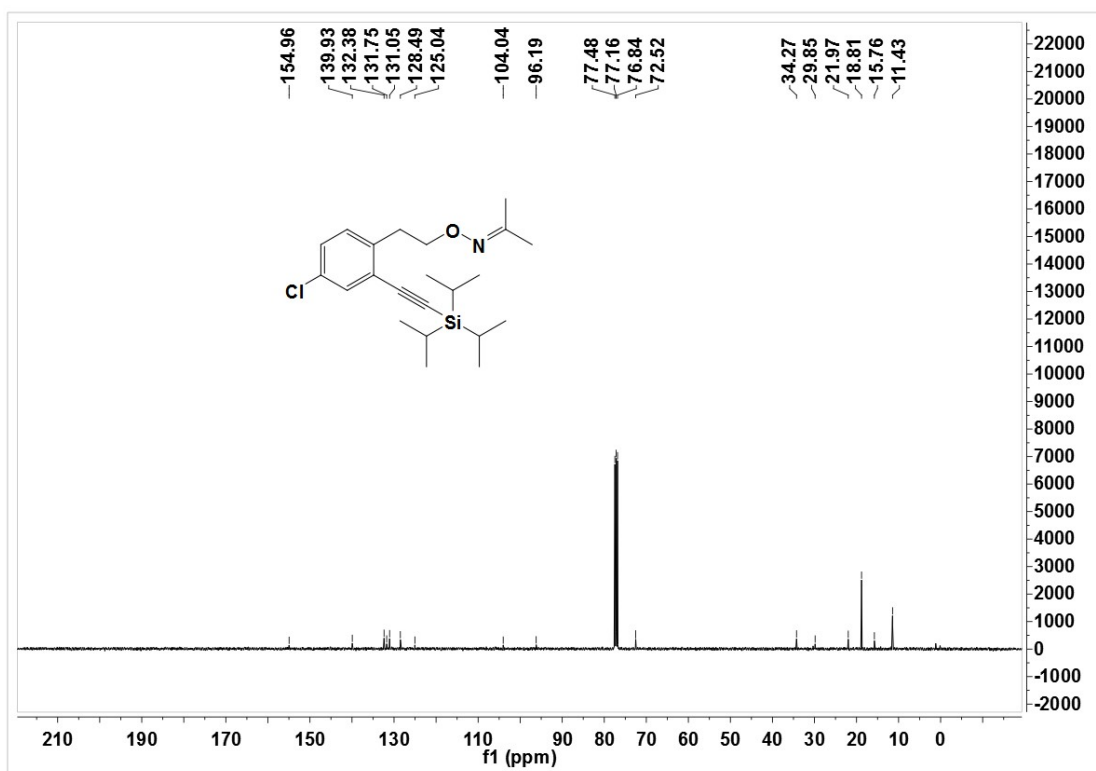

Propan-2-one *O*-(4-nitro-2-((triisopropylsilyl)ethynyl)phenethyl) oxime (3i)

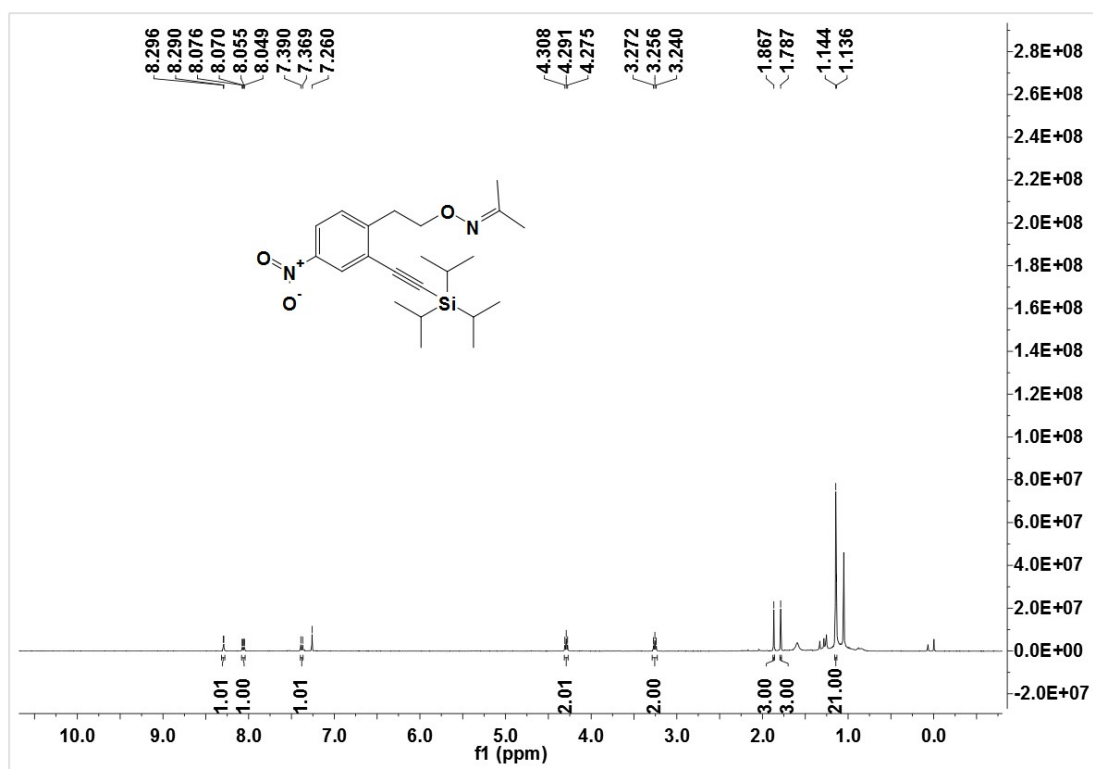

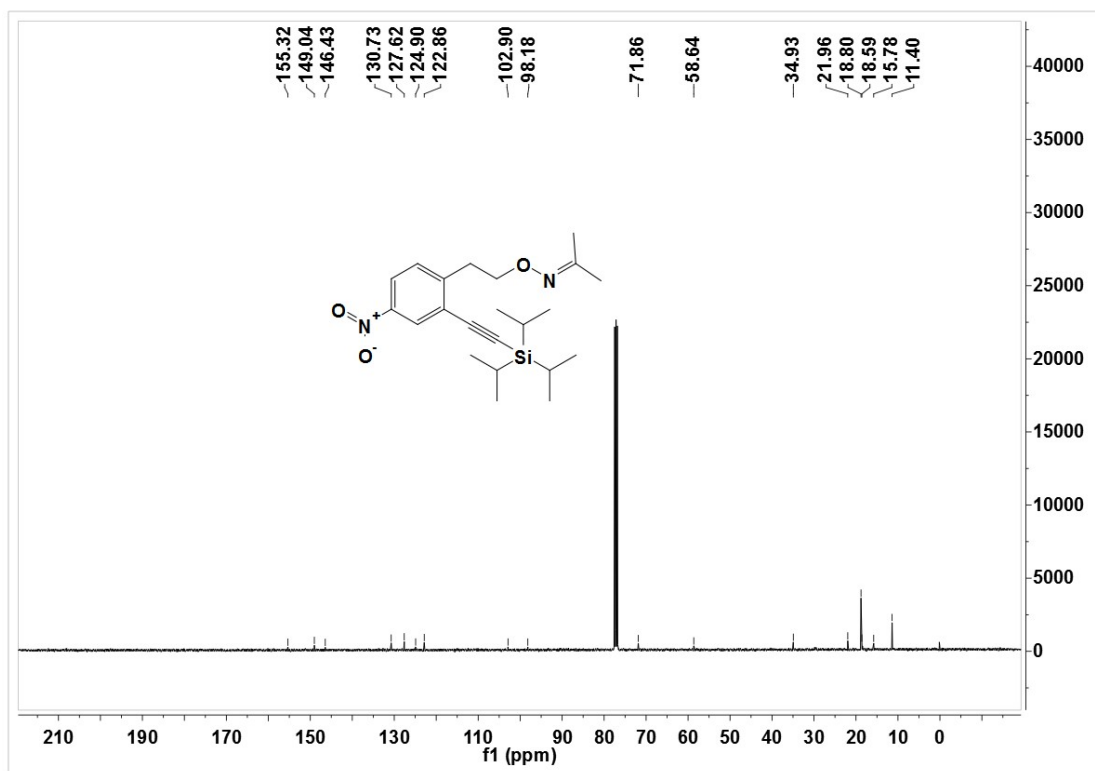

**Propan-2-one *O*-(2-((1-((tert-butyltrimethylsilyloxy) cyclohexyl) ethynyl)-4-methoxyphenethyl) oxime (3j)**

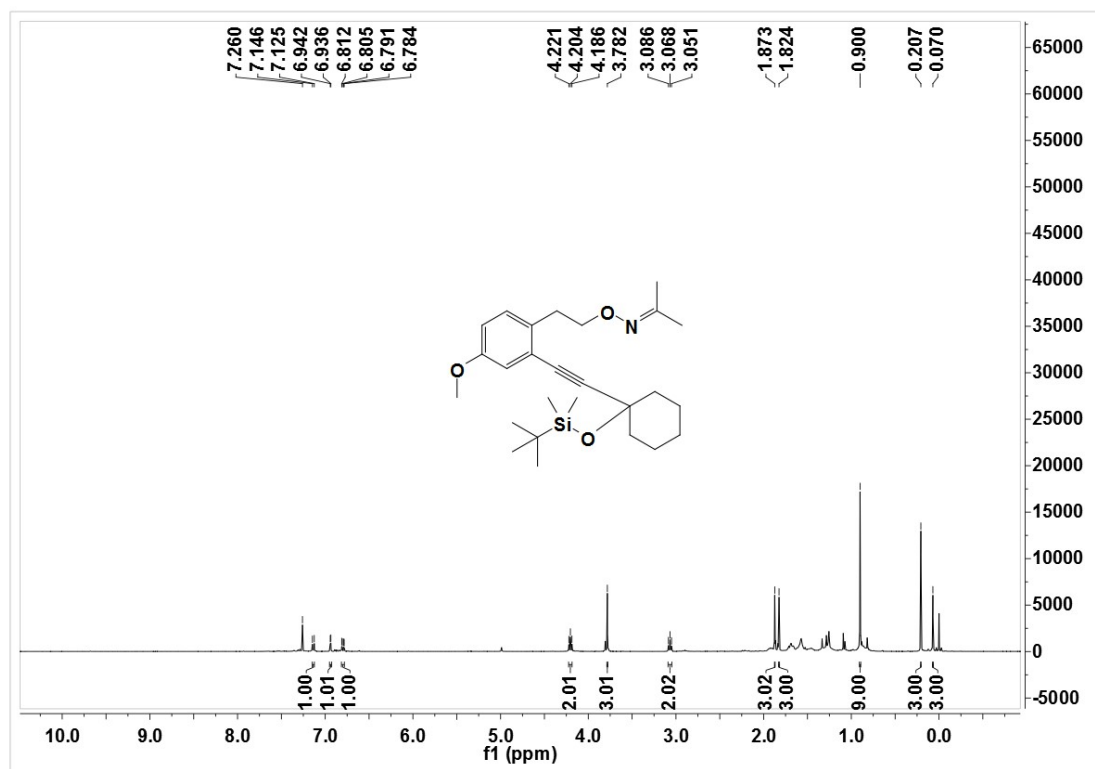

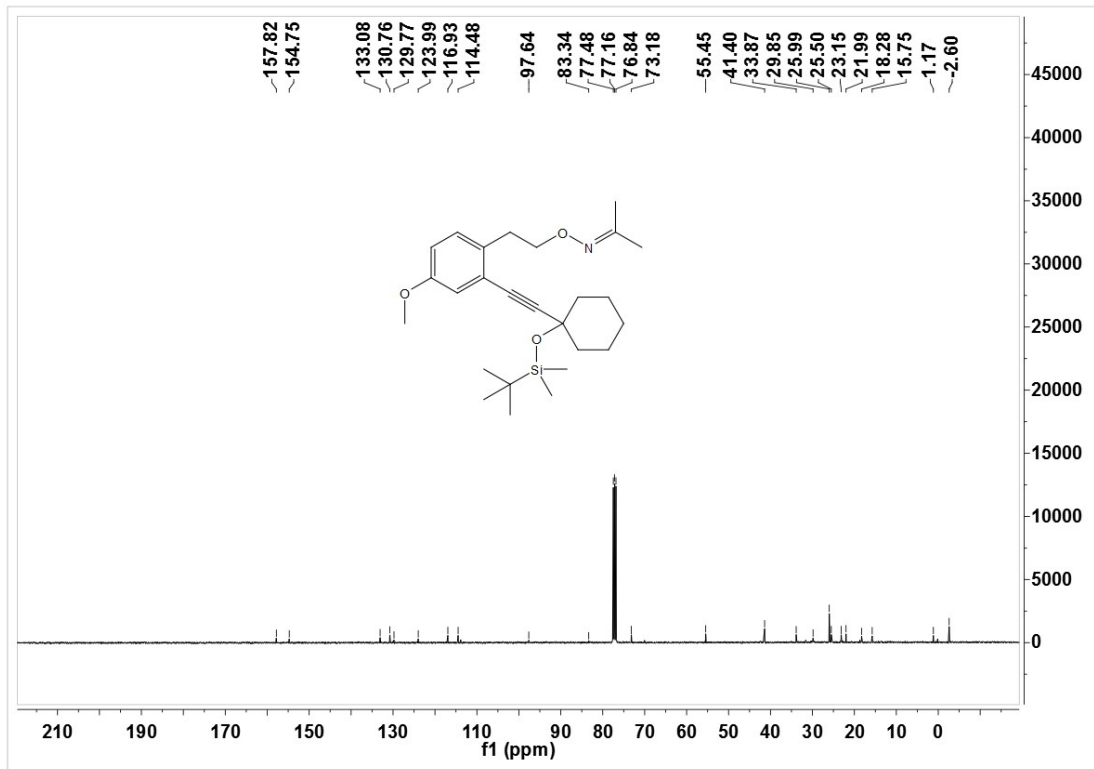

Cyclohexanone *O*-(2-(6-methoxy-3-((triisopropylsilyl)ethynyl) naphthalen-2-yl) propyl) oxime (3k)

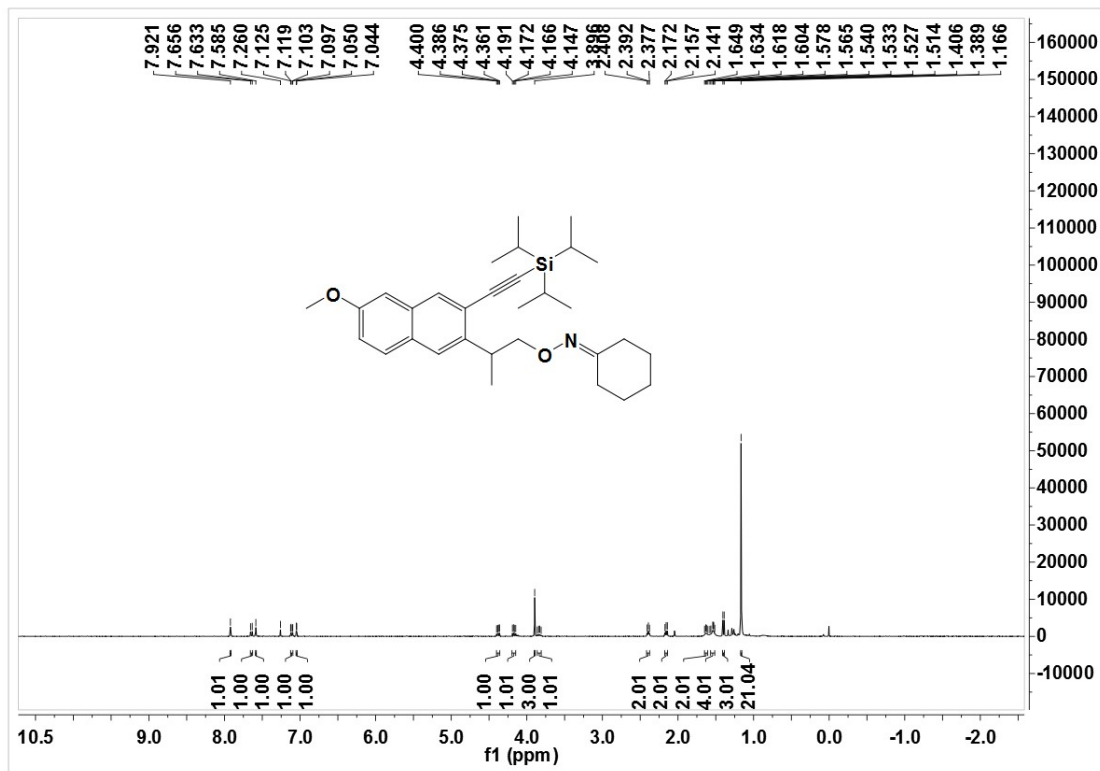

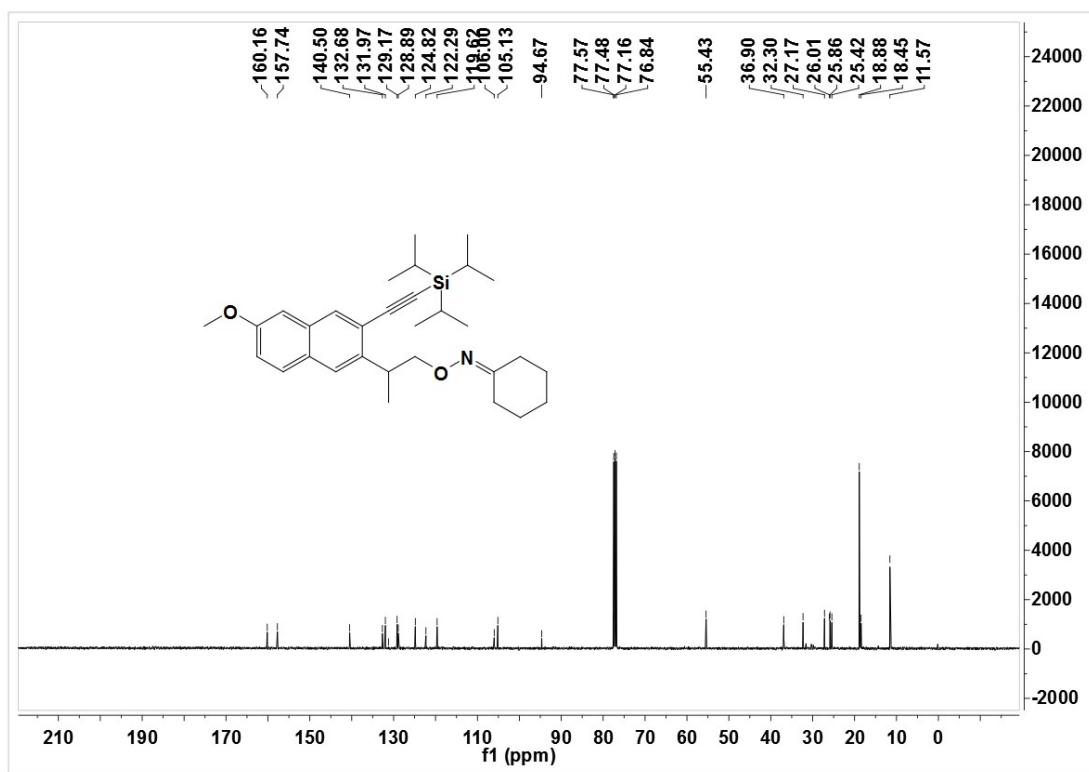

**3-(((8*R*,9*S*,13*S*,14*S*,17*S*)-3,17-Bis((tert-butyl dimethylsilyl)oxy)-13-methyl-7,8,9,11,12,13,14,15,16,17-decahydro-6*H*-cyclopenta[*a*]phenanthren-17-yl)ethynyl)-4-(((cyclohexylideneamino)oxy)methyl)-*N,N*-dipropylbenzenesulfonamide (5n)**

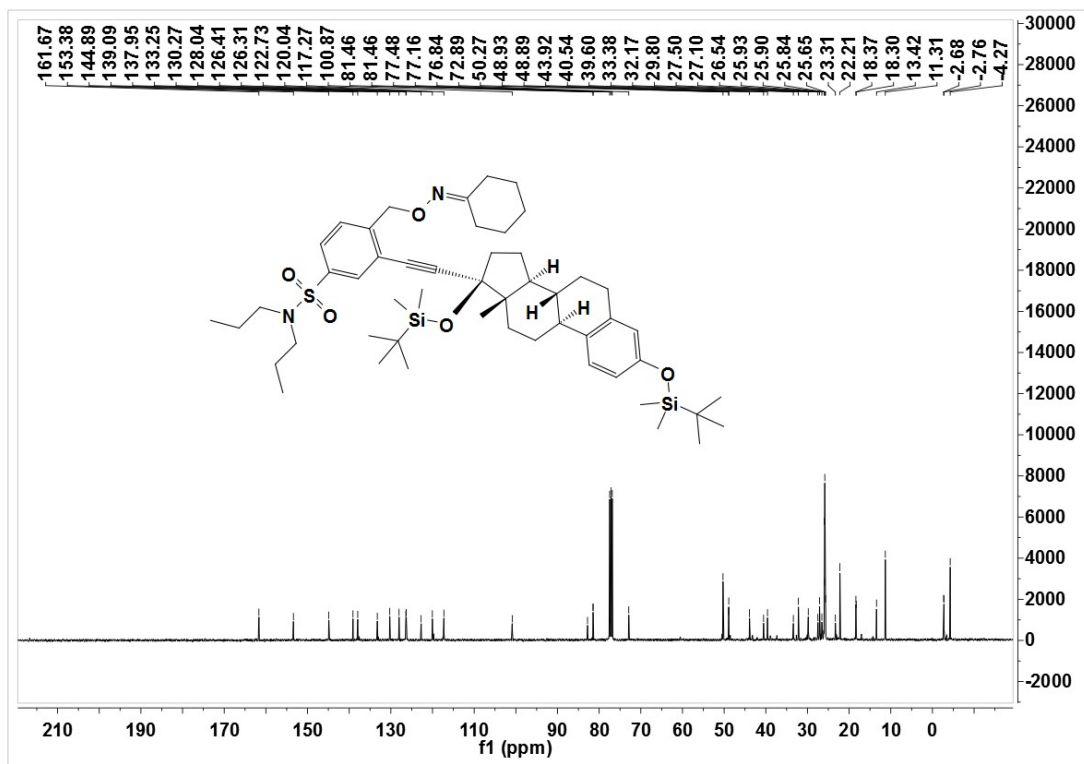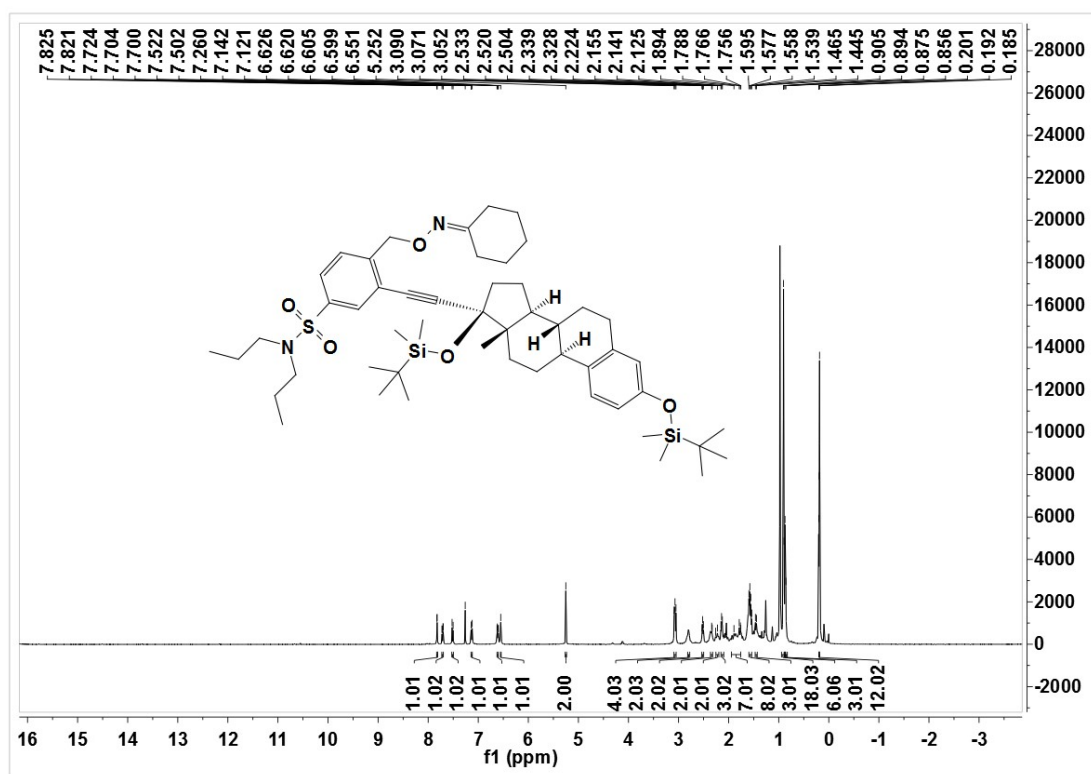

**Cyclohexanone *O*-(1-(2,6-bis((triisopropylsilyl)ethynyl)phenyl)propan-2-yl)oxime (31)**



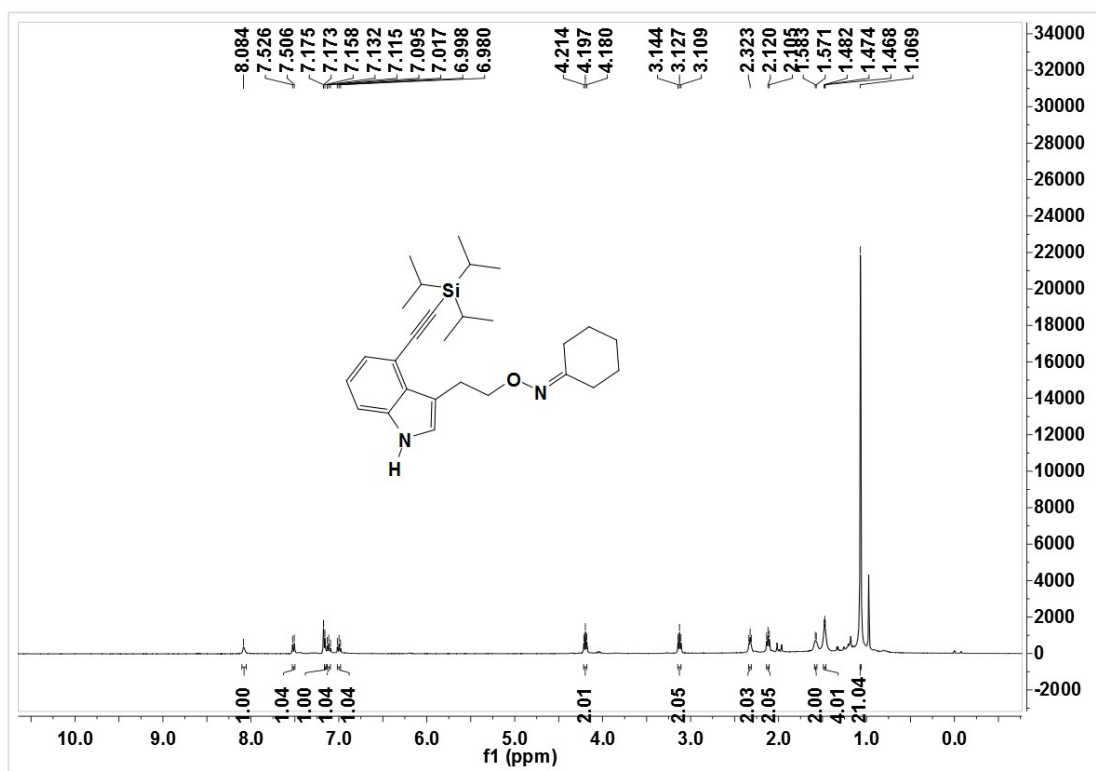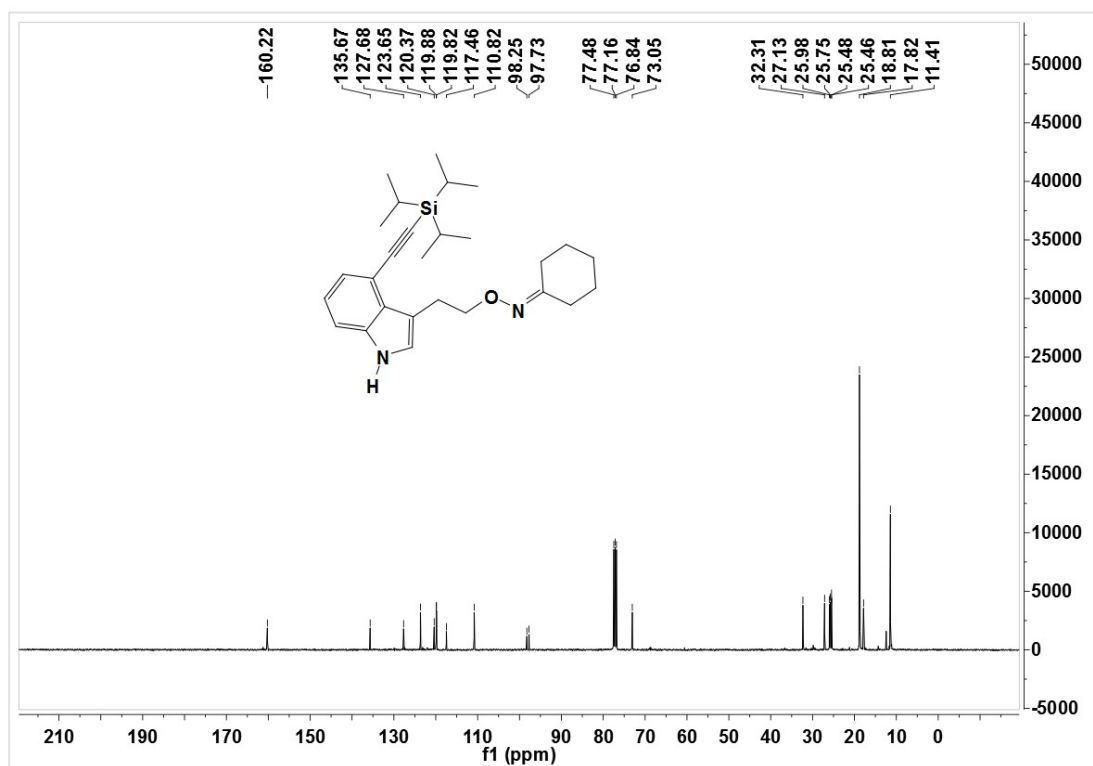

**Cyclohexanone *O*-(2-(4-((triisopropylsilyl)ethynyl)-1H-indol-3-yl)ethyl) oxime (3m)**

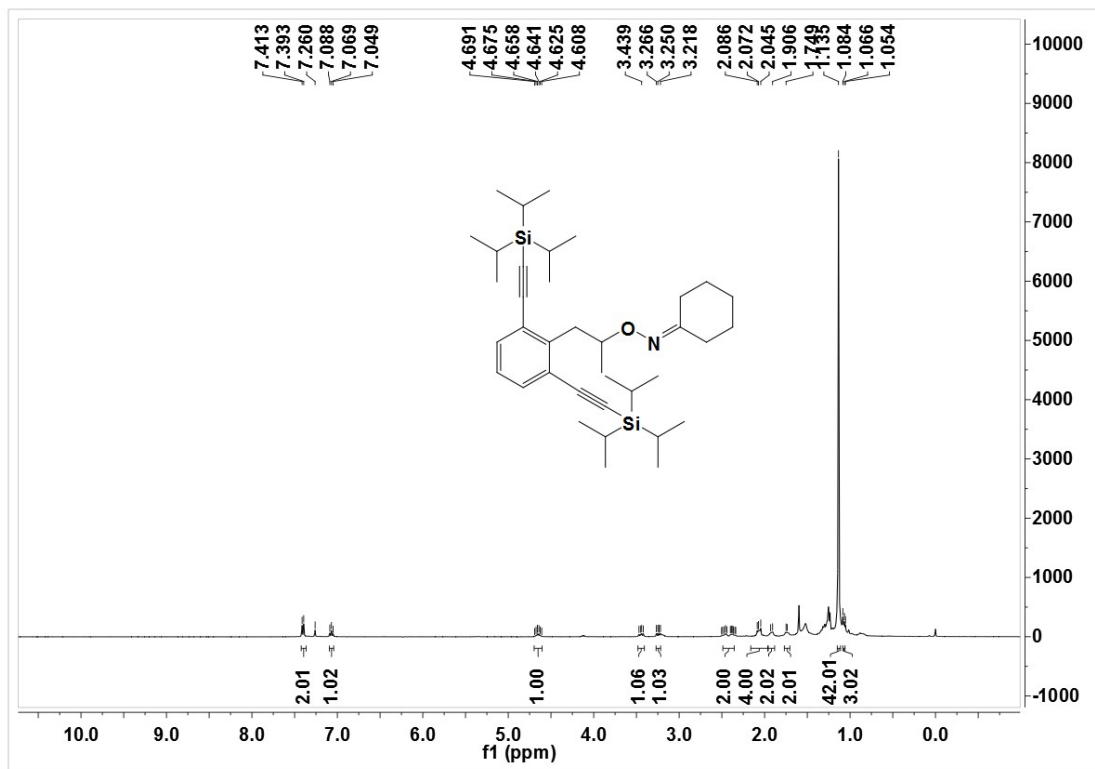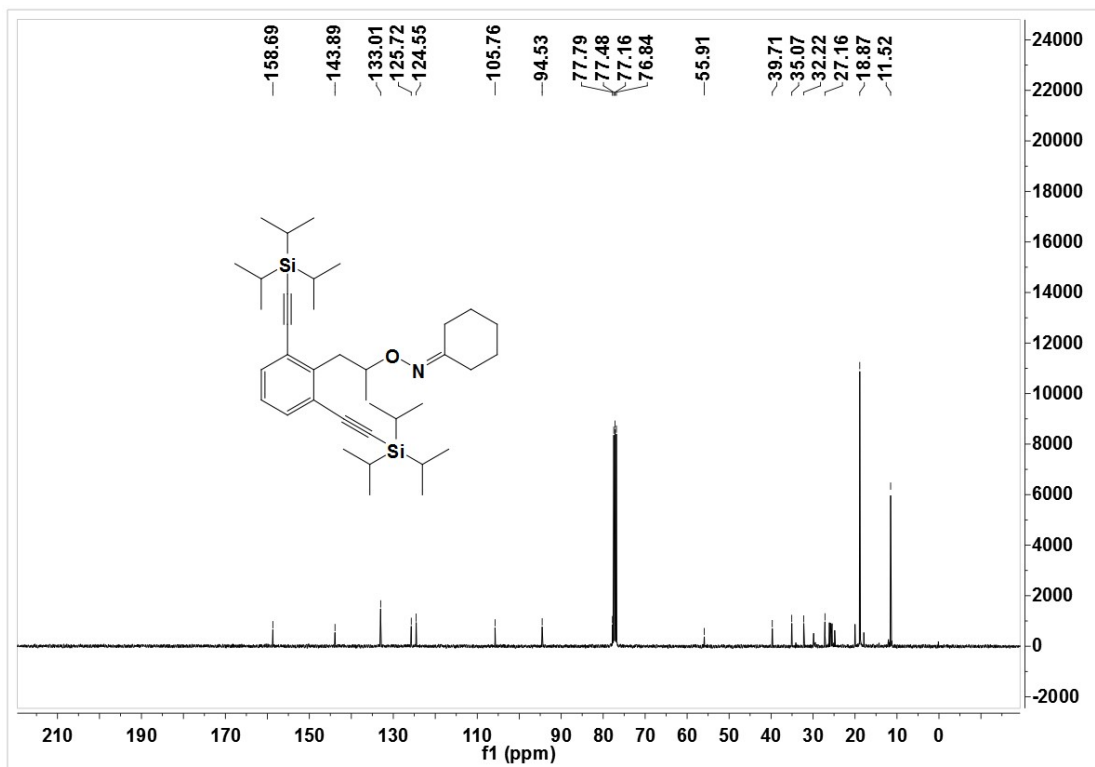

Cyclohexanone *O*-(1-phenyl-5-(triisopropylsilyl)pent-4-yn-2-yl) oxime (3m')

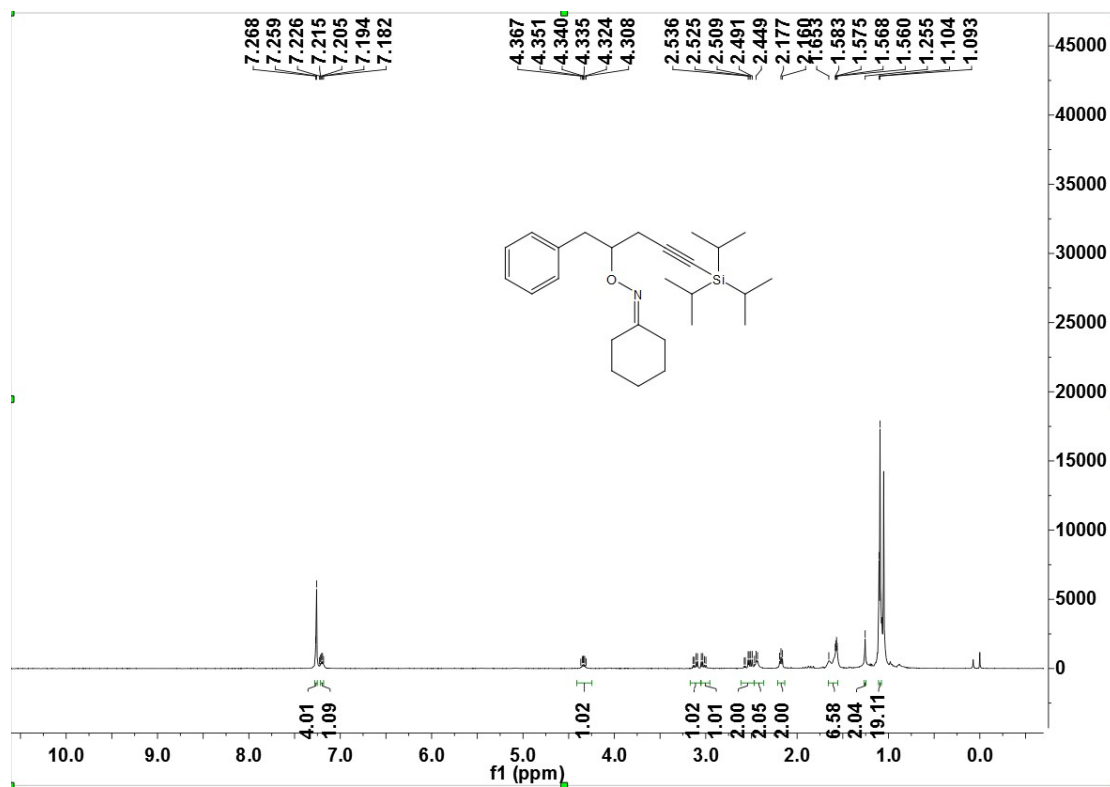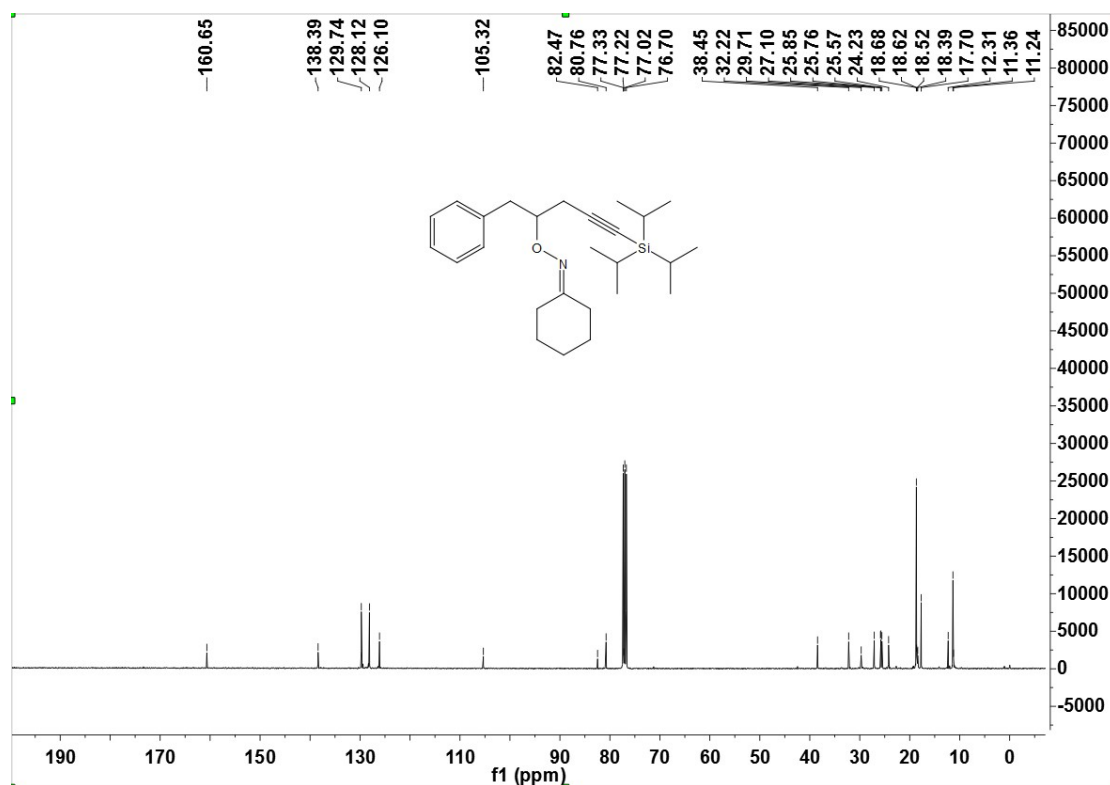

2-(2-((Triisopropylsilyl)ethynyl)phenyl)ethan-1-ol (3a-1)

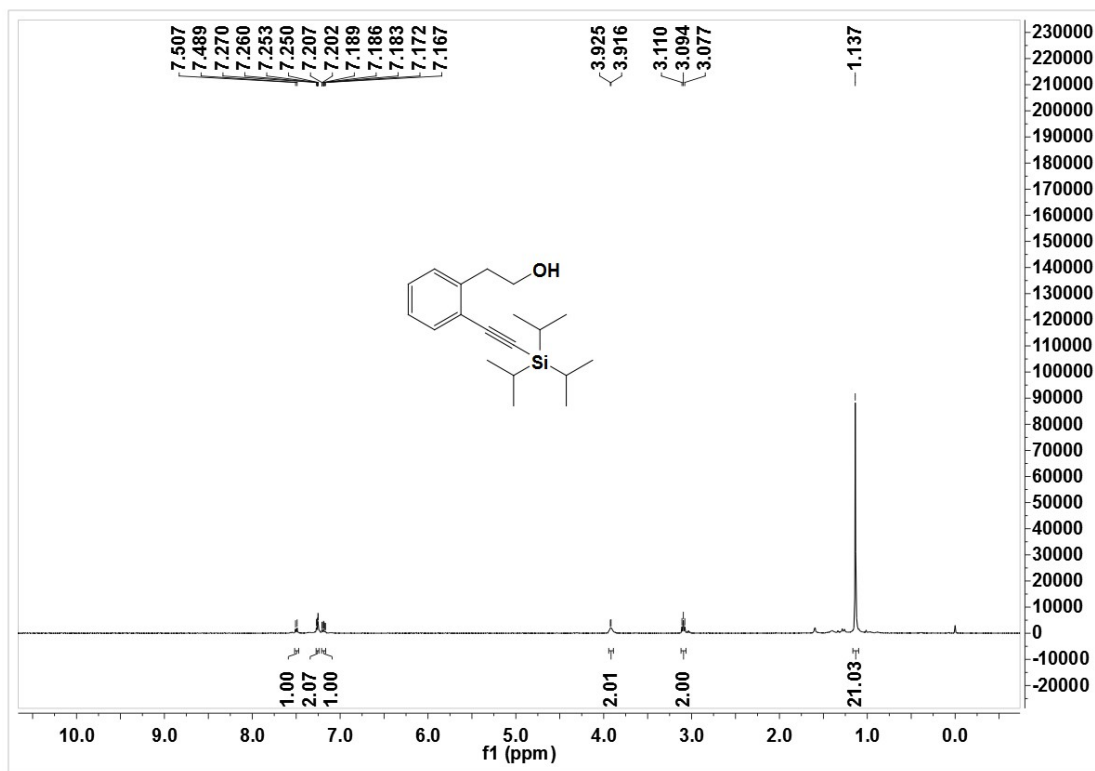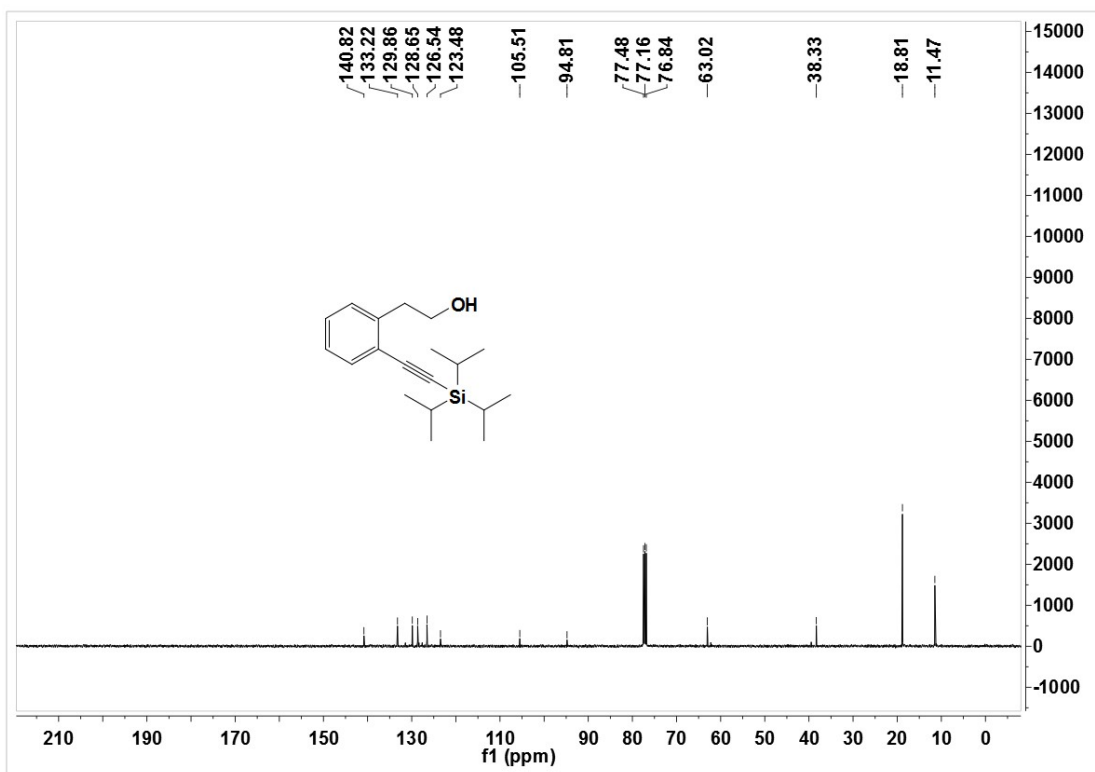

**2-(2-Ethynylphenyl)ethan-1-ol (3a-2)**

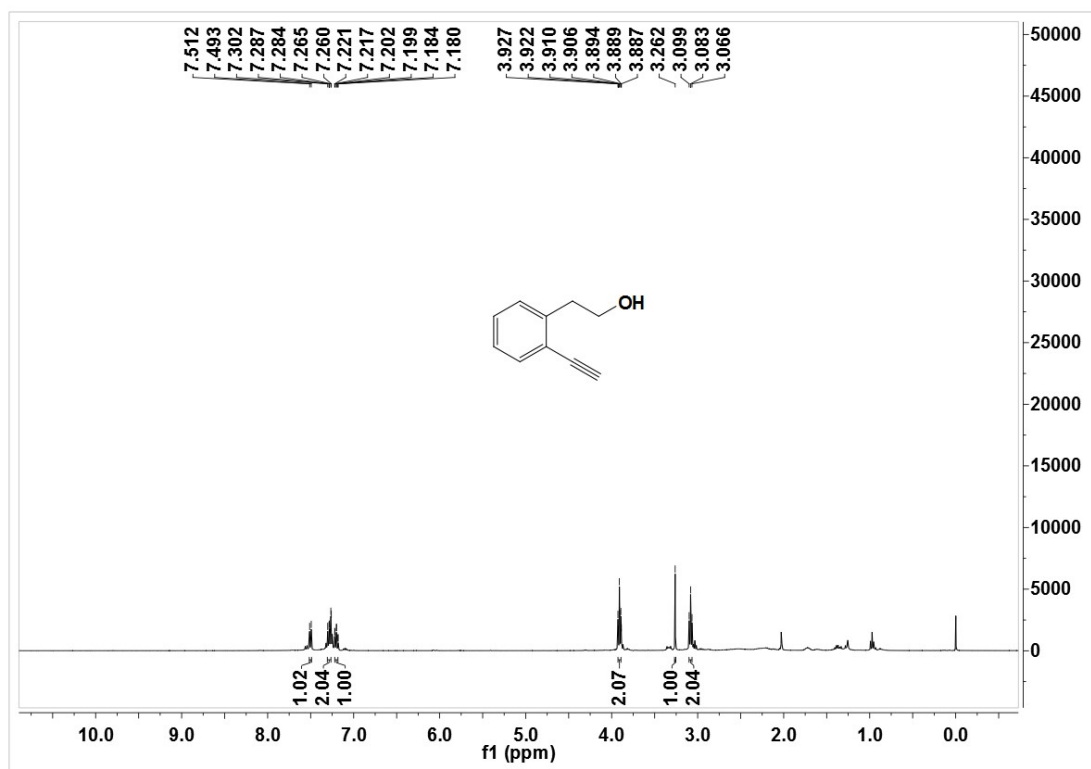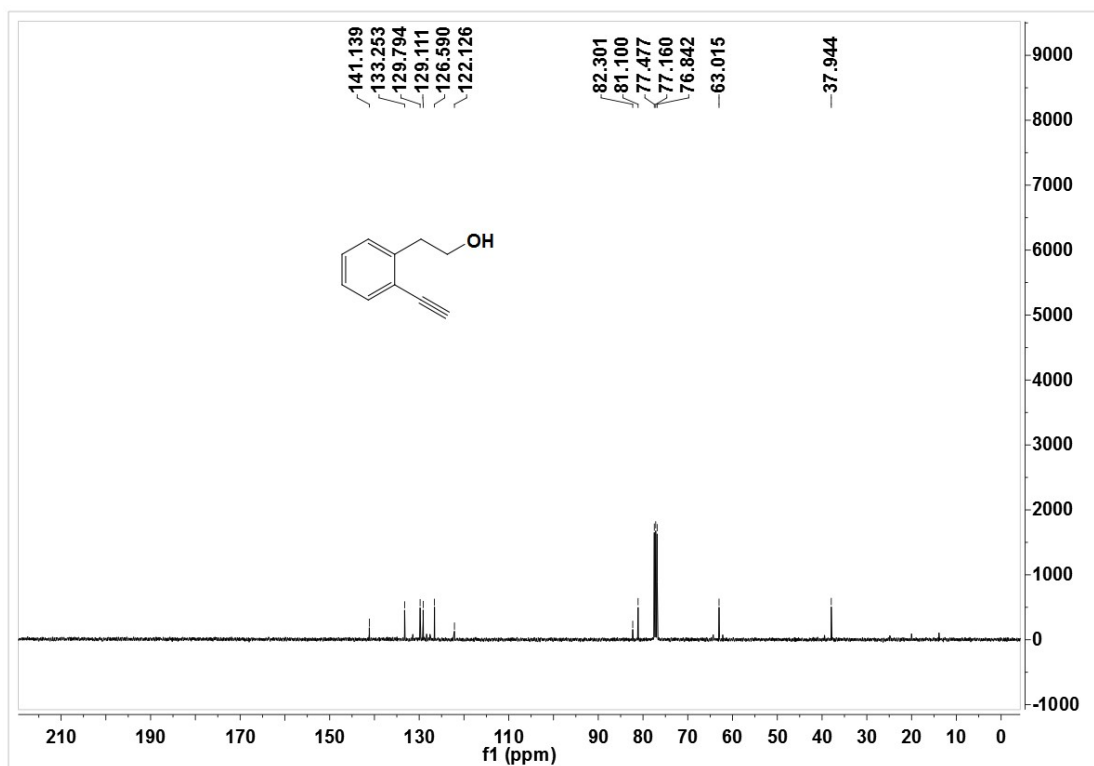

**Methyl 4-((2-(2-hydroxyethyl)phenyl)ethynyl)benzoate (3a-3)**

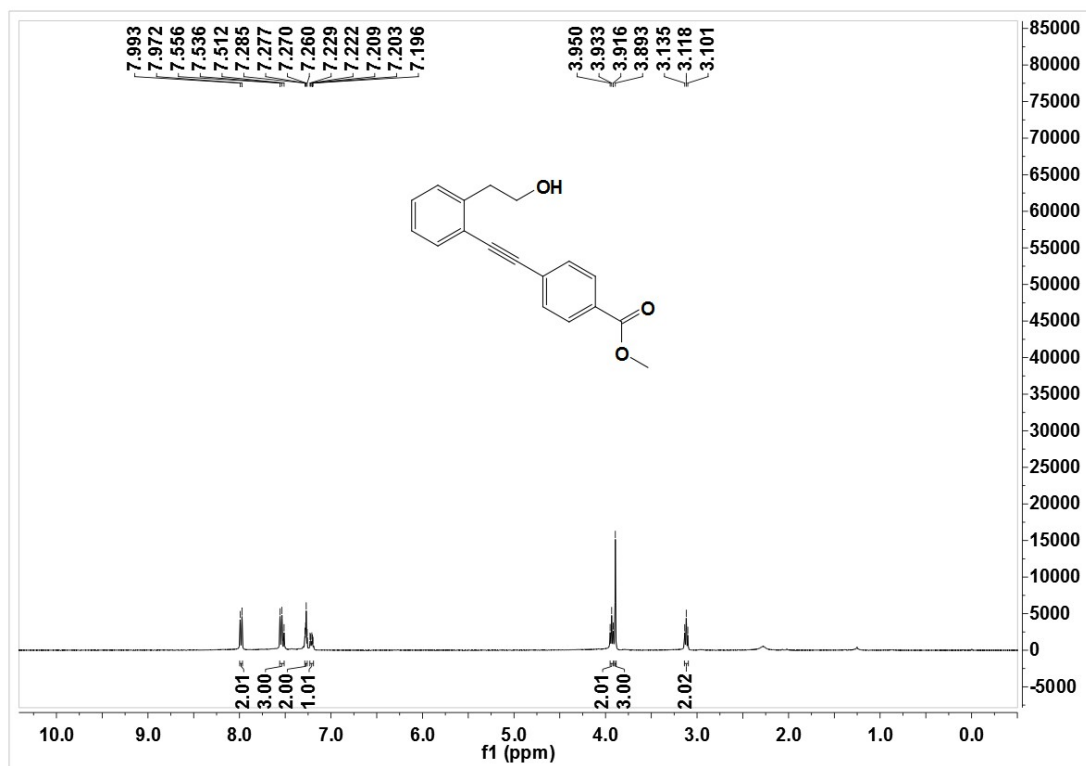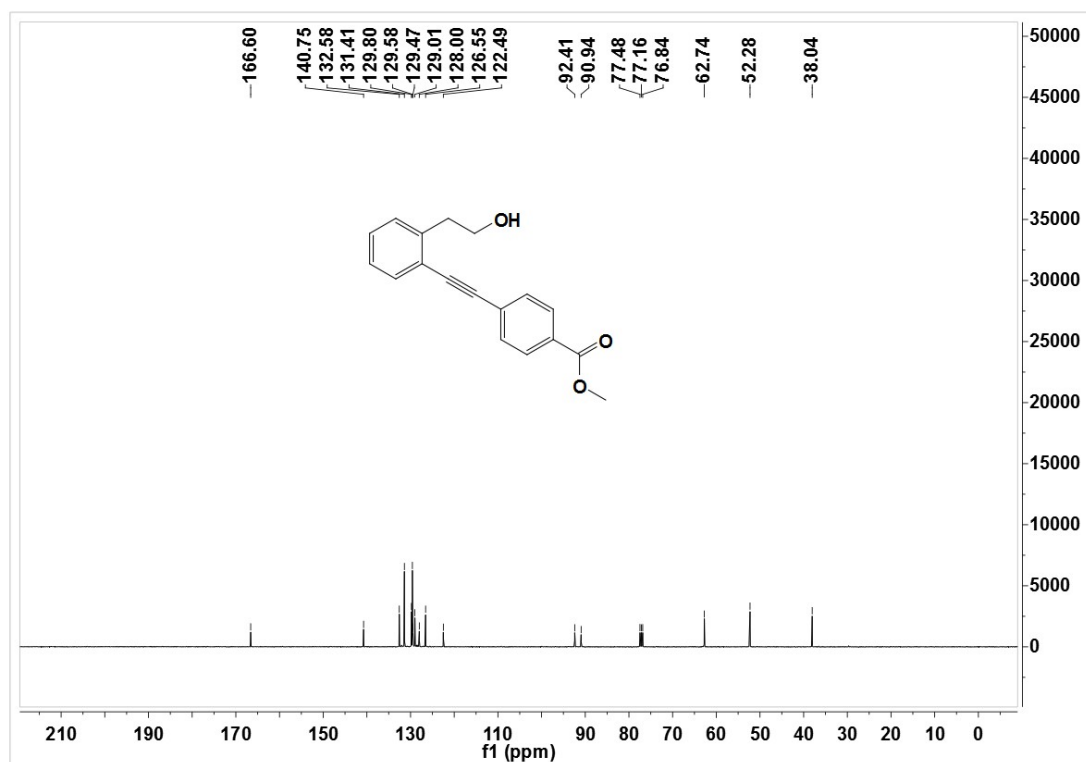

**Methyl 4-(4,5-dihydrobenzo[d]oxepin-2-yl)benzoate (3a-4)**

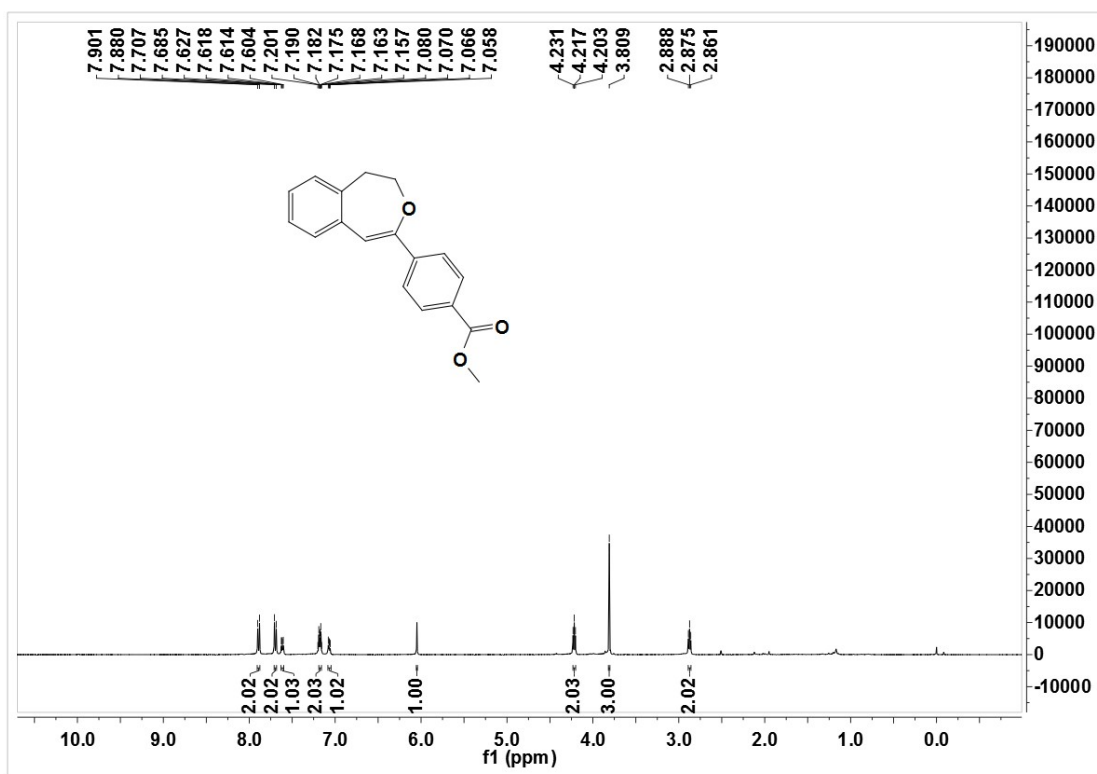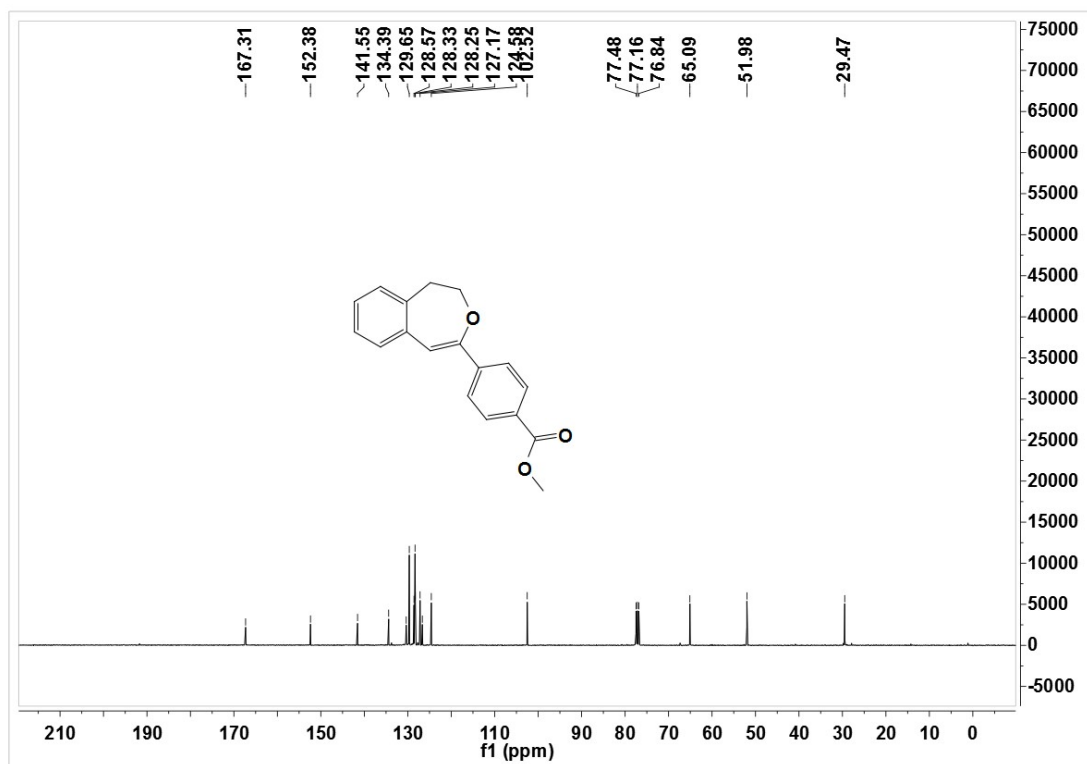

Propan-2-one *O*-(2-((triisopropylsilyl)ethynyl)benzyl) oxime (5a)

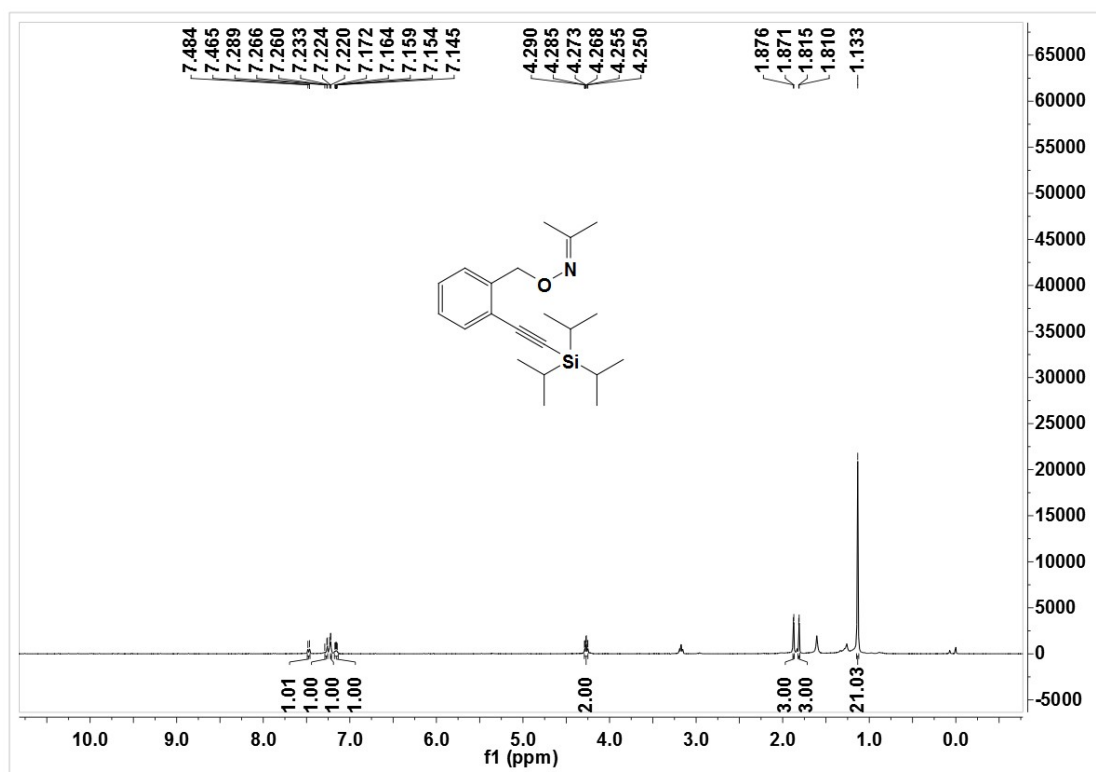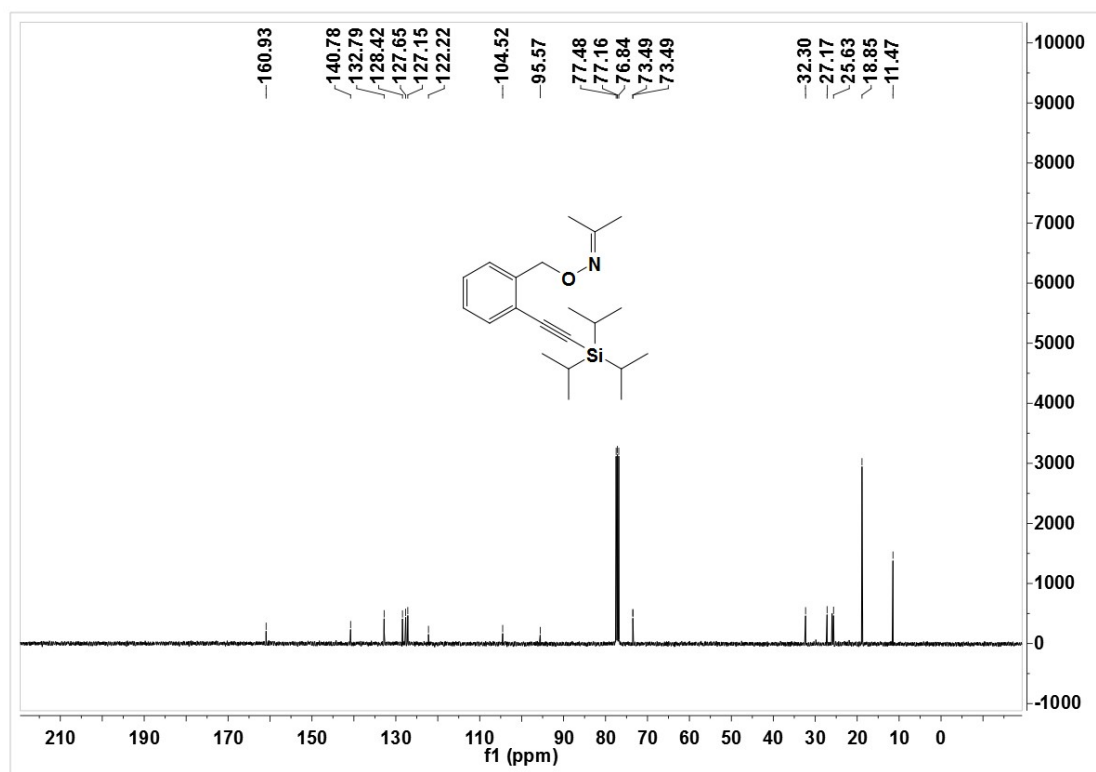

**Propan-2-one *O*-(4-methoxy-2-((triisopropylsilyl)ethynyl)benzyl) oxime (5b)**



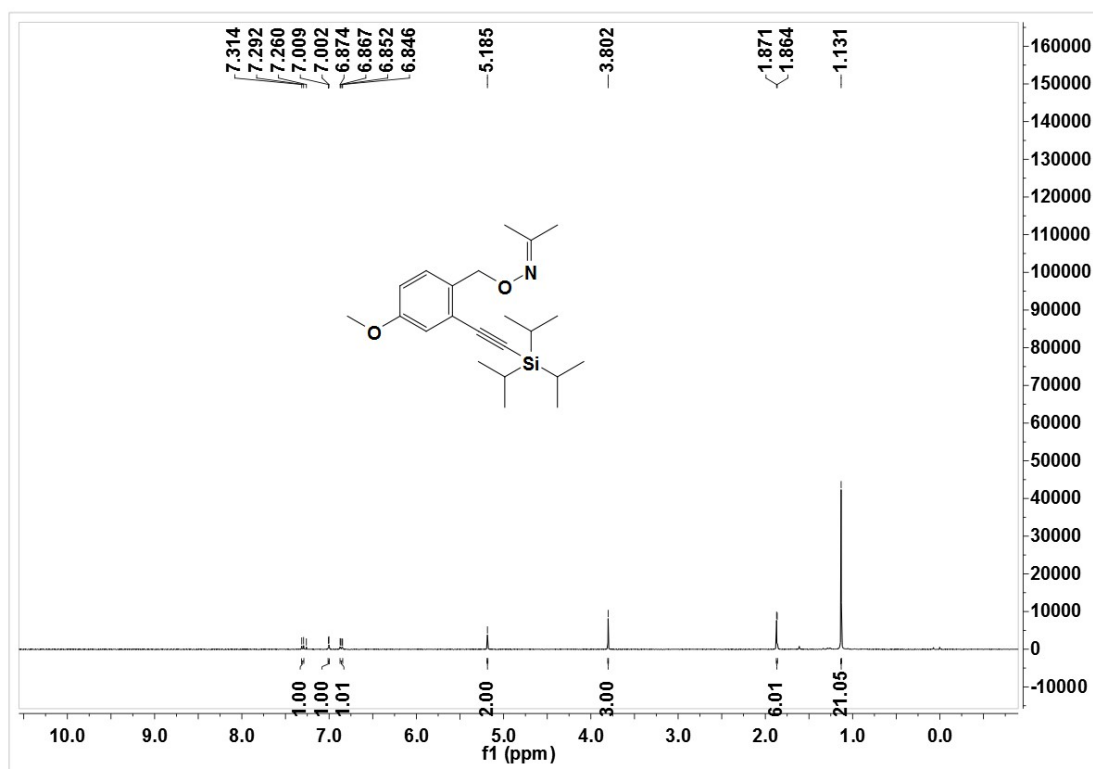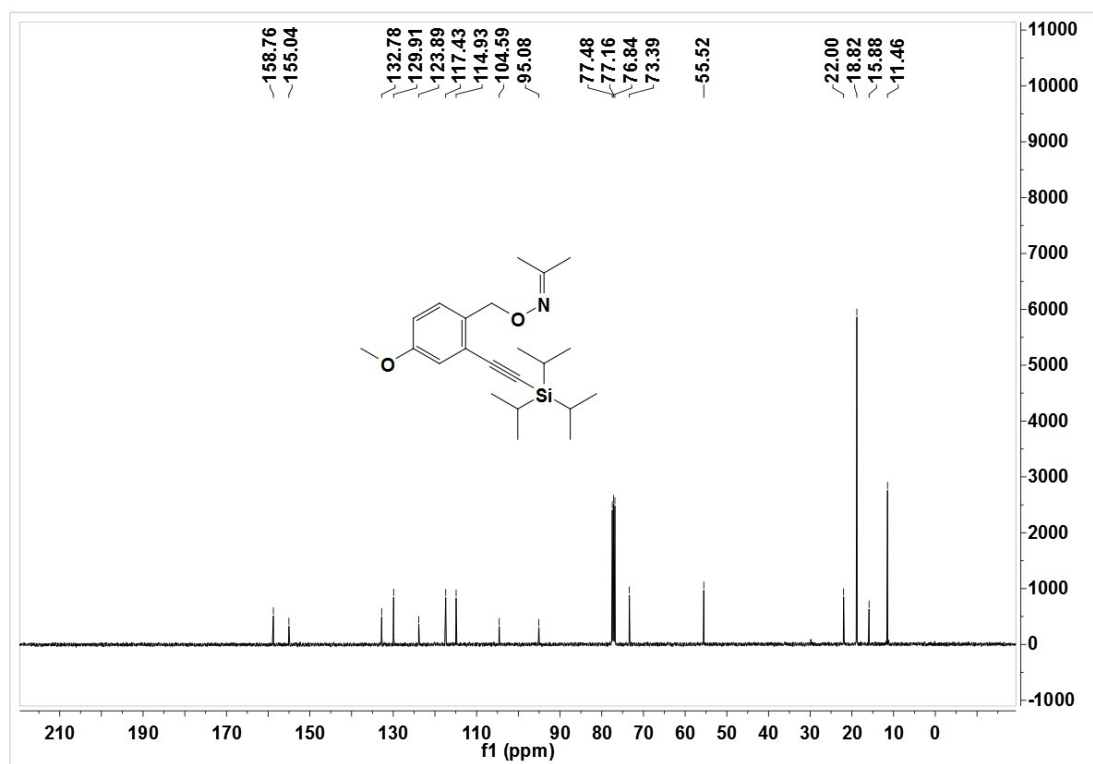

**Propan-2-one *O*-(4-bromo-2-((triisopropylsilyl)ethynyl)benzyl) oxime (5c)**

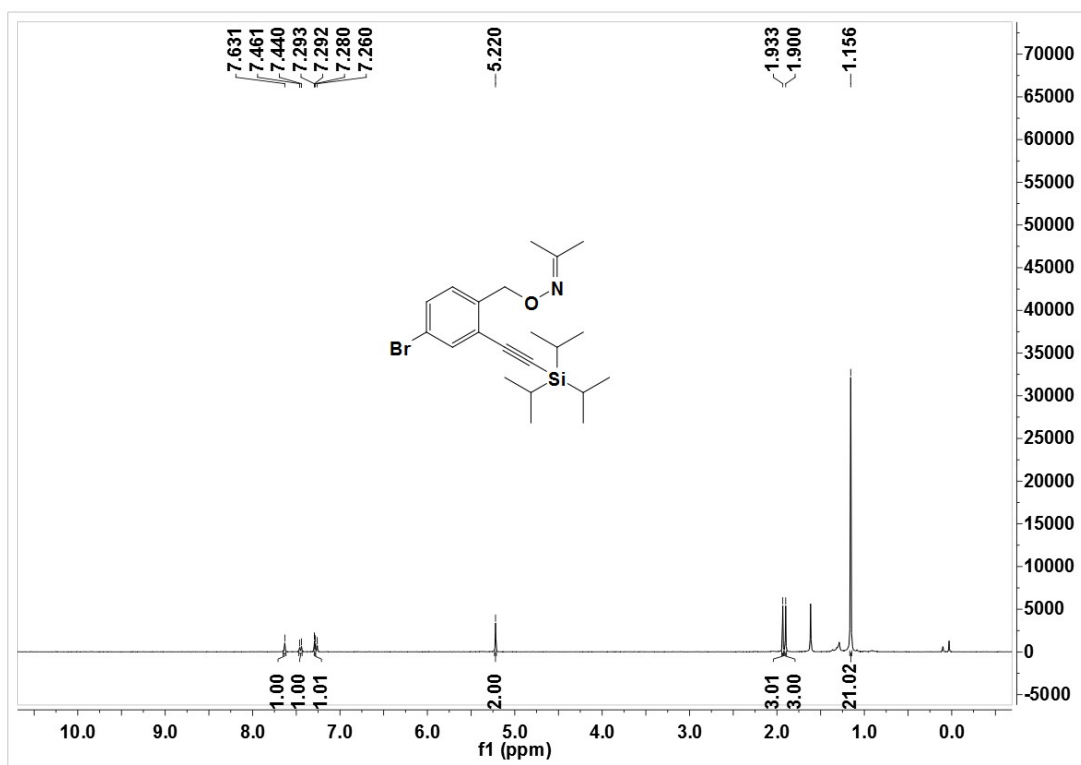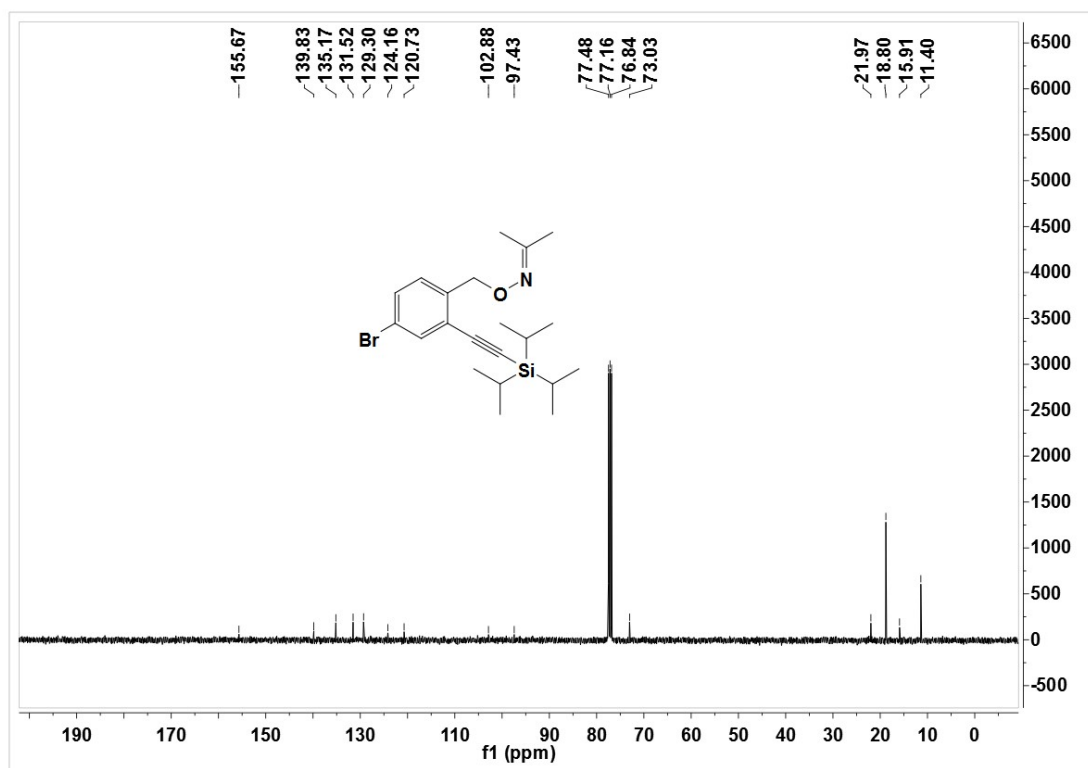

**Propan-2-one-*O*-(4-bromo-2-((triisopropylsilyl)ethynyl)benzyl) oxime (5d)**

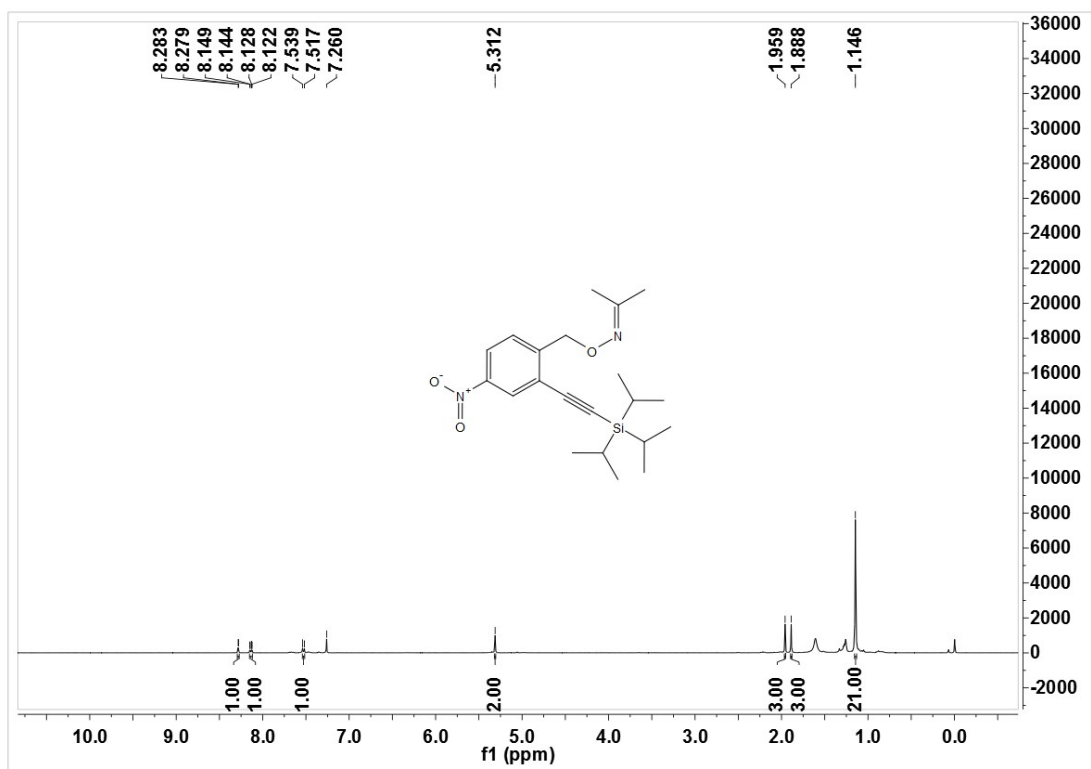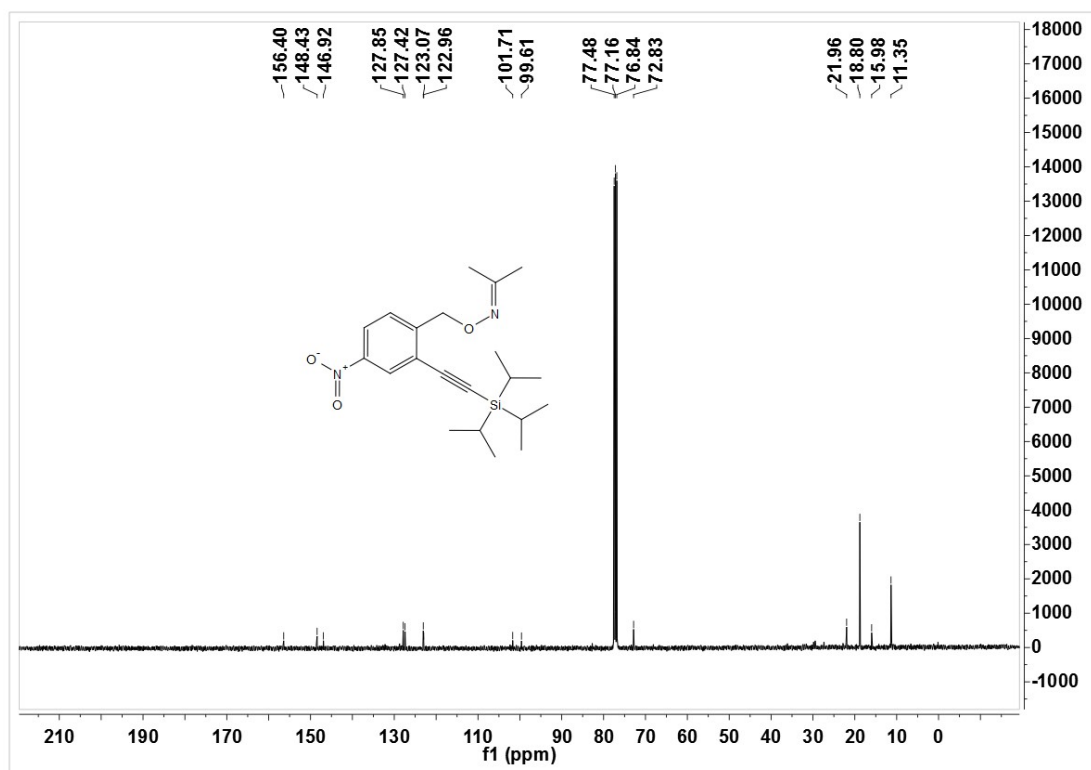

**Cyclohexanone *O*-(4-fluoro-2-((triisopropylsilyl)ethynyl)benzyl) oxime (5e)**

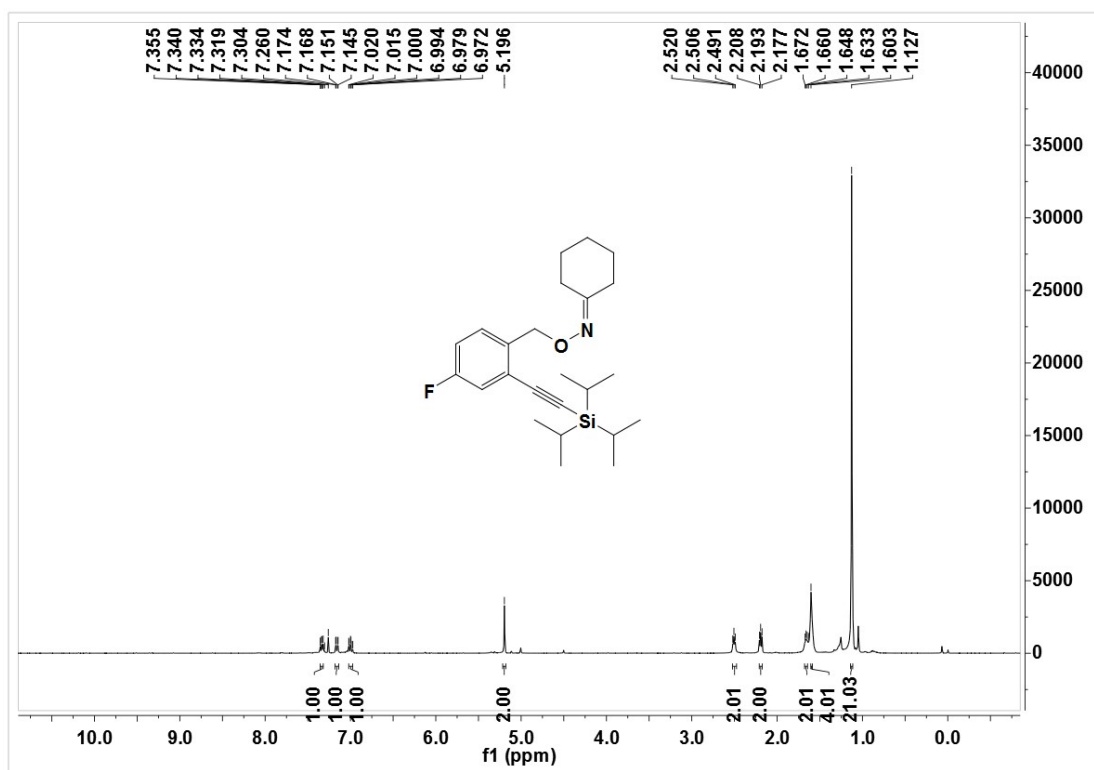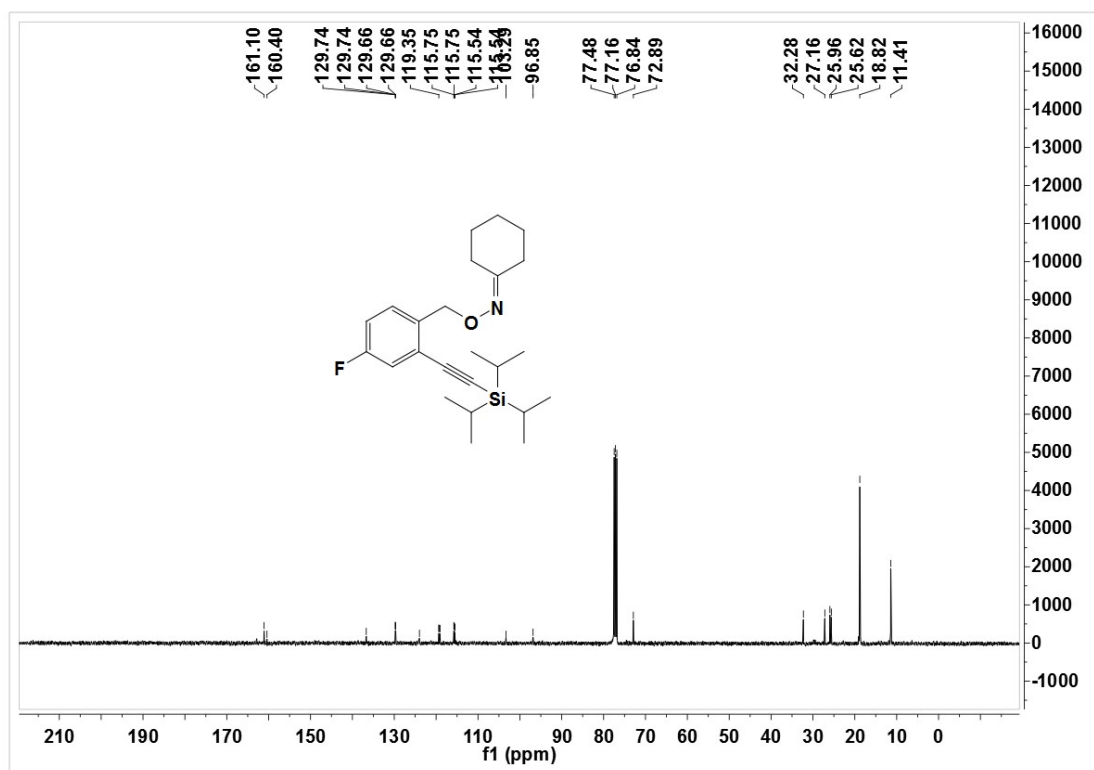

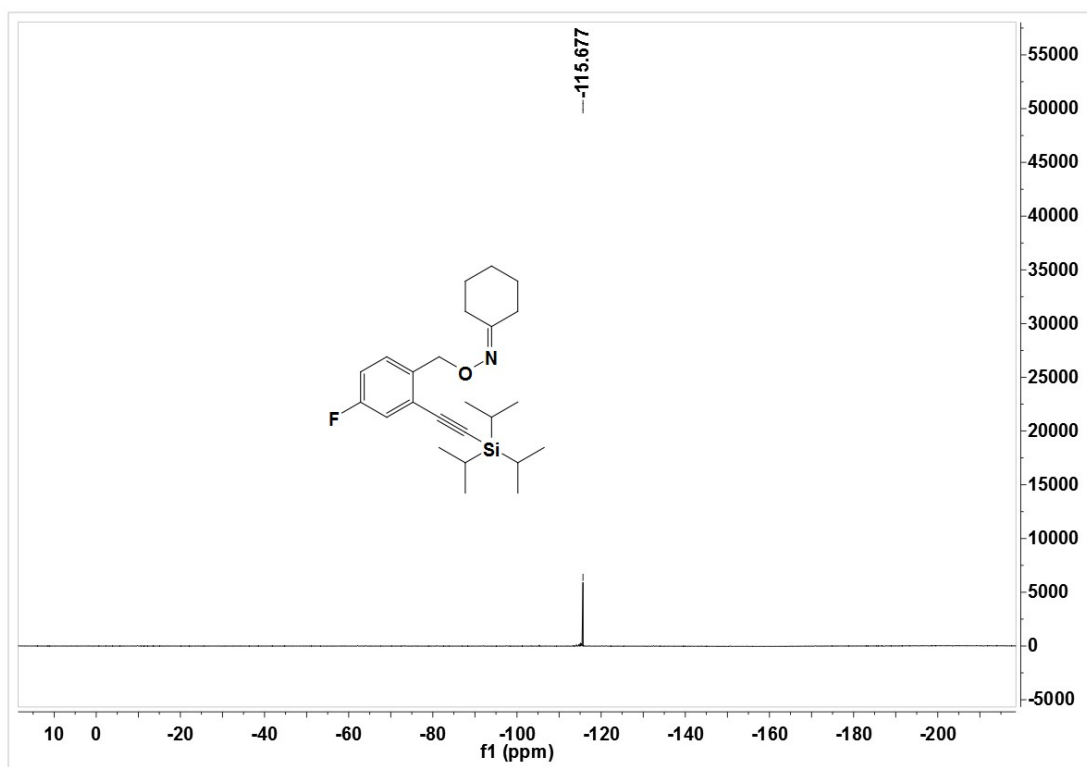

Cyclohexanone *O*-(4-chloro-2-((triisopropylsilyl)ethynyl)benzyl) oxime (5f)

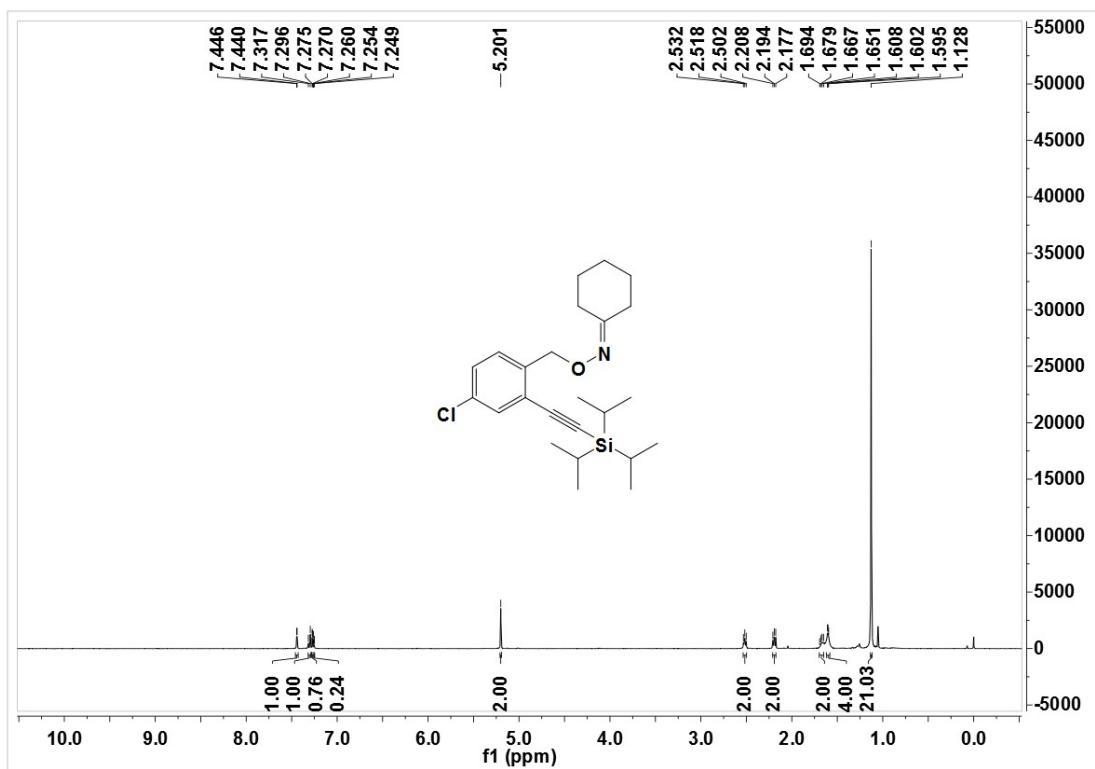

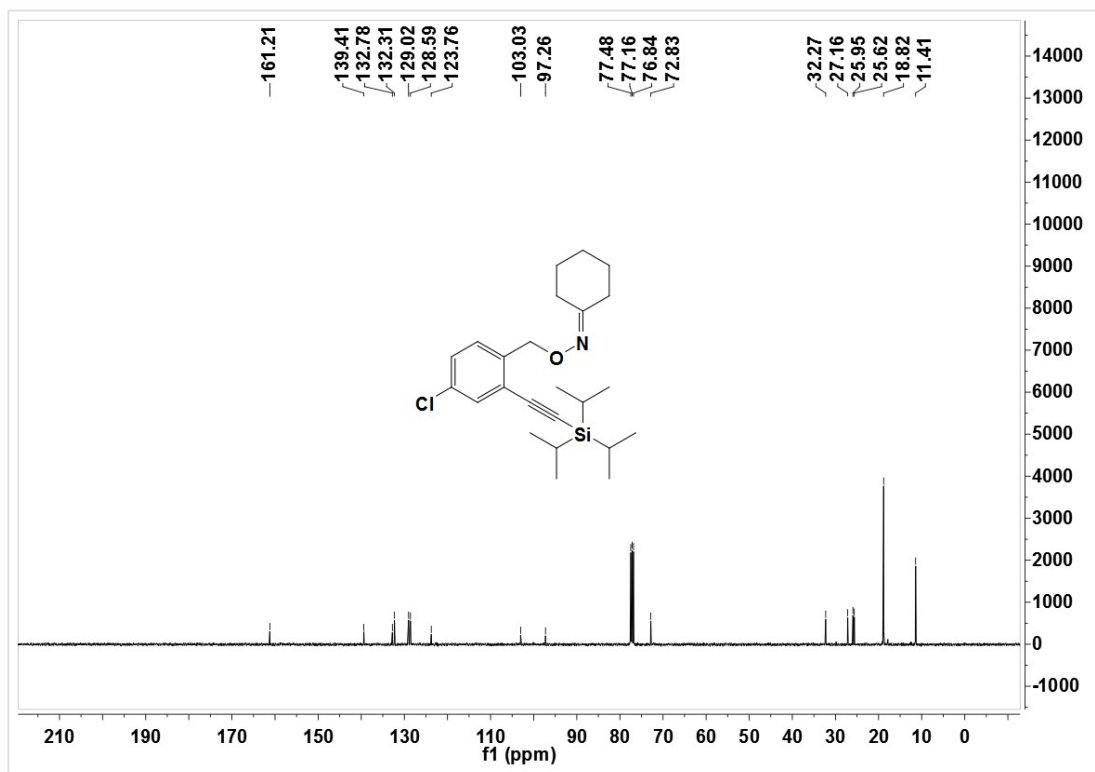

**Cyclohexanone *O*-(4-(trifluoromethyl)-2-((triisopropylsilyl)ethynyl)benzyl) oxime (5g)**

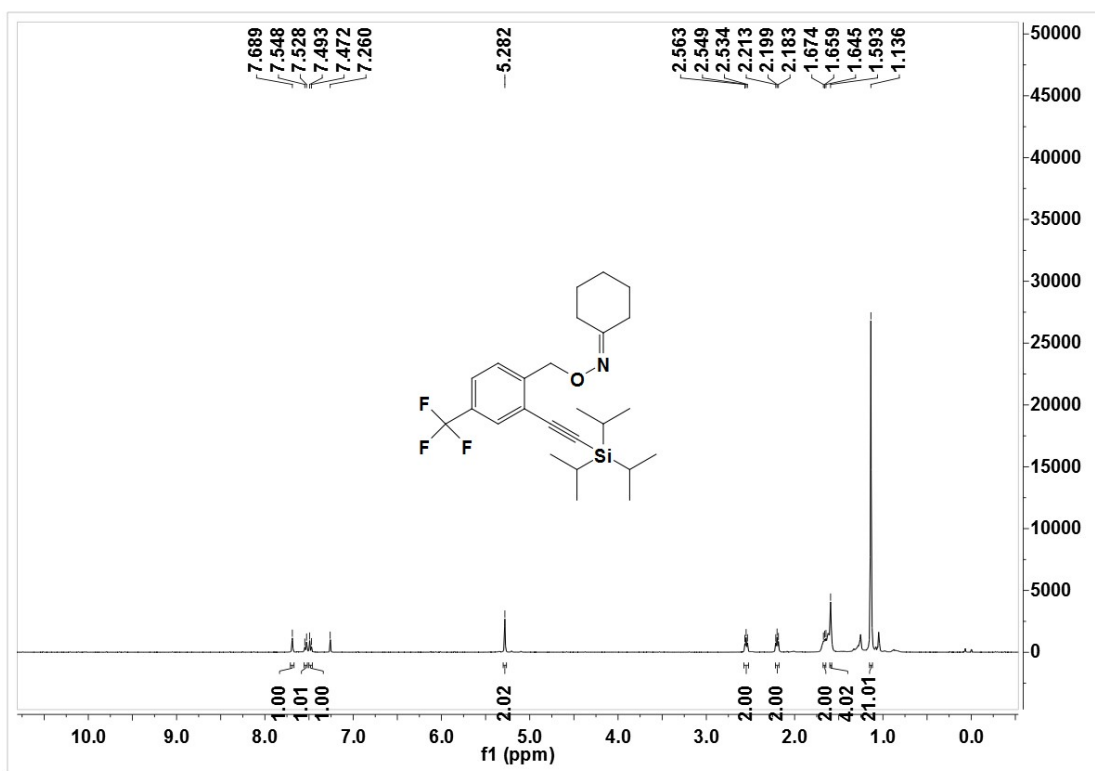

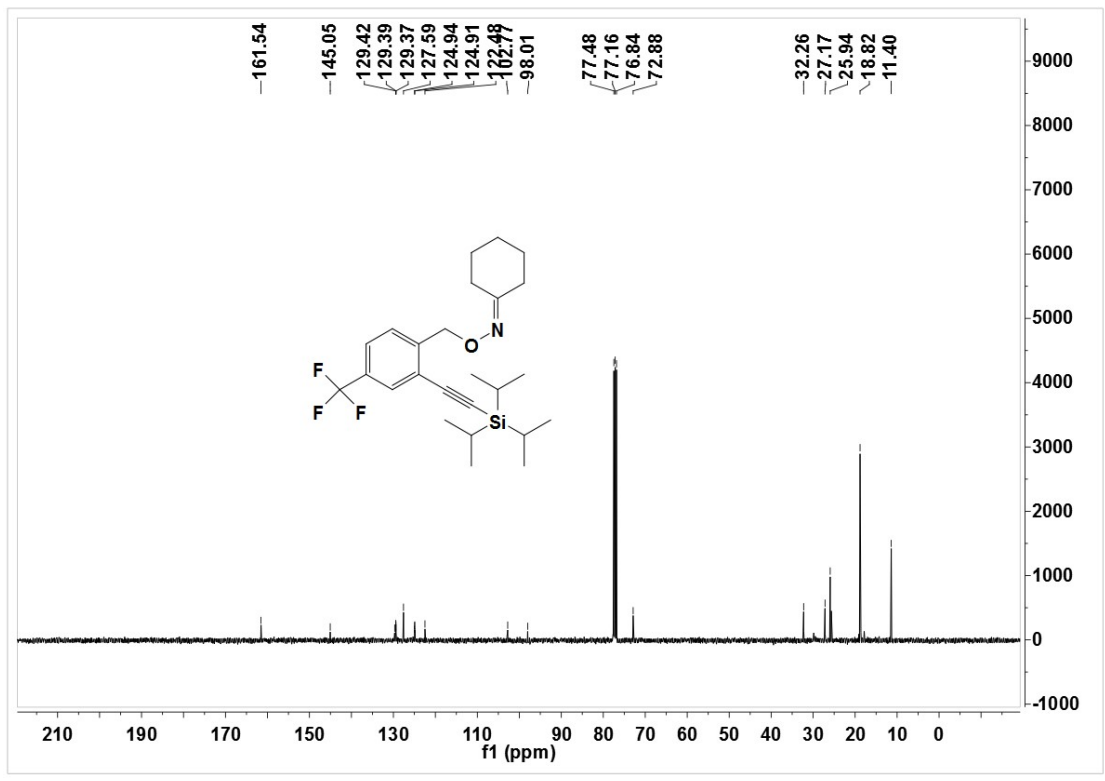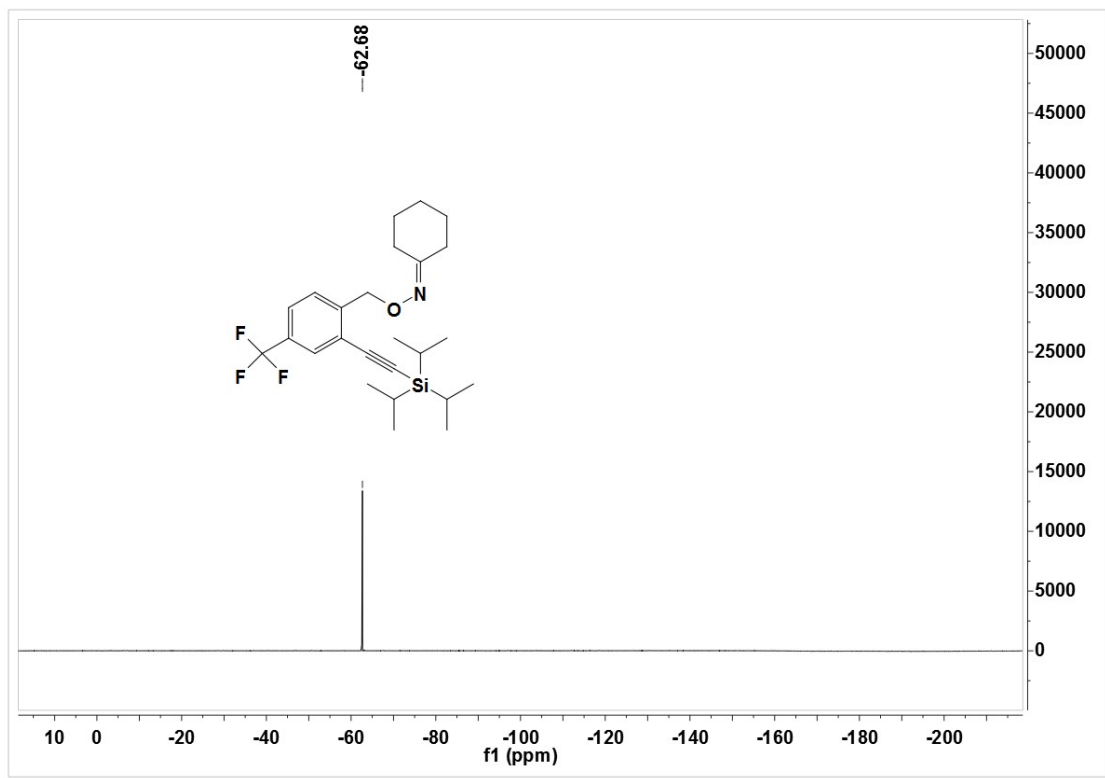

Cyclohexanone *O*-(5-methoxy-2-((triisopropylsilyl)ethynyl)benzyl) oxime (5h)

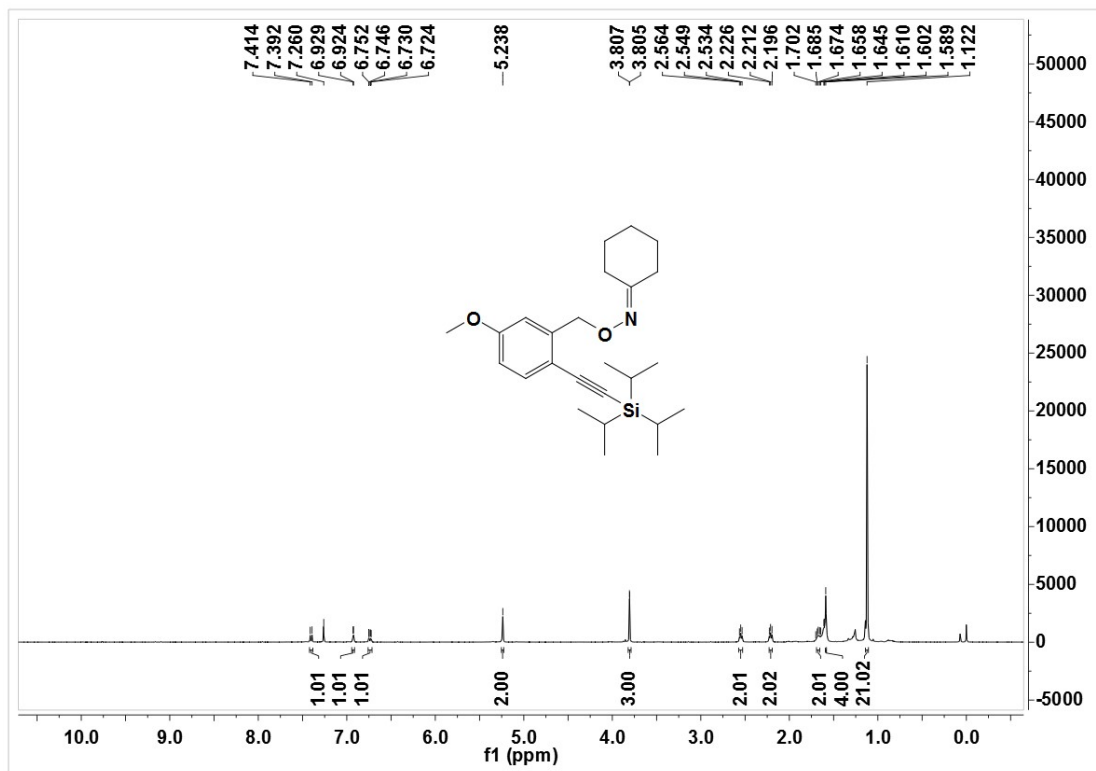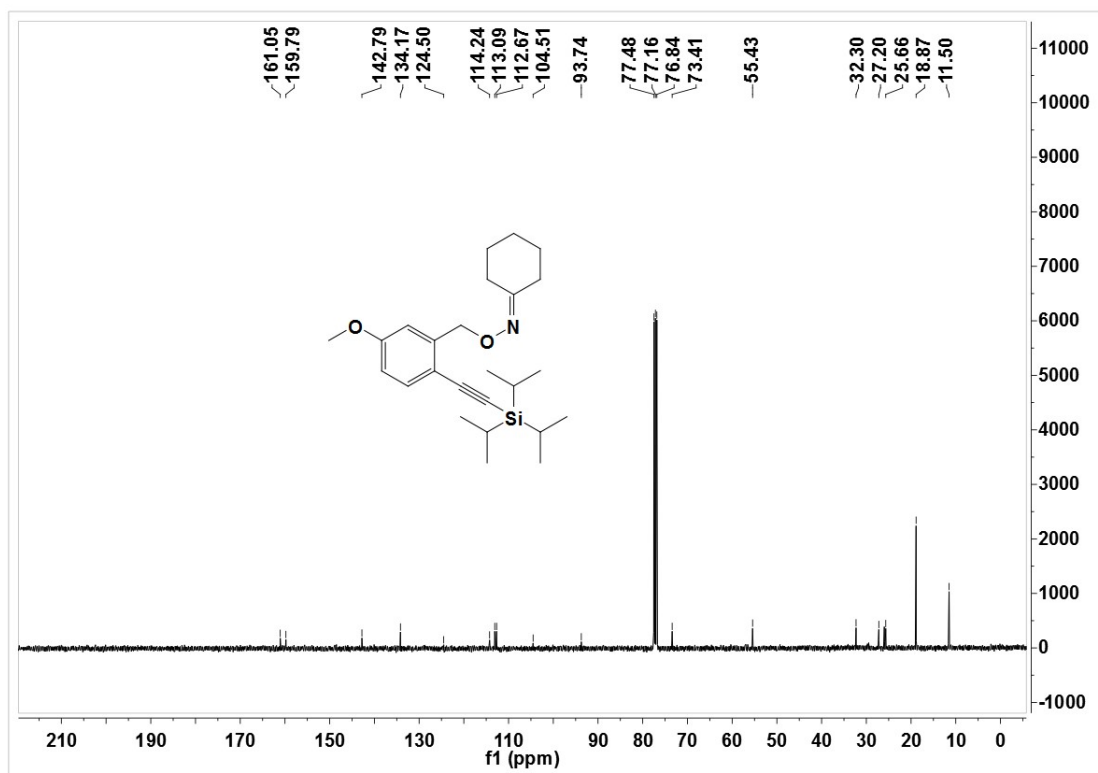



Cyclohexanone *O*-(2-chloro-6-((triisopropylsilyl)ethynyl)benzyl) oxime (5i)

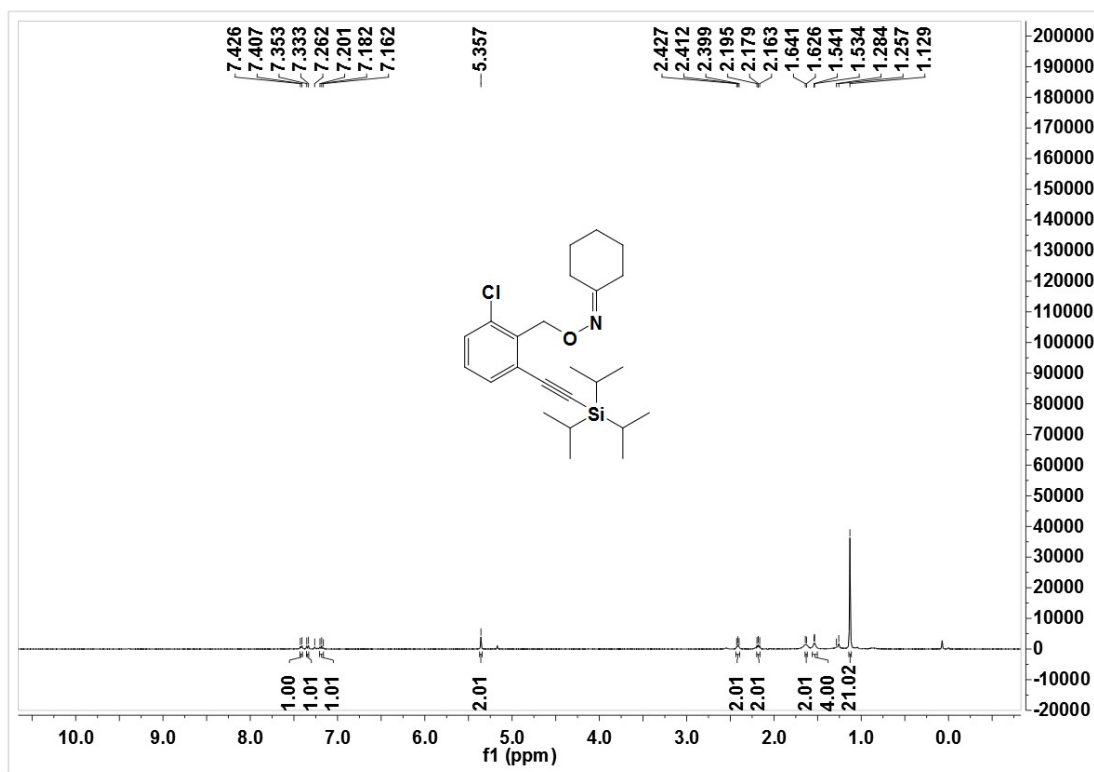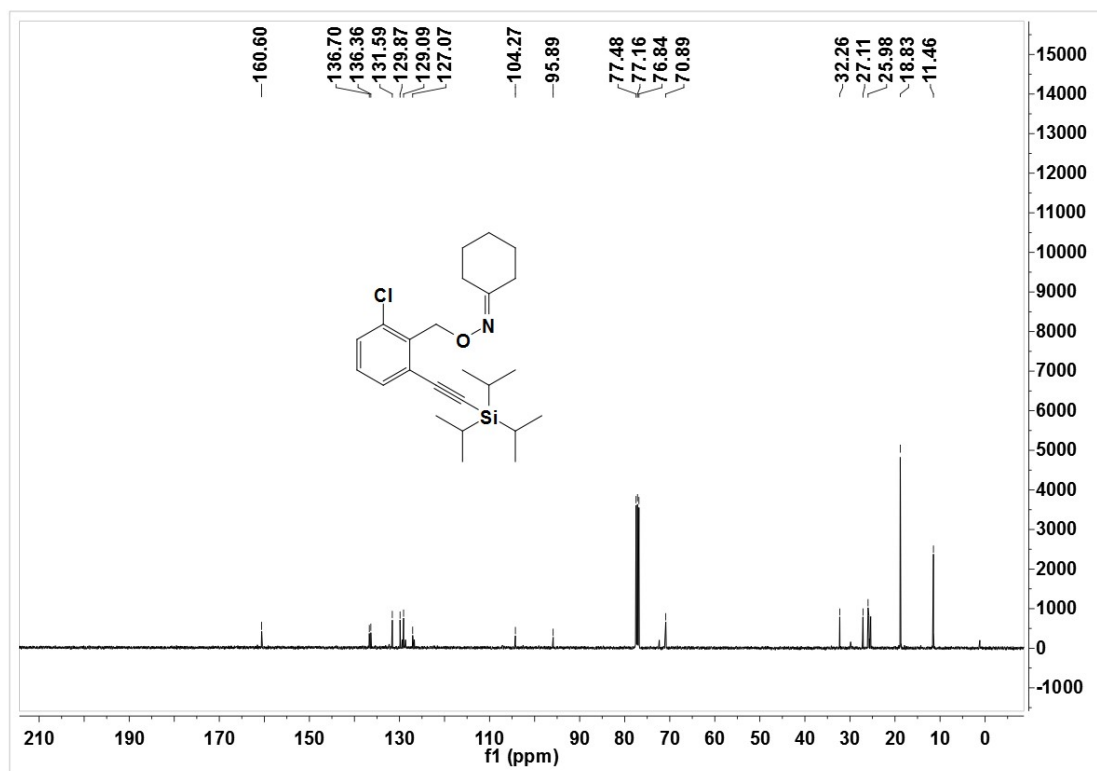

# Cyclohexanone *O*-((3-((triisopropylsilyl)ethynyl)thiophen-2-yl)methyl) oxime (5j)

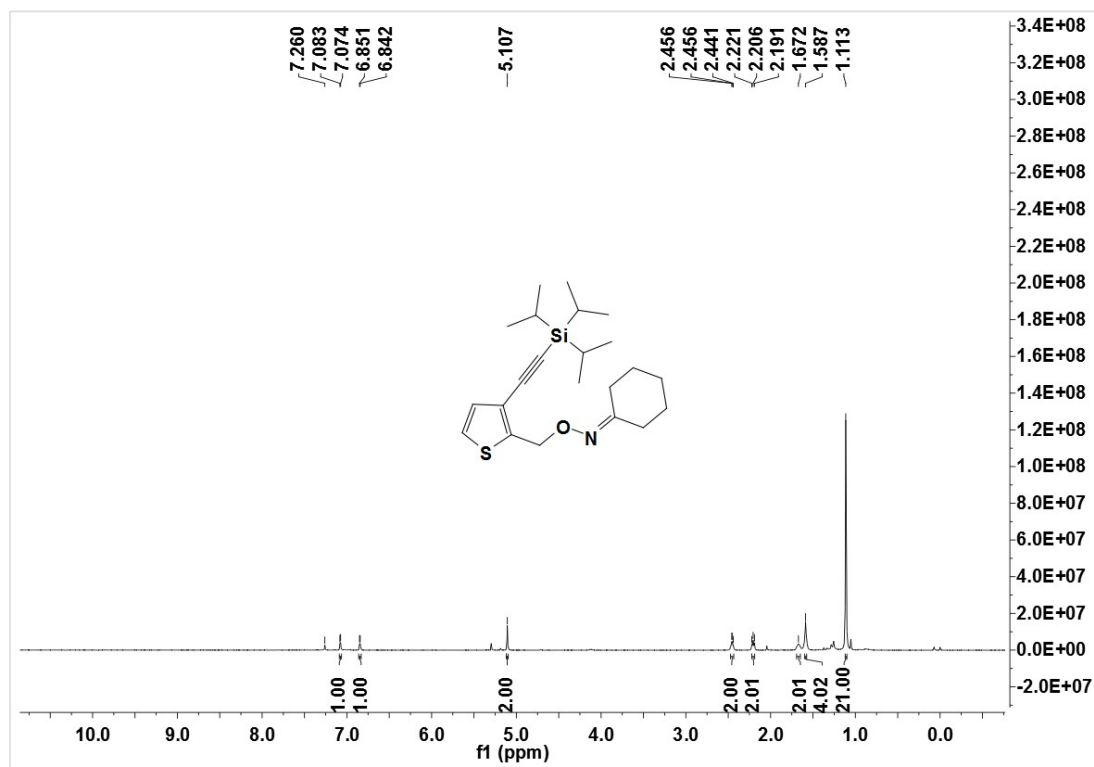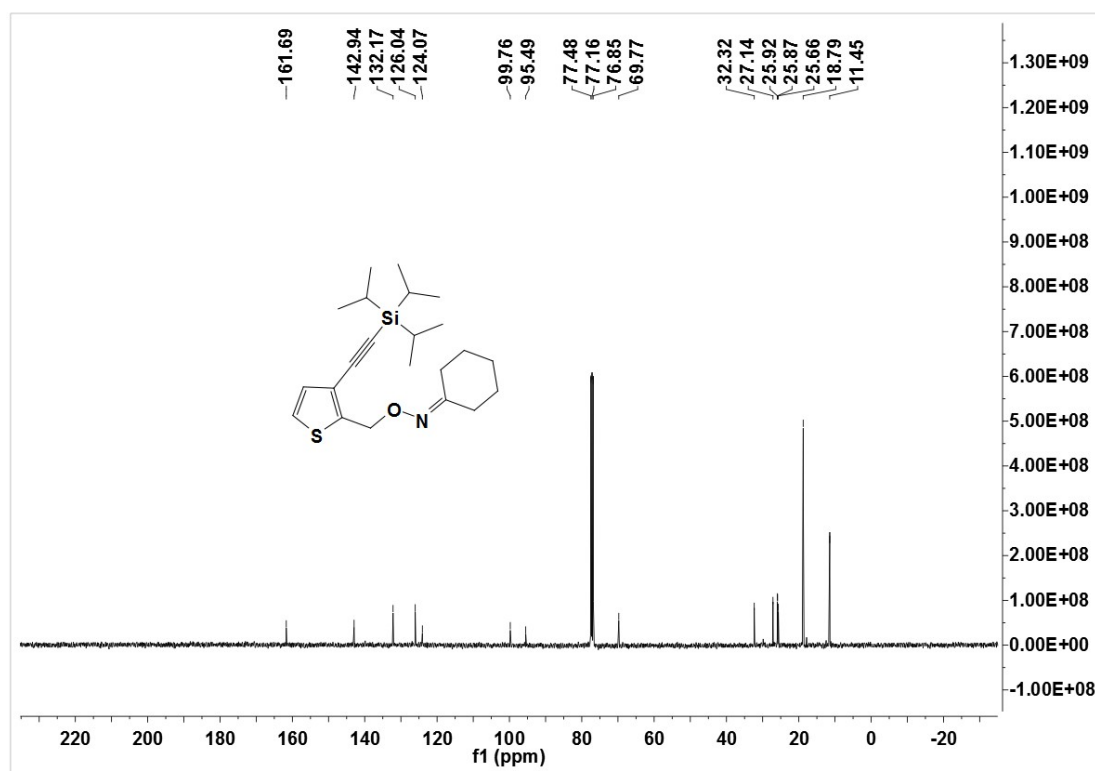

Cyclohexanone *O*-((3-((triisopropylsilyl)ethynyl)furan-2-yl)methyl) oxime (5k)

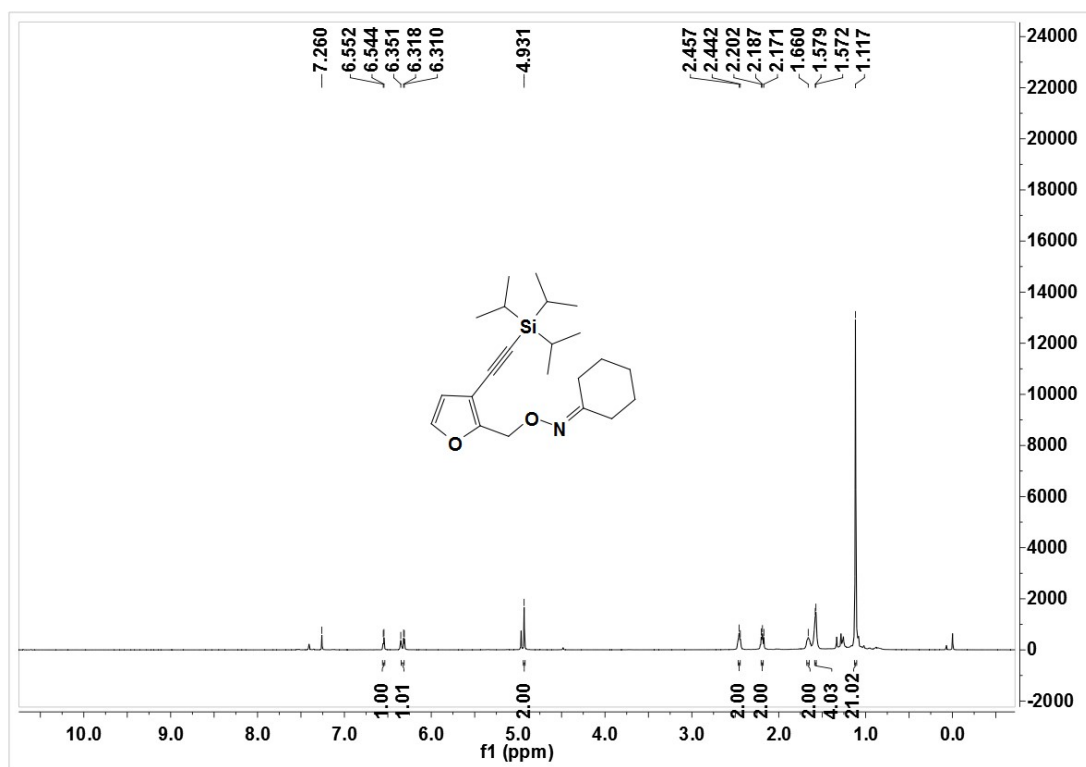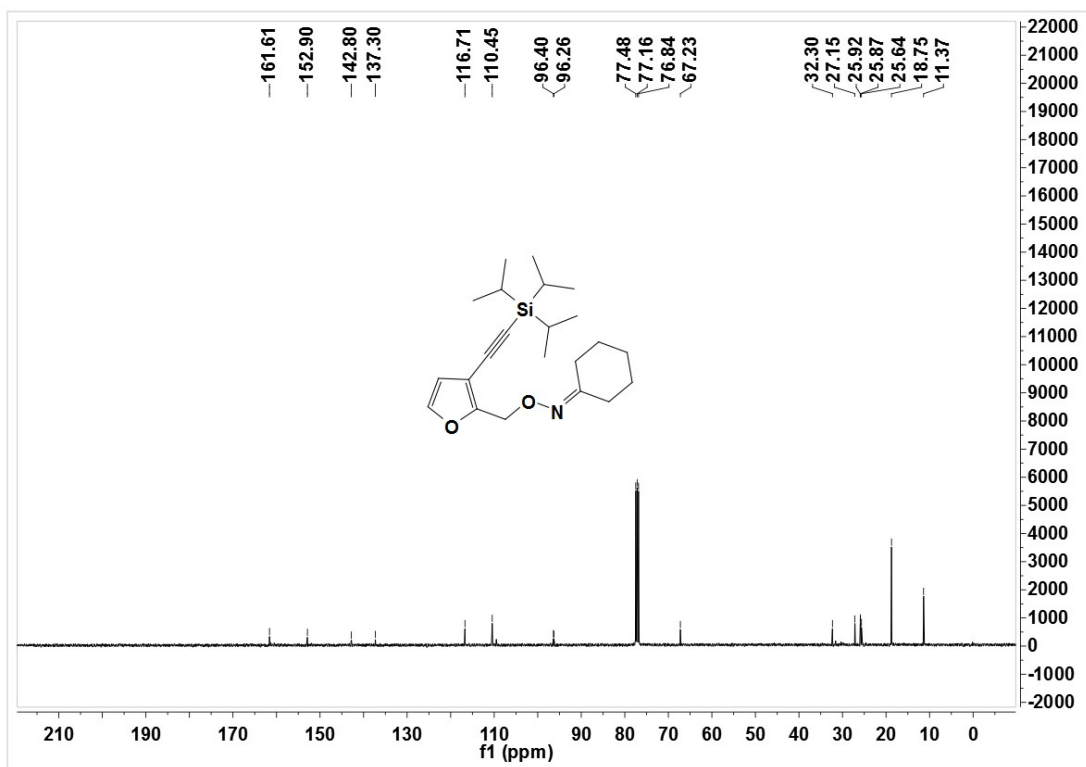

4-(((Cyclohexylideneamino)oxy)methyl)-*N,N*-dipropyl-3-((triisopropylsilyl)

ethynyl)benzenesulfonamide (5l)

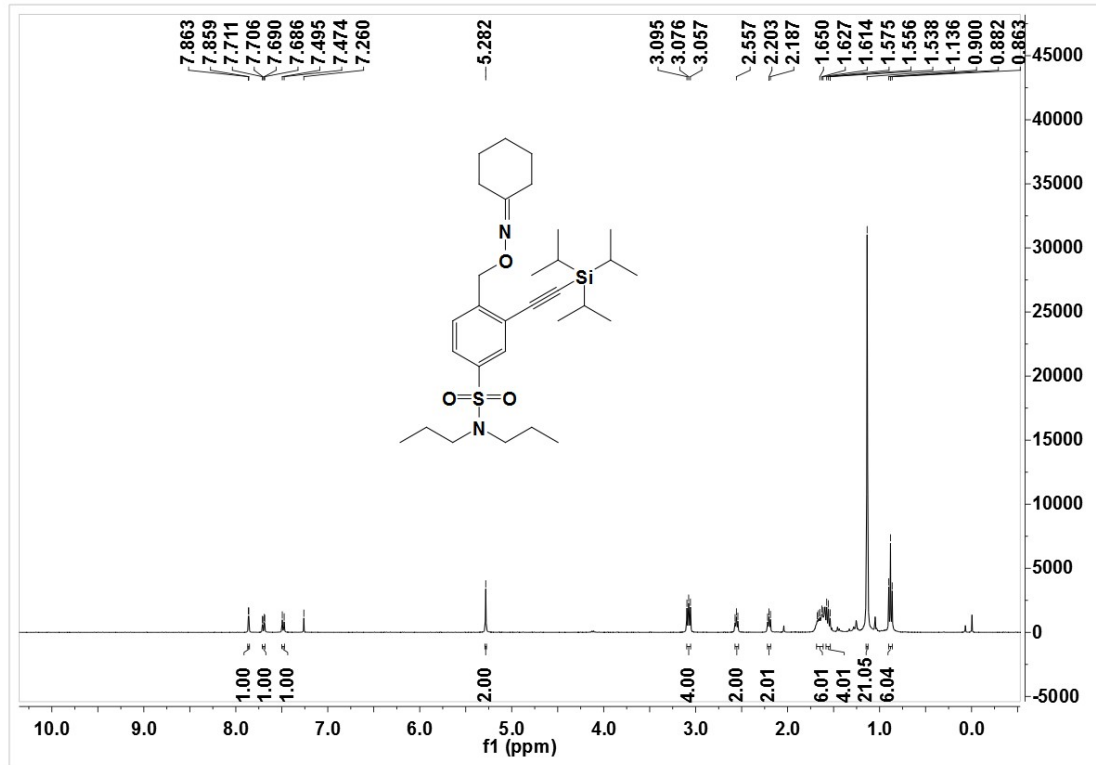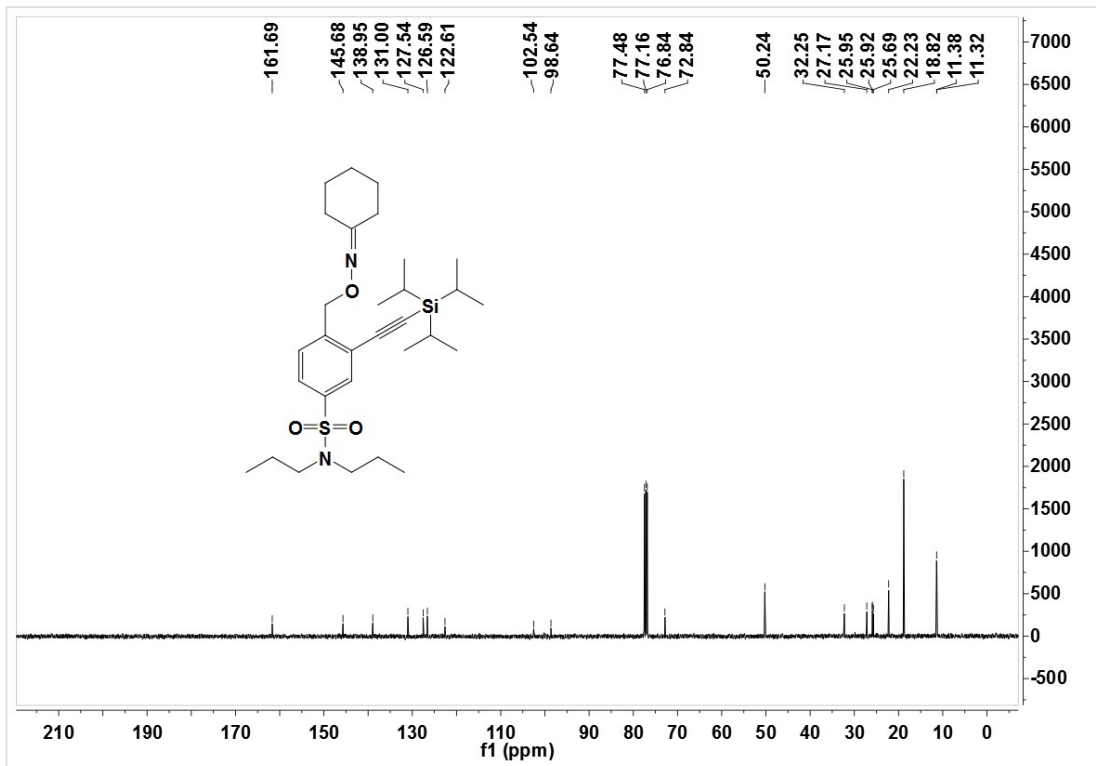

**Cyclohexanone *O*-(4-(diphenylamino)-2-((triisopropylsilyl)ethynyl)benzyl) oxime  
(5m)**

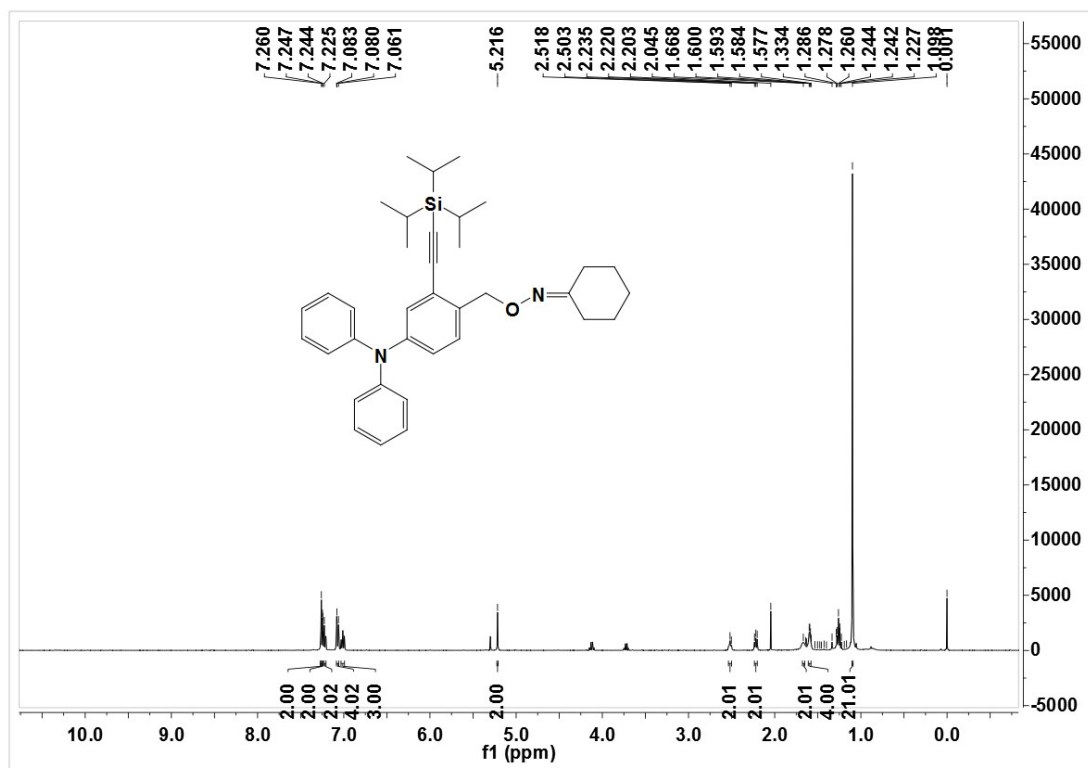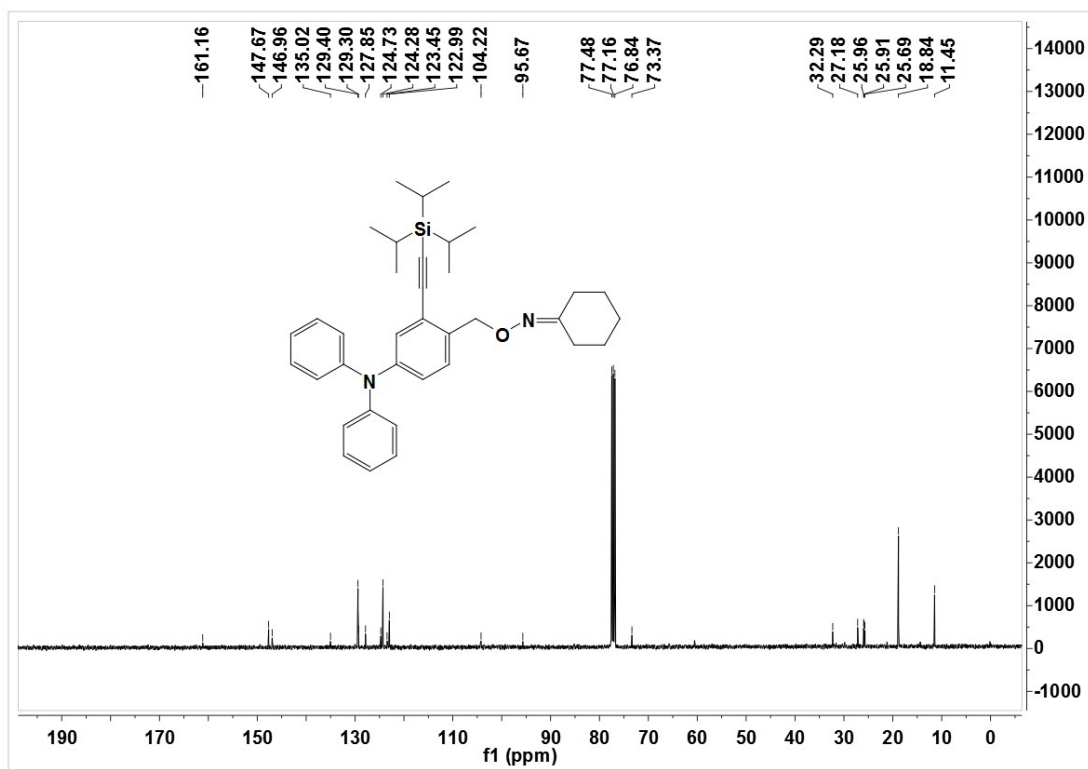

**(*E*)-*N*-(3,5-Bis(trifluoromethyl)phenyl)-2-((2-((triisopropylsilyl)ethynyl)-1*H*-**

indol-3-yl)ethoxy)imino)propanamide (3I')

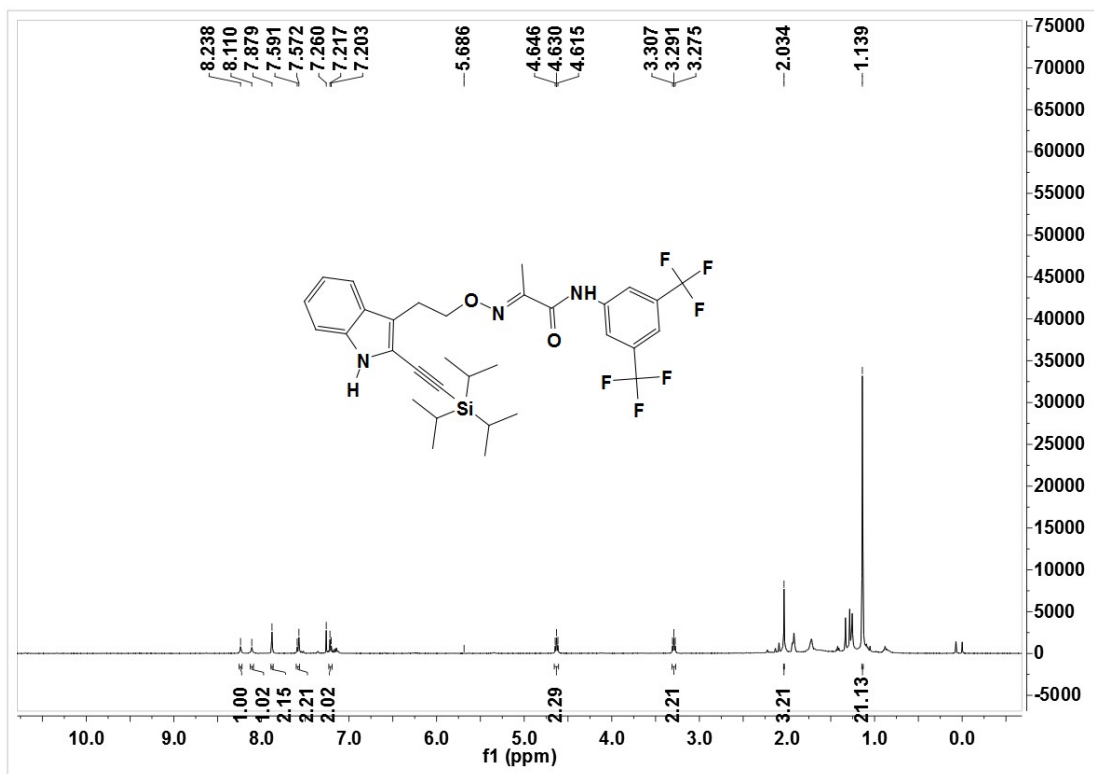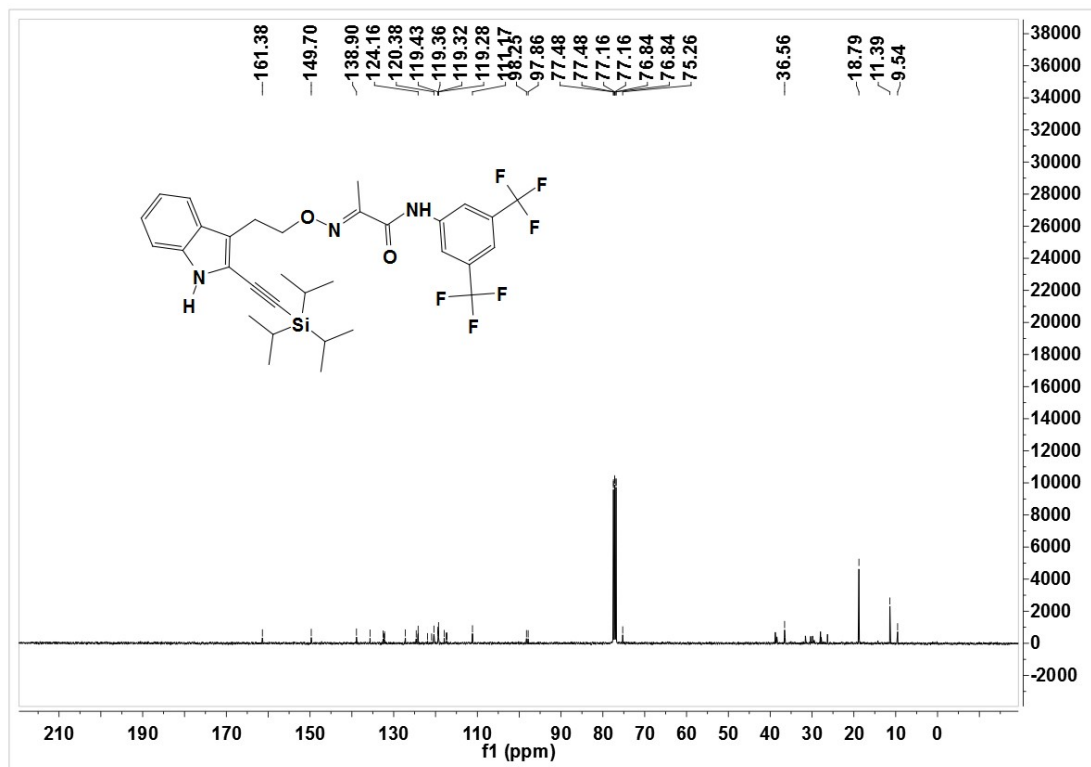

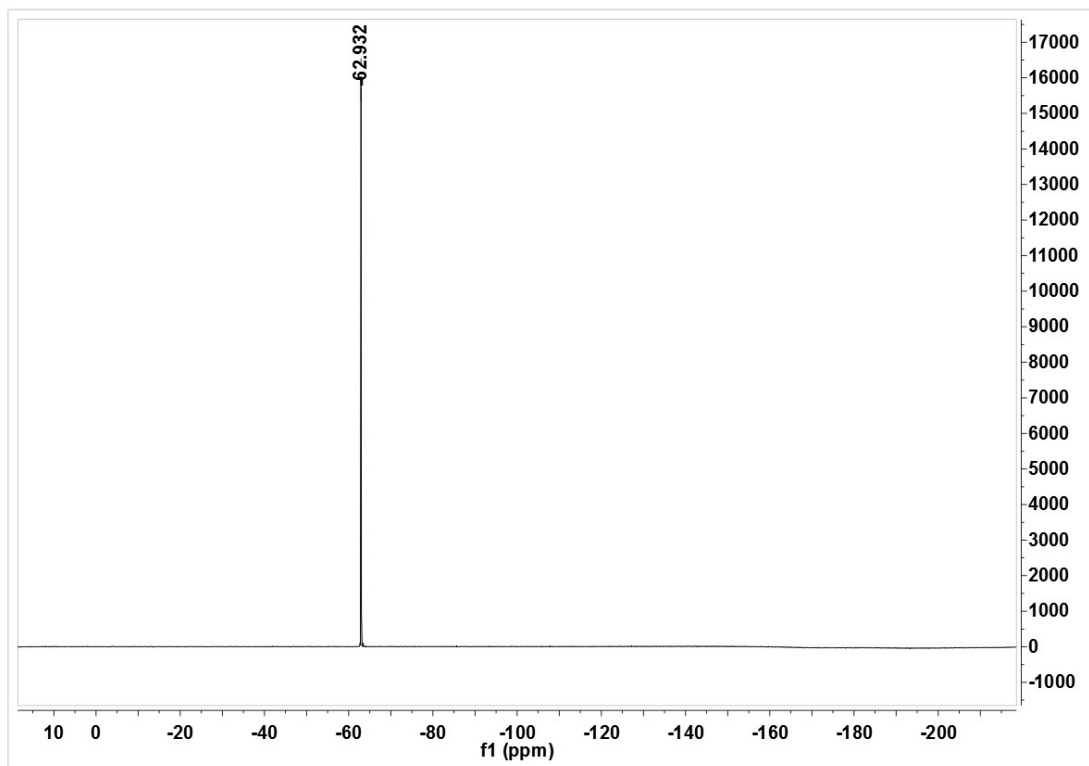

**(2-((Triisopropylsilyl)ethynyl)phenyl)methanol (5a-1)**

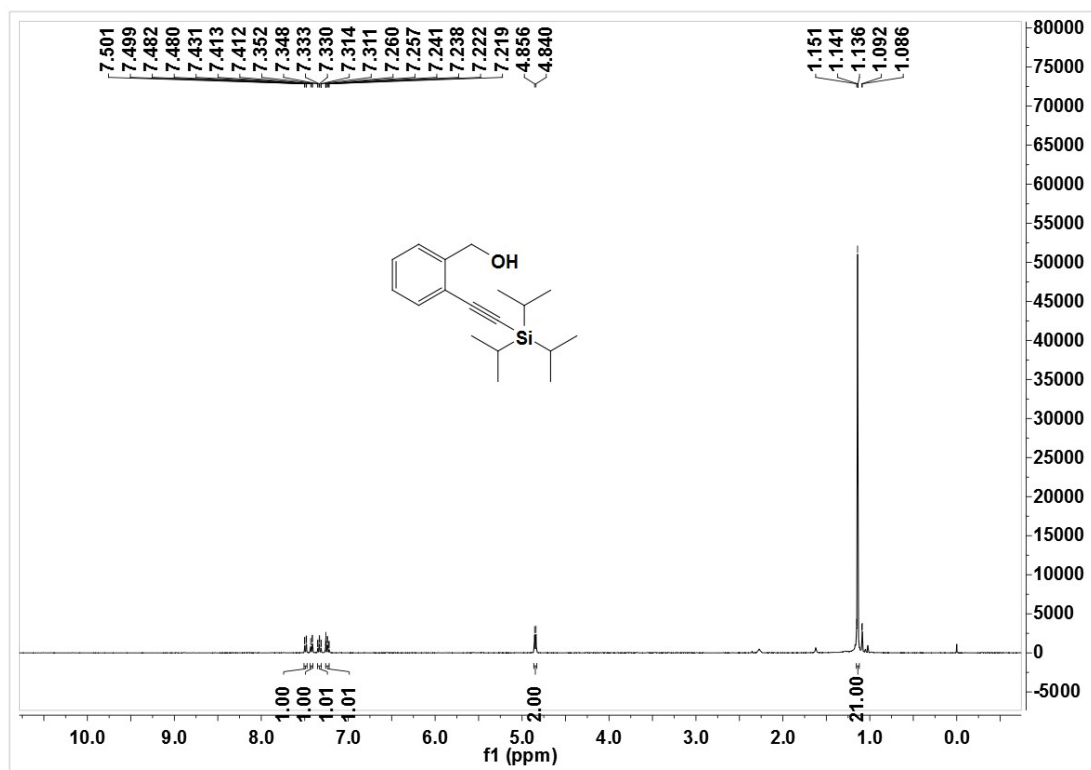

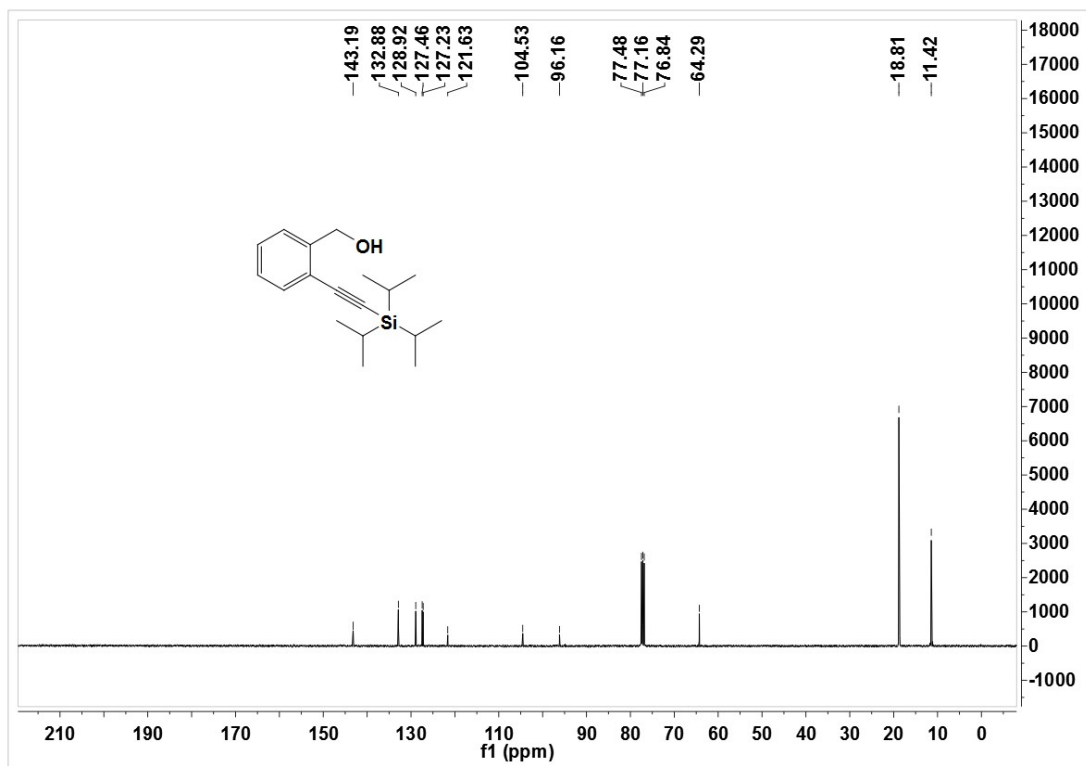

(2-Ethynylphenyl)methanol (5a-2)

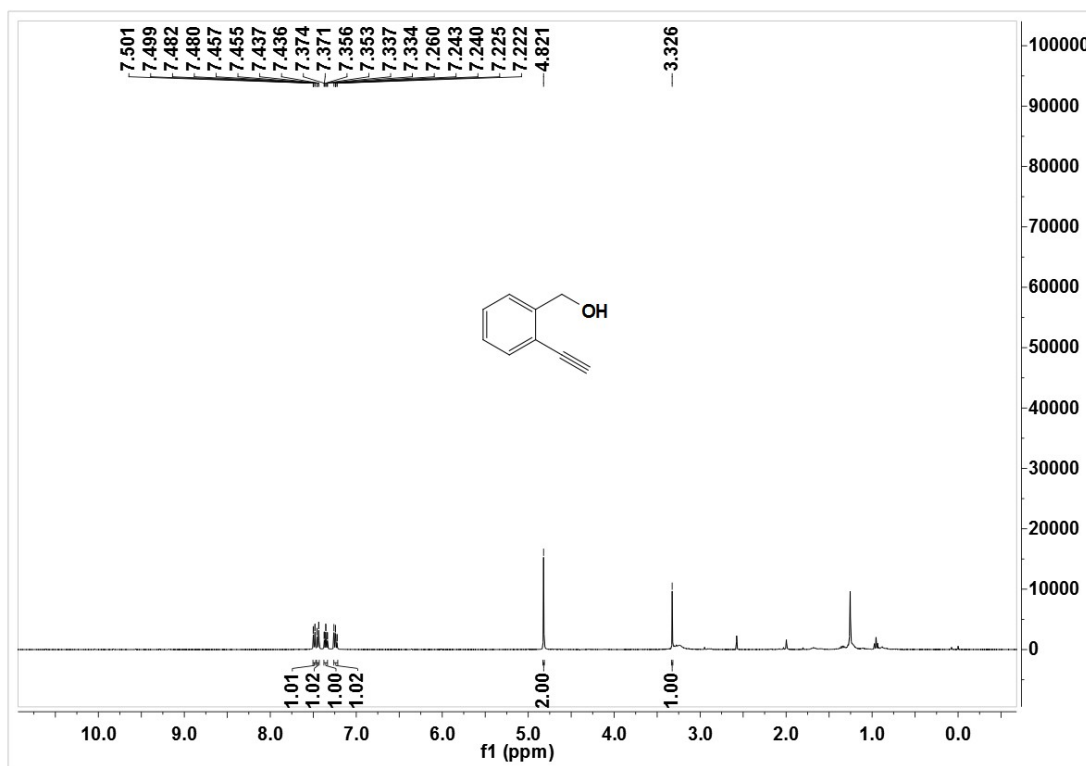



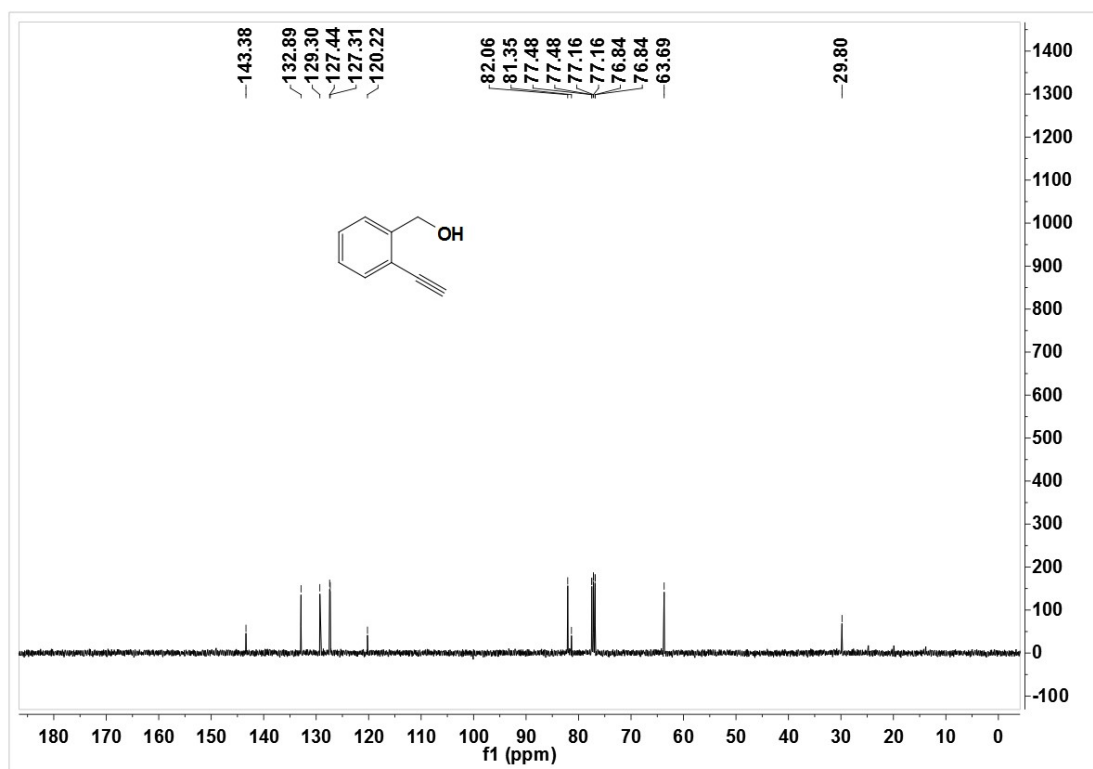

**Methyl 4-((2-(hydroxymethyl)phenyl)ethynyl)benzoate (5a-3)**

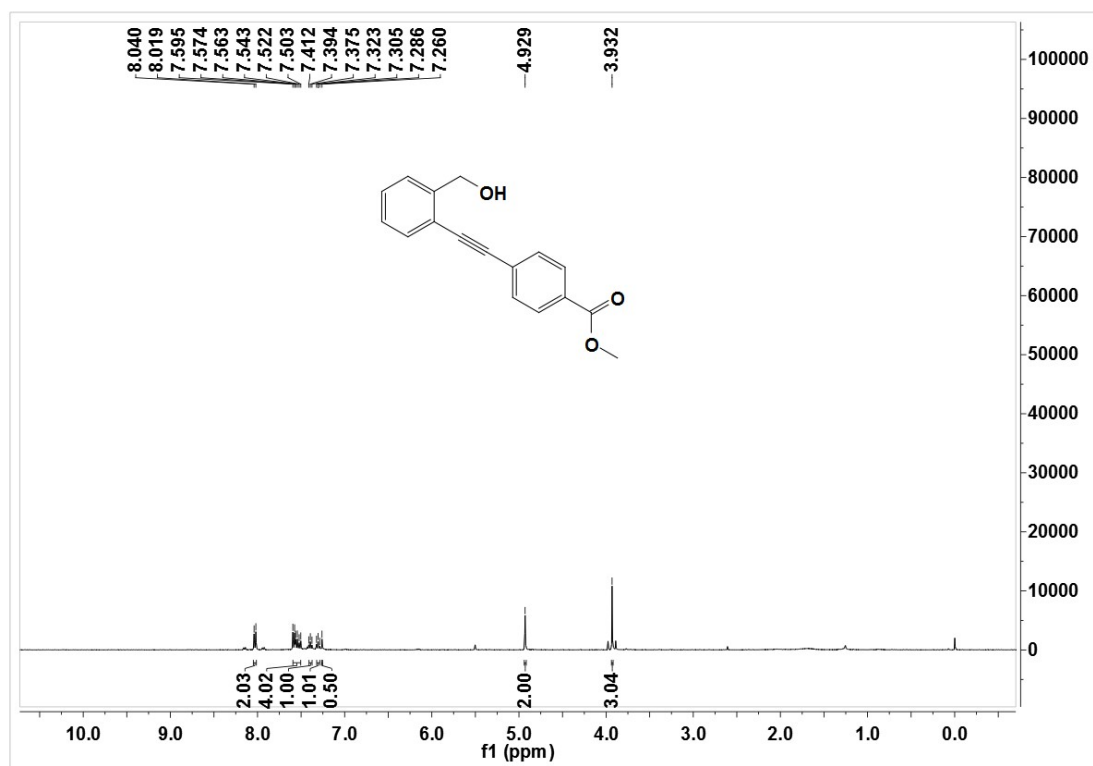

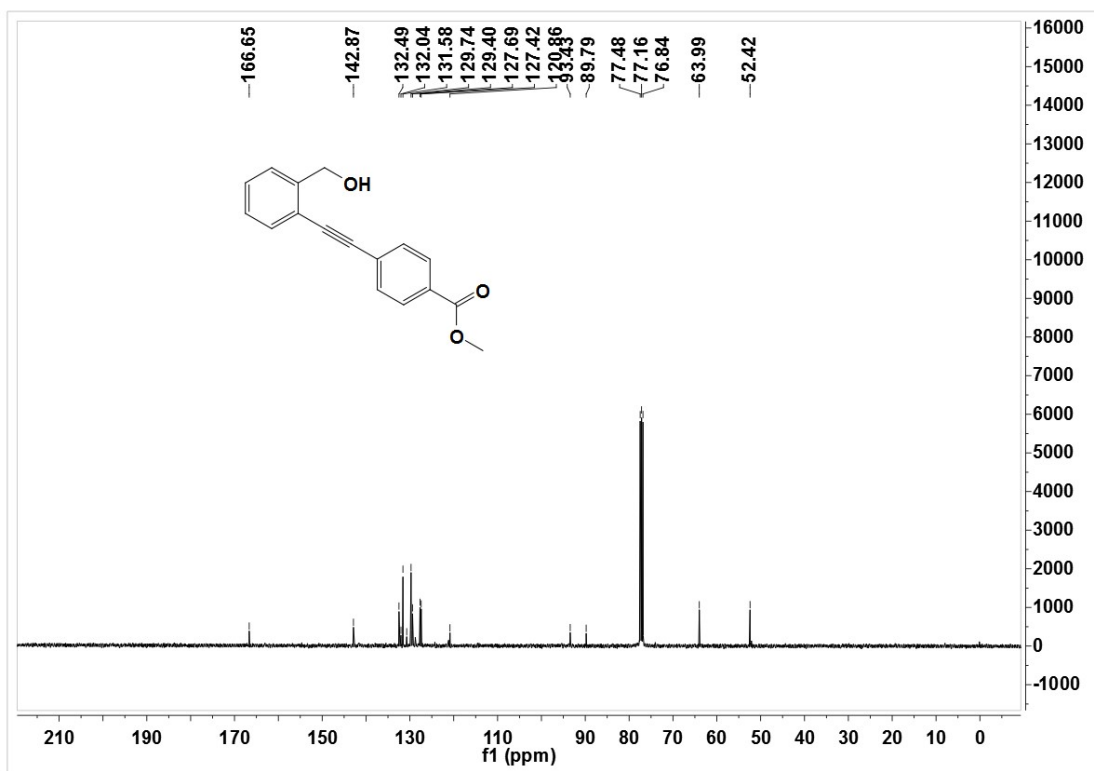

Methyl 4-(4-iodo-1*H*-isochromen-3-yl)benzoate (5a-4)

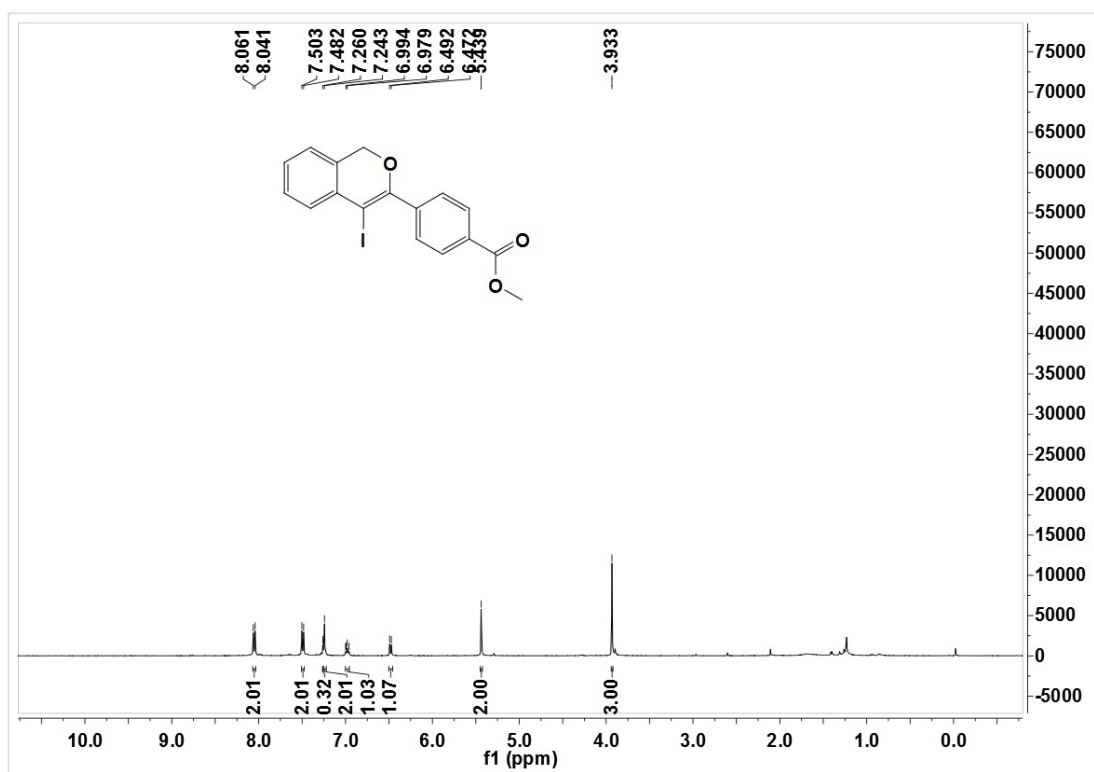

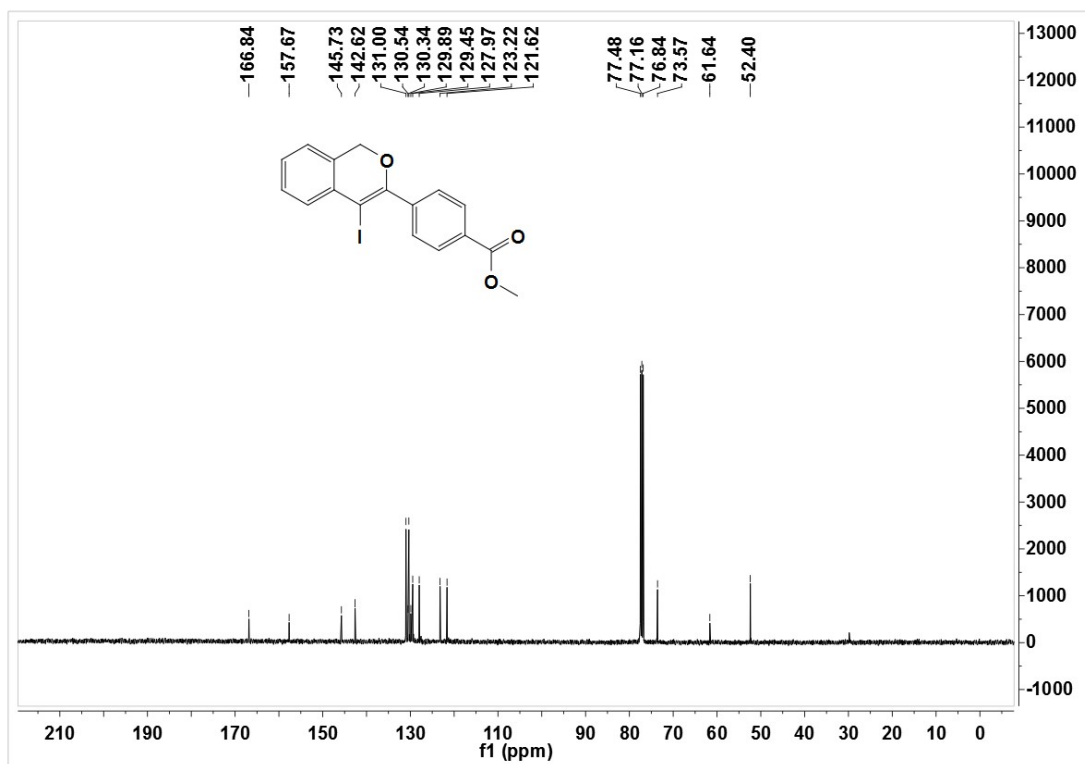

(Z)-2-((Triisopropylsilyl)ethynyl)pent-2-en-1-ol (7a)

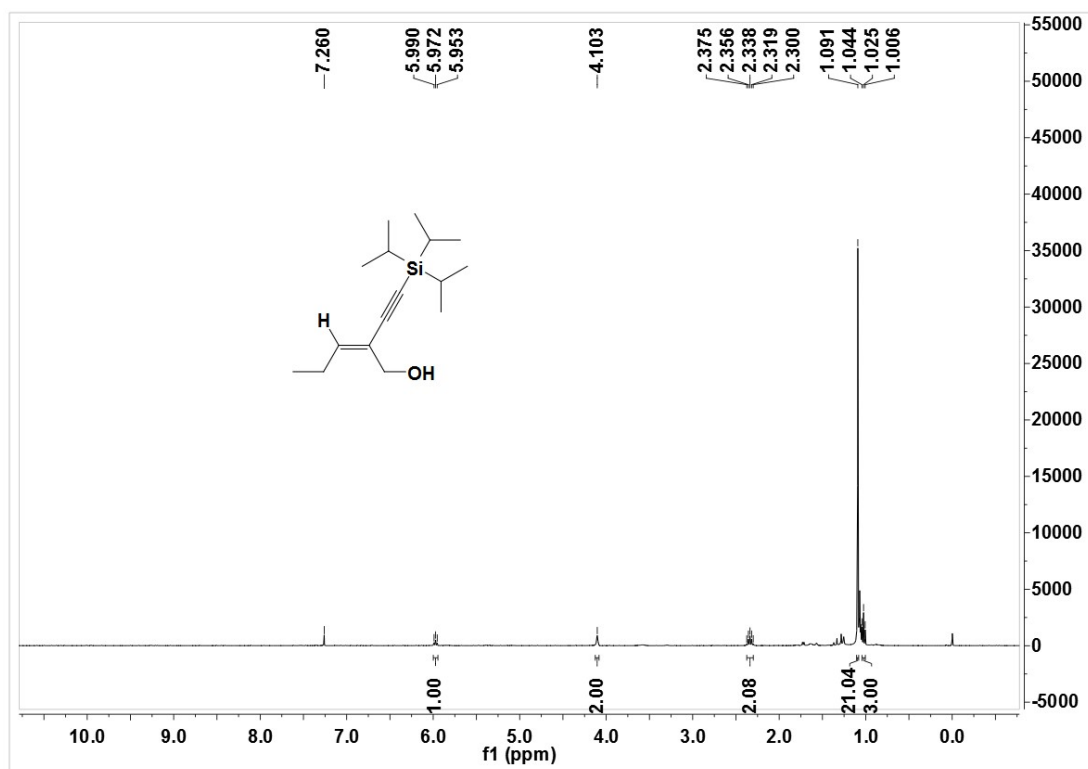

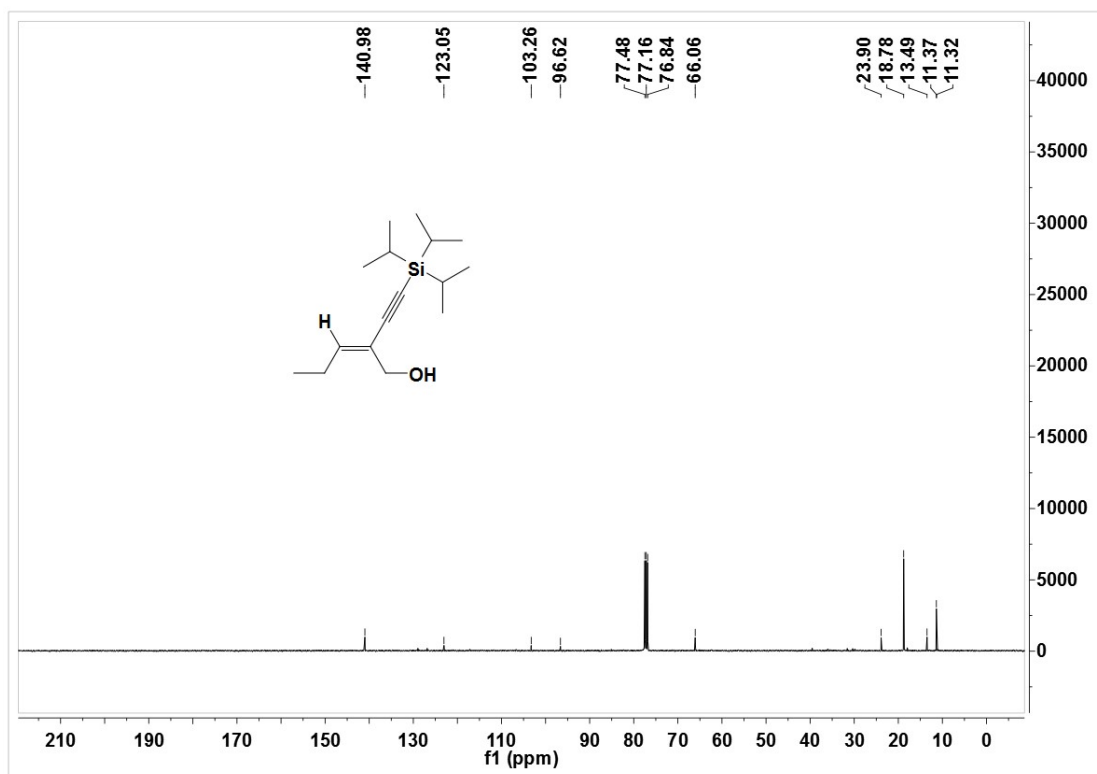

**(E)-3-((Triisopropylsilyl)ethynyl)hex-3-en-1-ol (7b)**

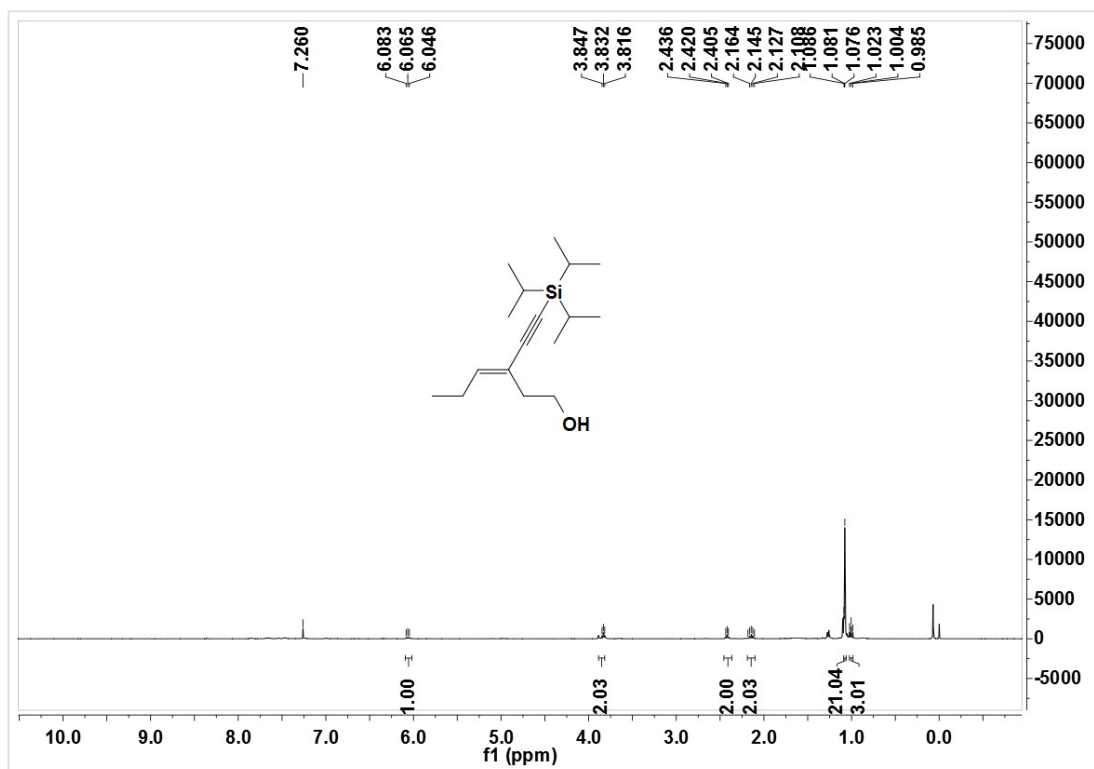

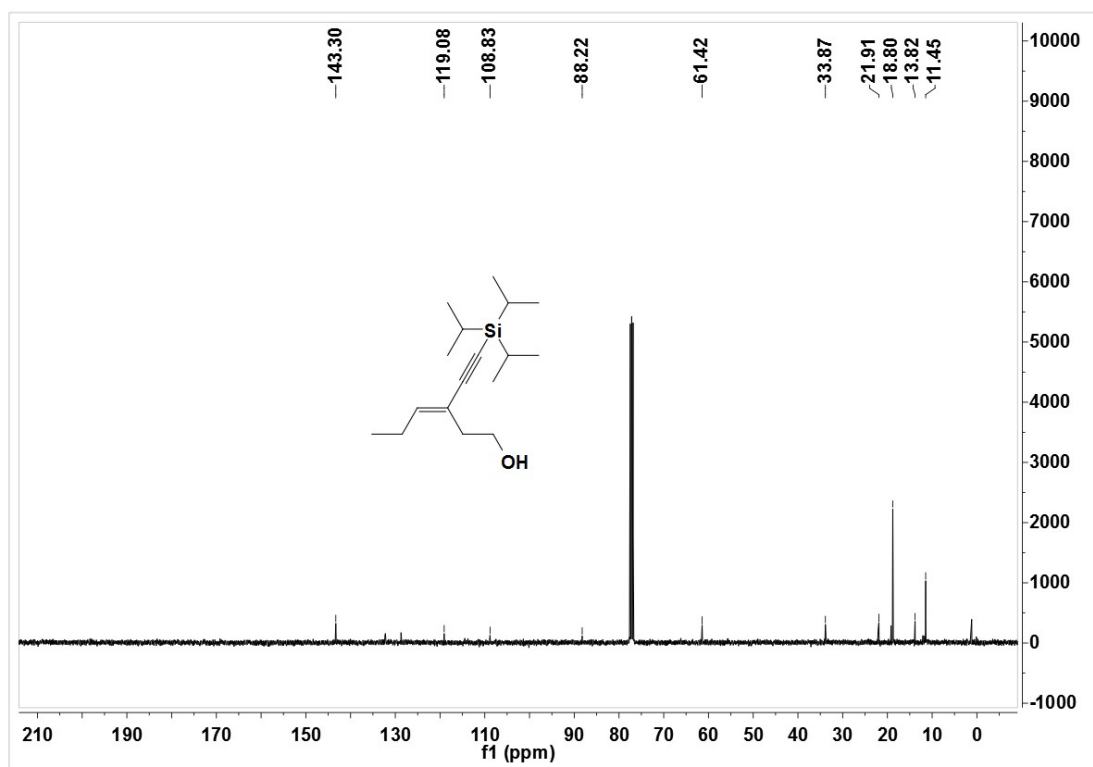

**(Z)-Cyclohexanone O-(4-ethyl-6-(triisopropylsilyl)-3-((triisopropylsilyl) ethynyl) hex-3-en-5-yn-1-yl) oxime (7c)**

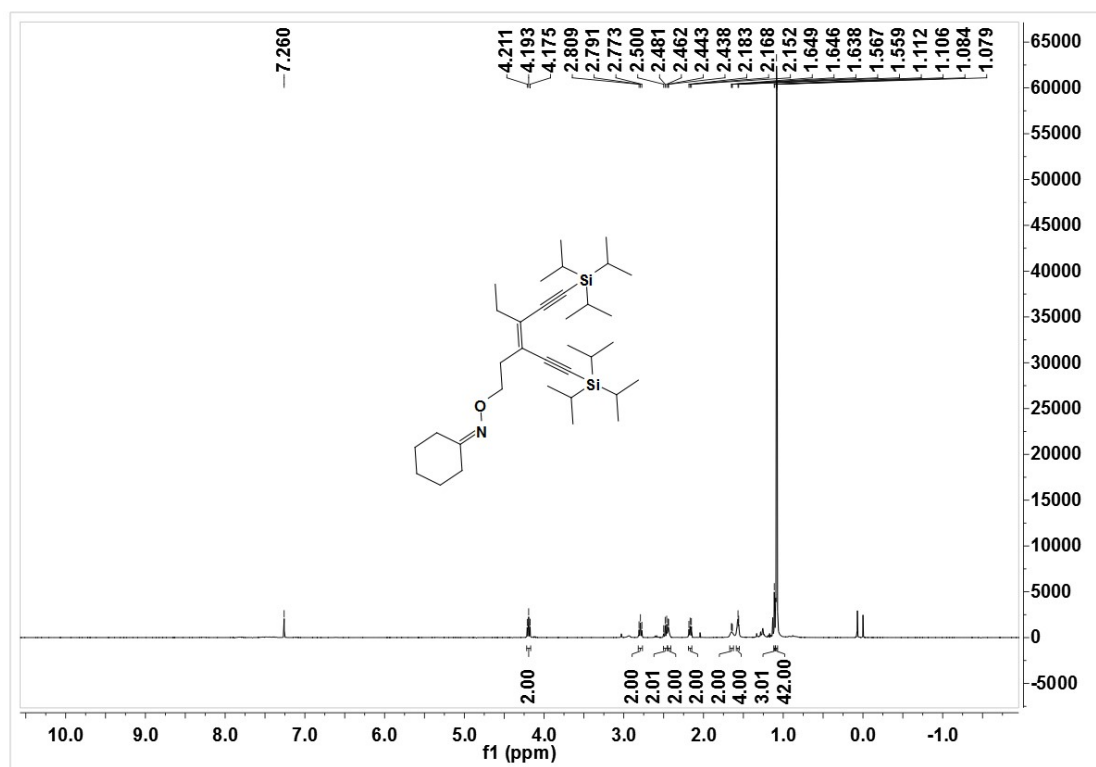

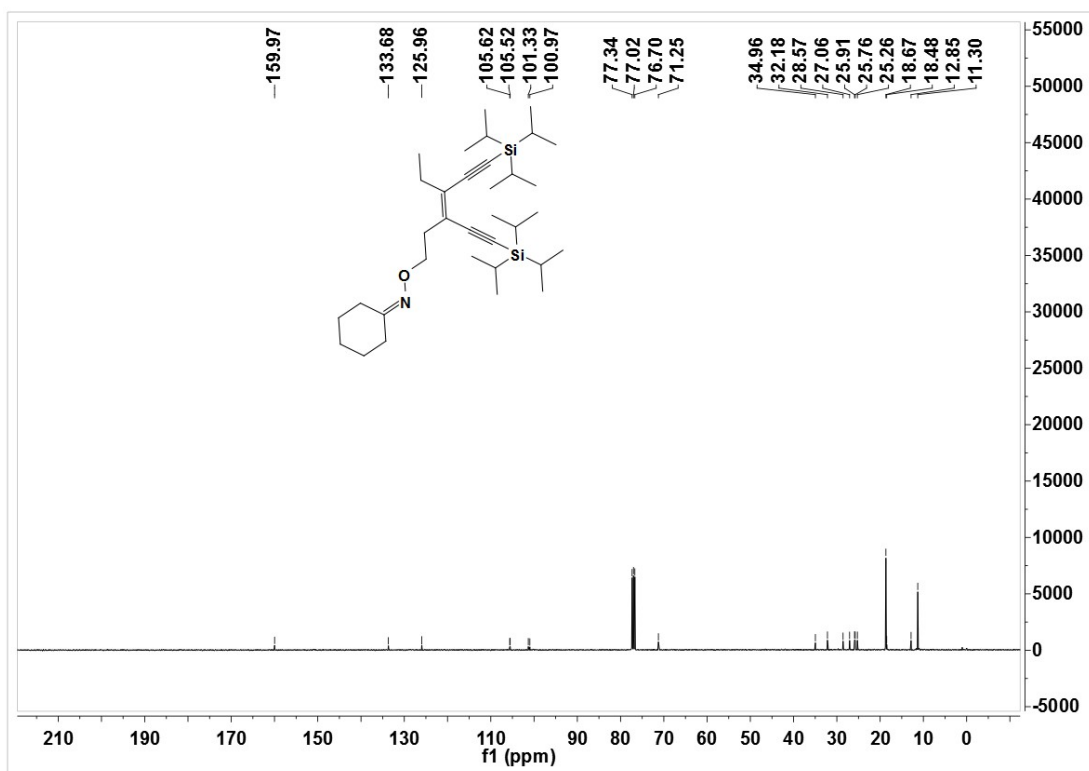

**(E)-N-(3,5-Bis(trifluoromethyl)phenyl)-2-(((2-phenethyl-4-(triisopropylsilyl)but-3-yn-1-yl)oxy)imino)propanamide (10a-3)**

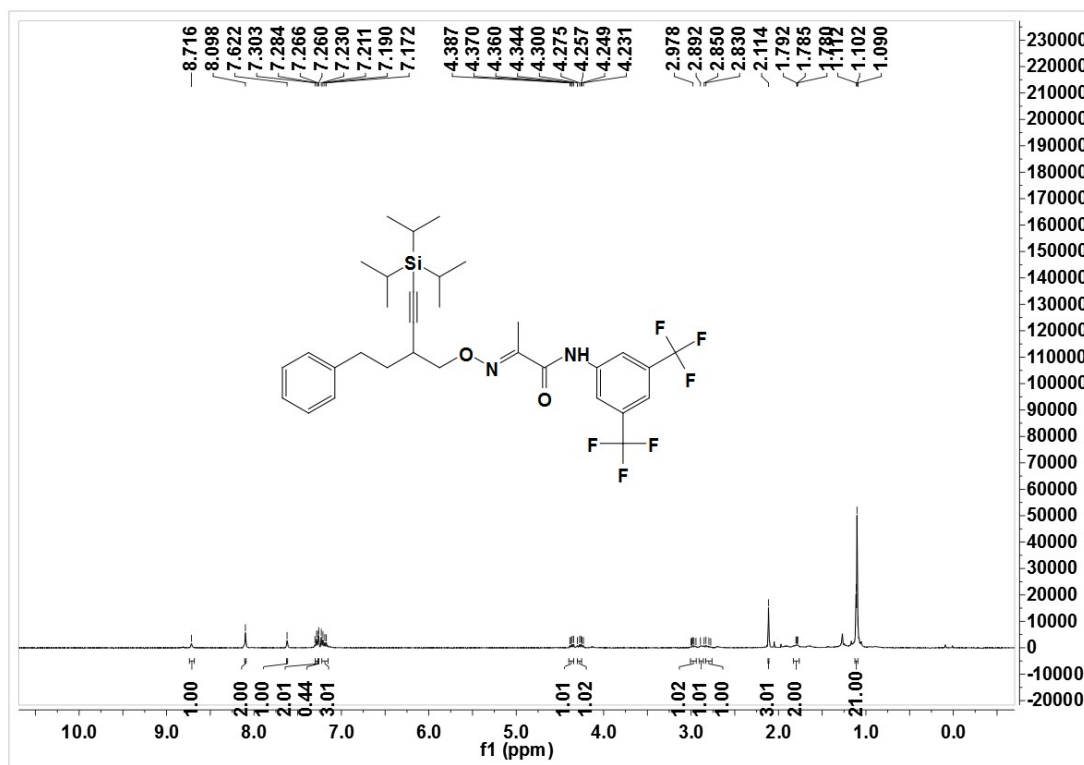

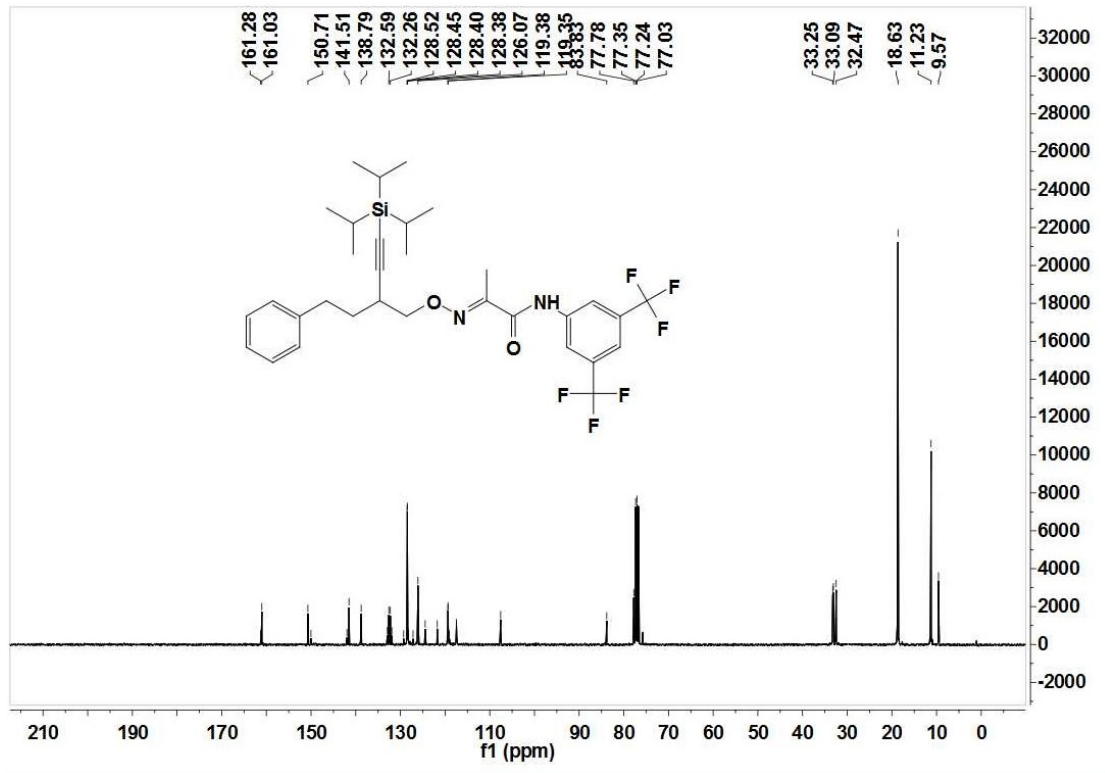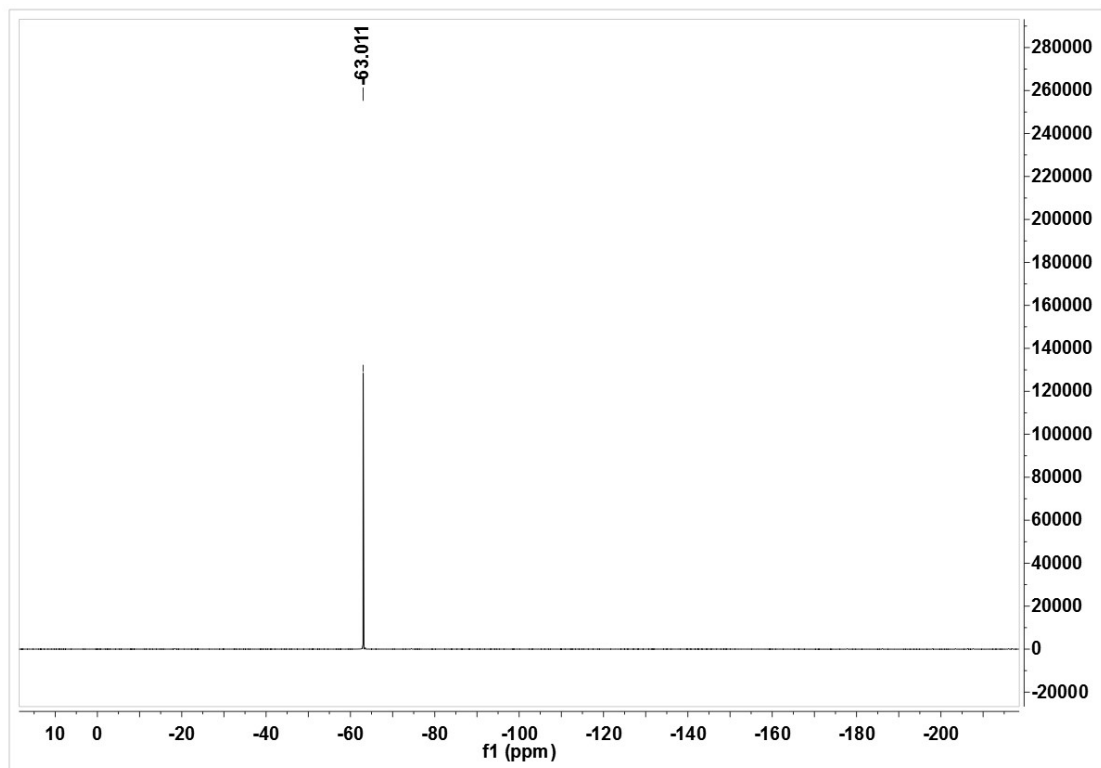

**(E)-2-(((2-Benzyl-4-(triisopropylsilyl)-2-((triisopropylsilyl)ethynyl)but-3-yn-1-yl)oxy)imino)-N-(3,5-bis(trifluoromethyl)phenyl)propanamide (10b)**

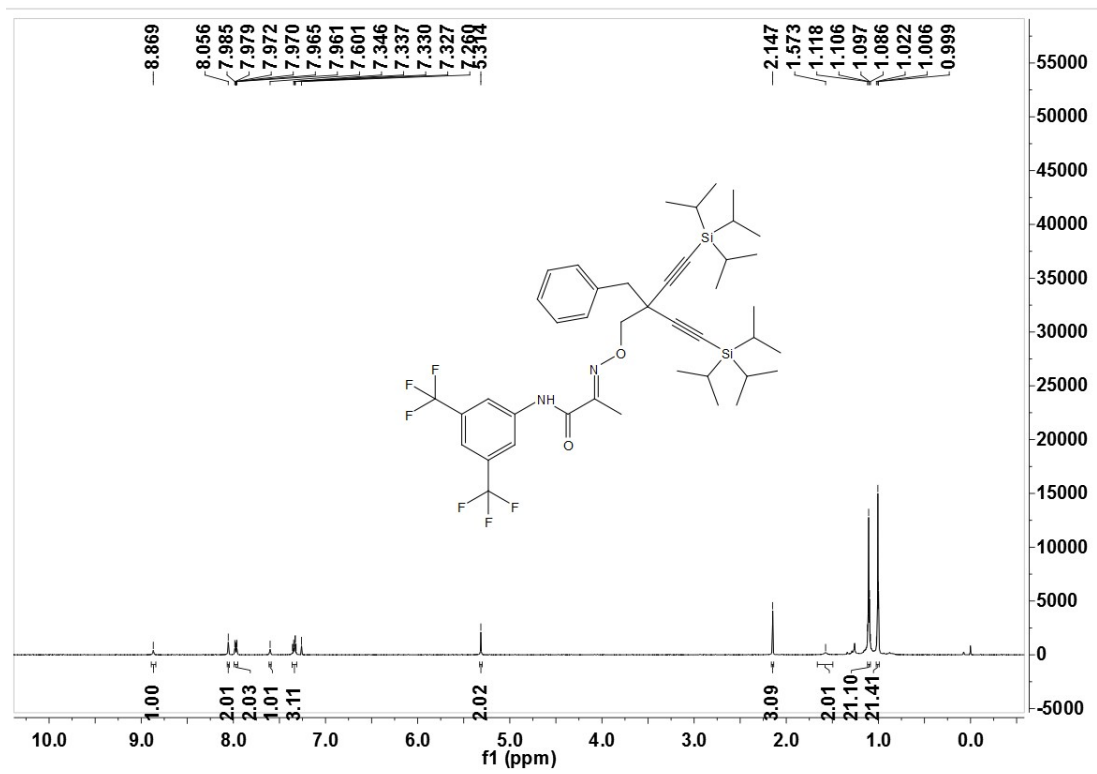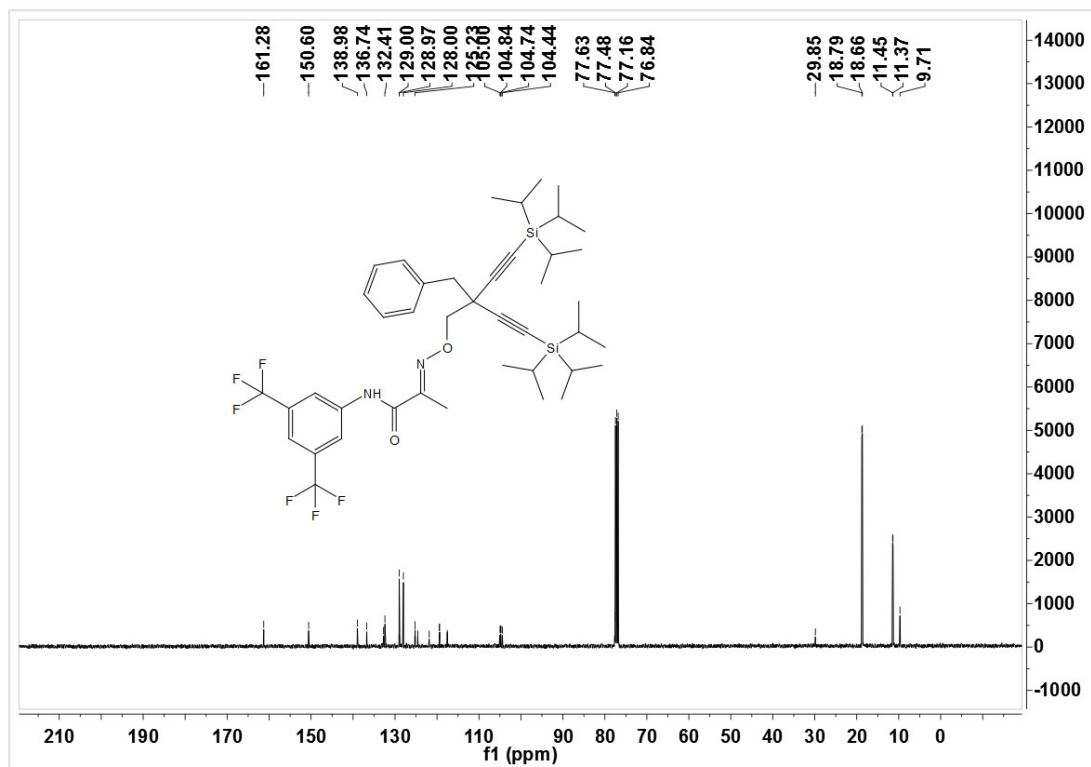



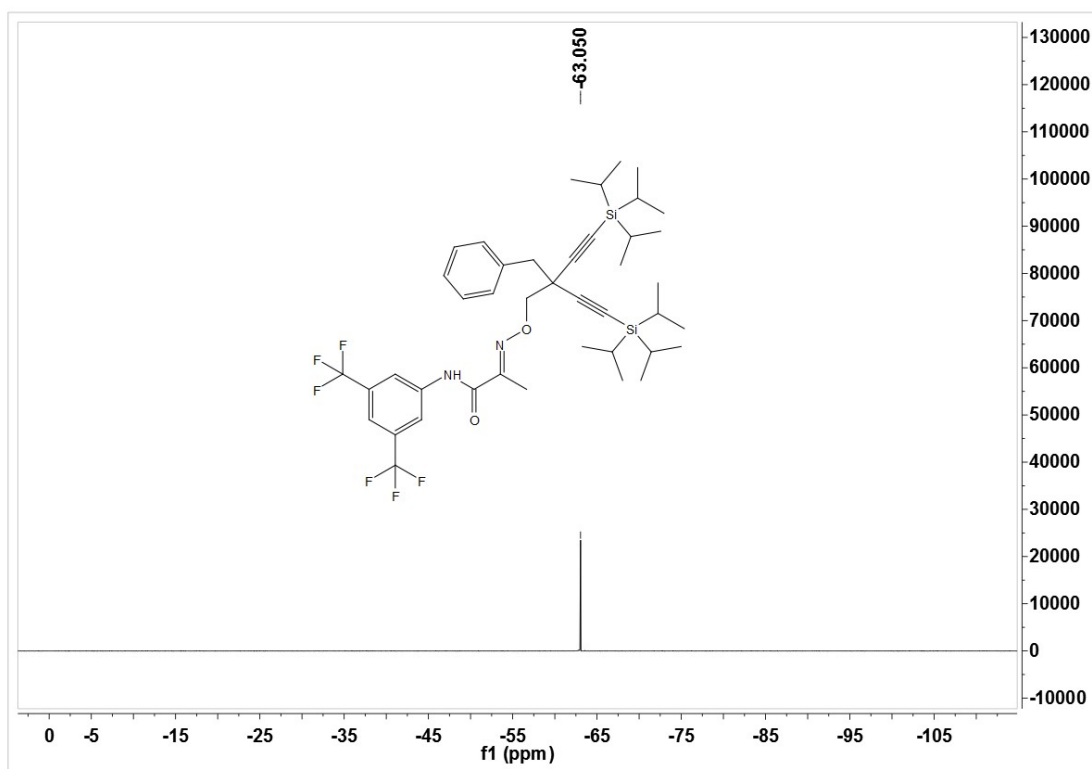

**(E)-N-(3,5-Bis(trifluoromethyl)phenyl)-2-(((2-(4-((4-fluorobenzyl)oxy)benzyl)-4-(triisopropylsilyl)but-3-yn-1-yl)oxy)imino)propanamide (10c)**

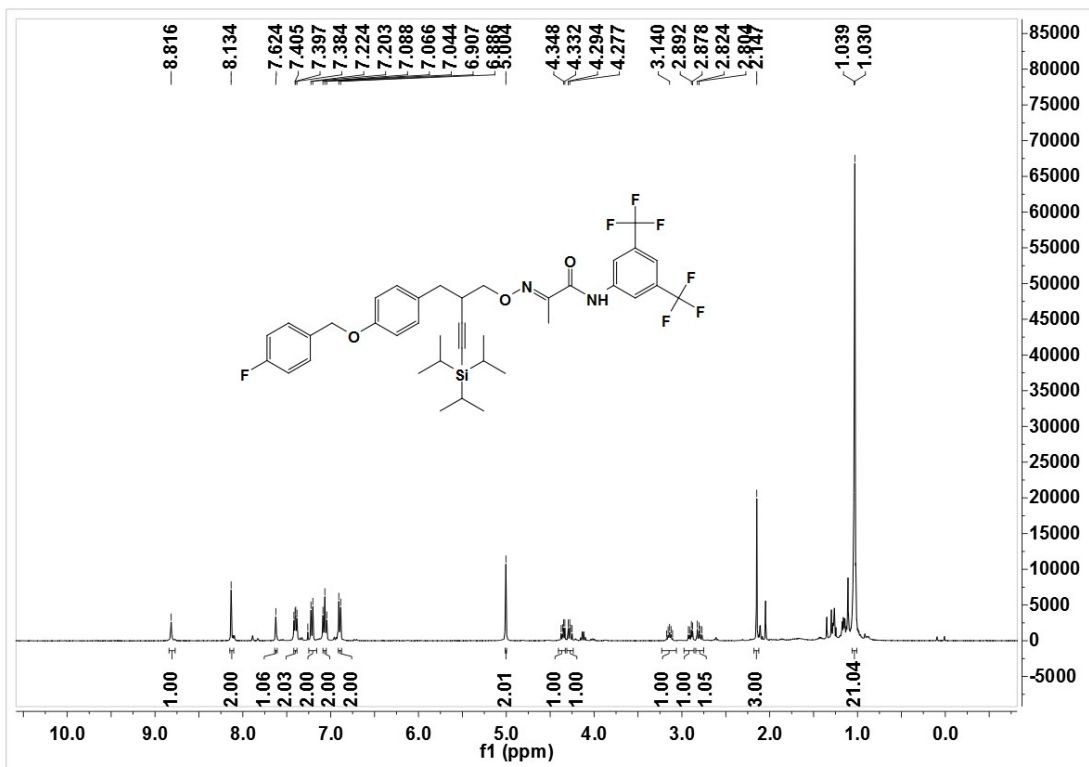

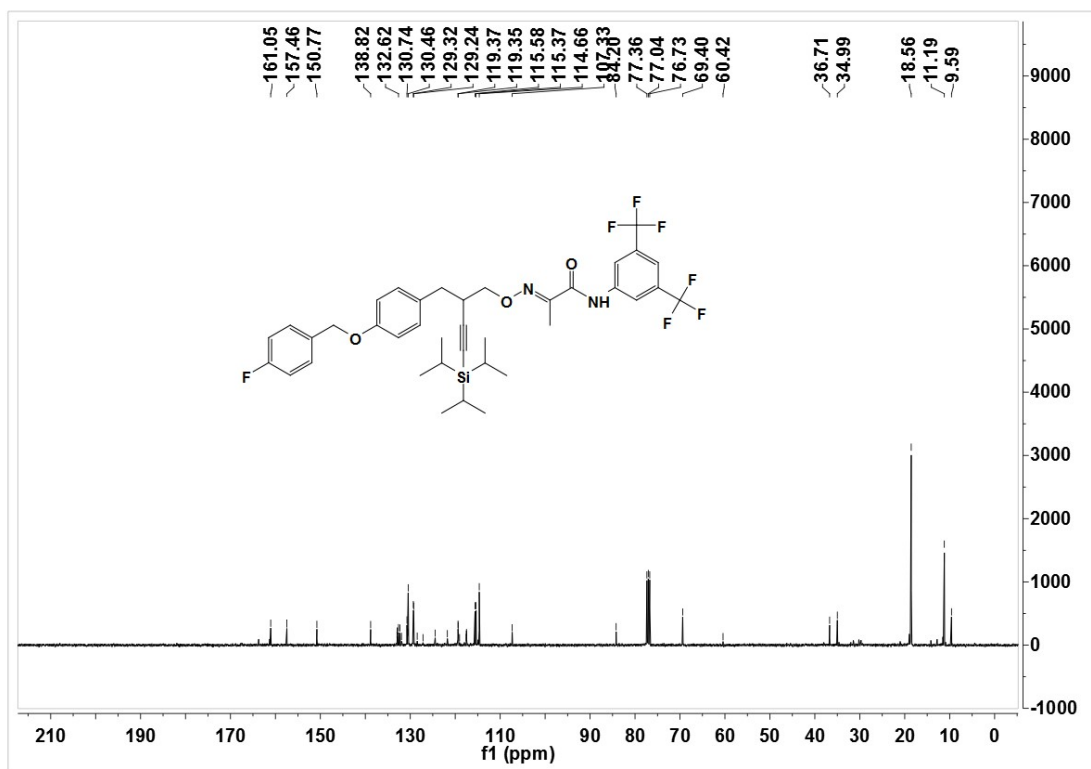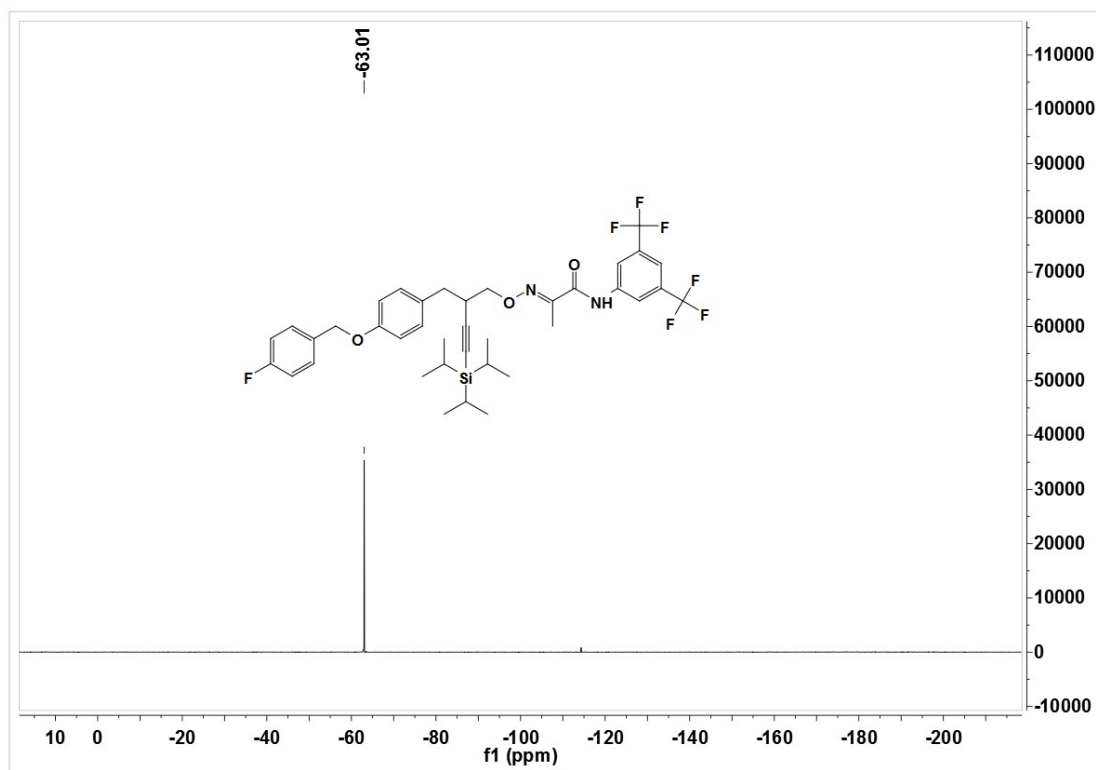

**(E)-N-(3,5-Bis(trifluoromethyl)phenyl)-2-(((2-(4-phenoxybenzyl)-4-(triisopropylsilyl)but-3-yn-1-yl)oxy)imino)propanamide (10d)**

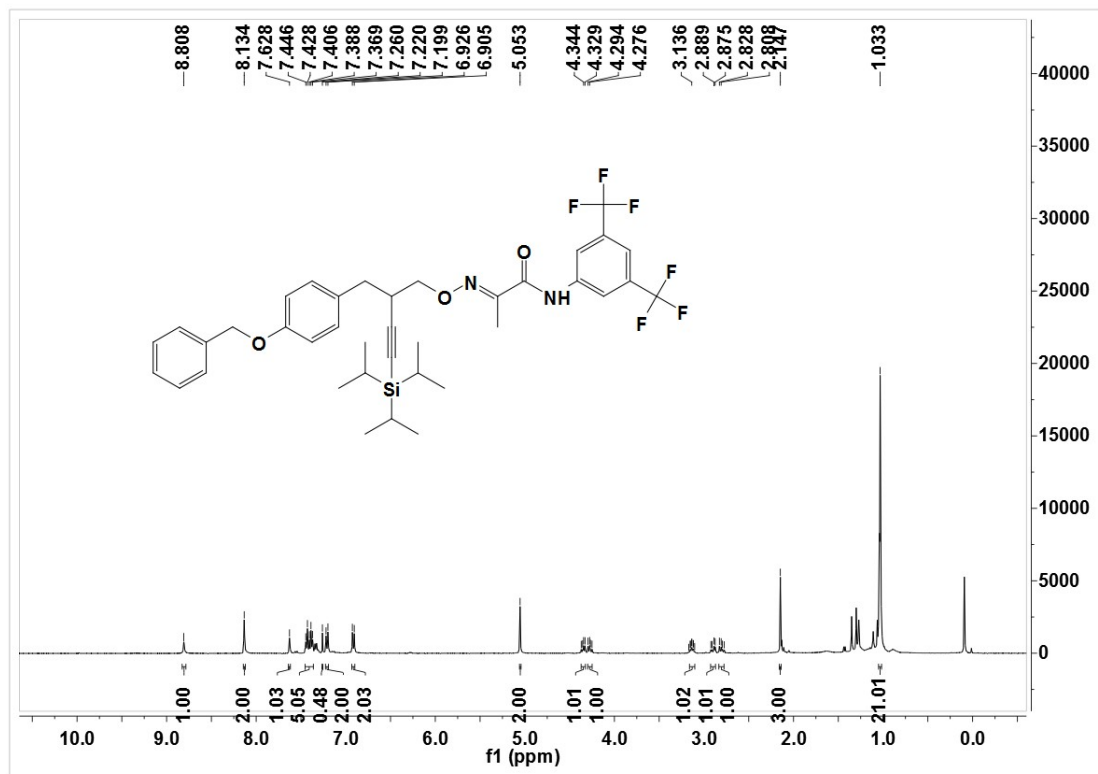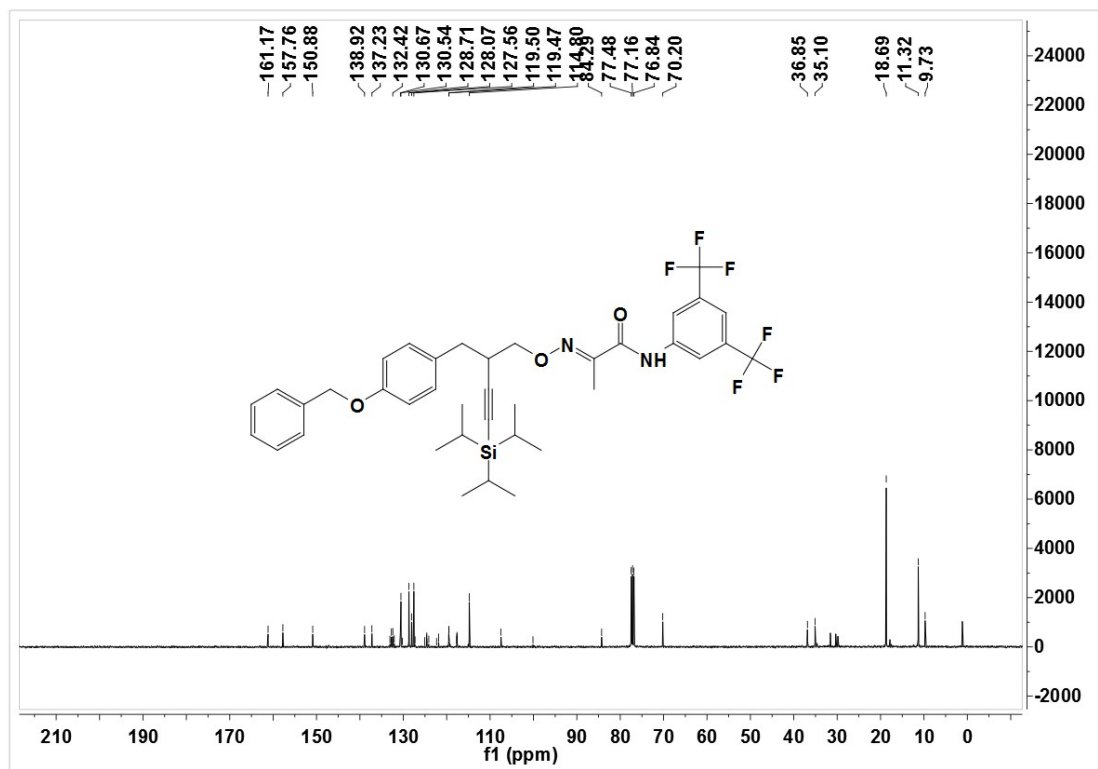

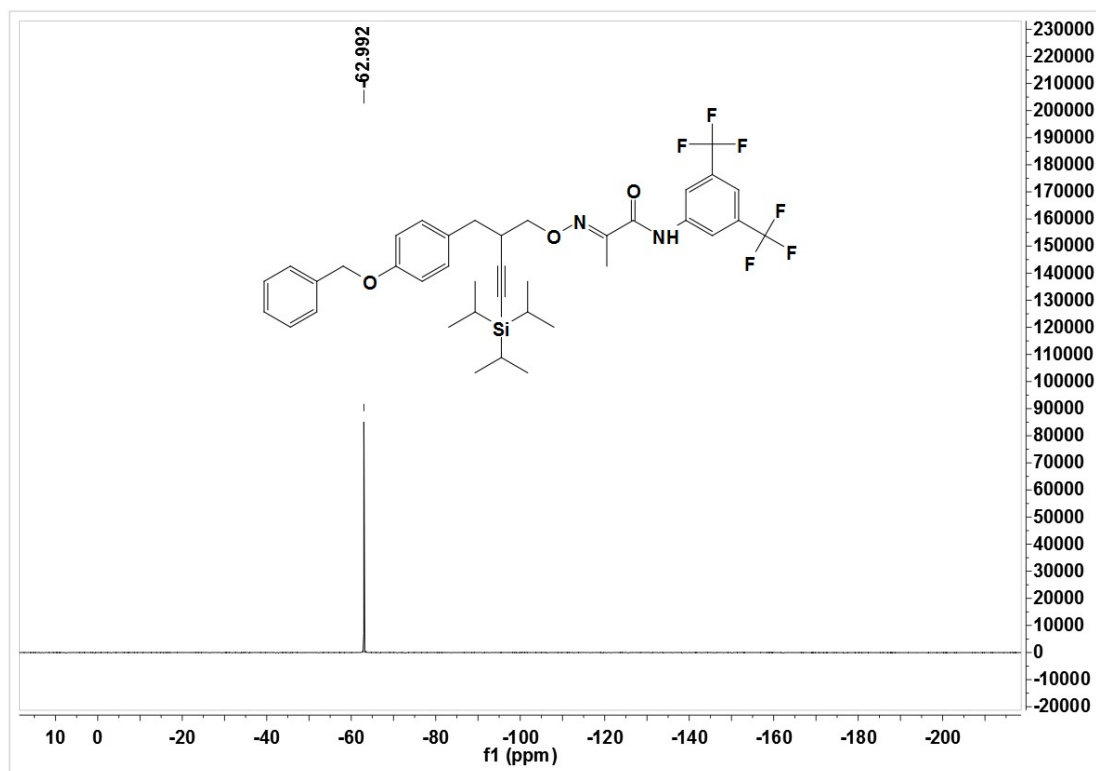

**(E)-N-(3,5-Bis(trifluoromethyl)phenyl)-2-(((2-(4-(4-bromobenzyl)oxy)benzyl)-4-(triisopropylsilyl)but-3-yn-1-yl)oxy)imino)propanamide (10e)**

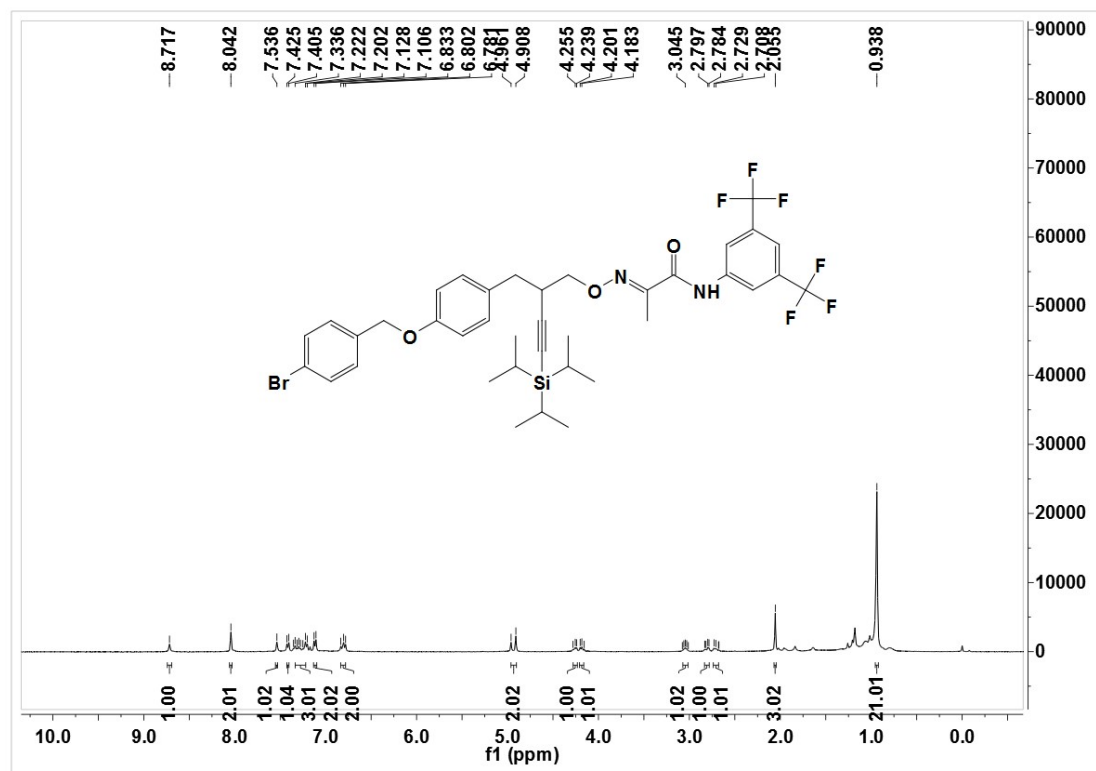

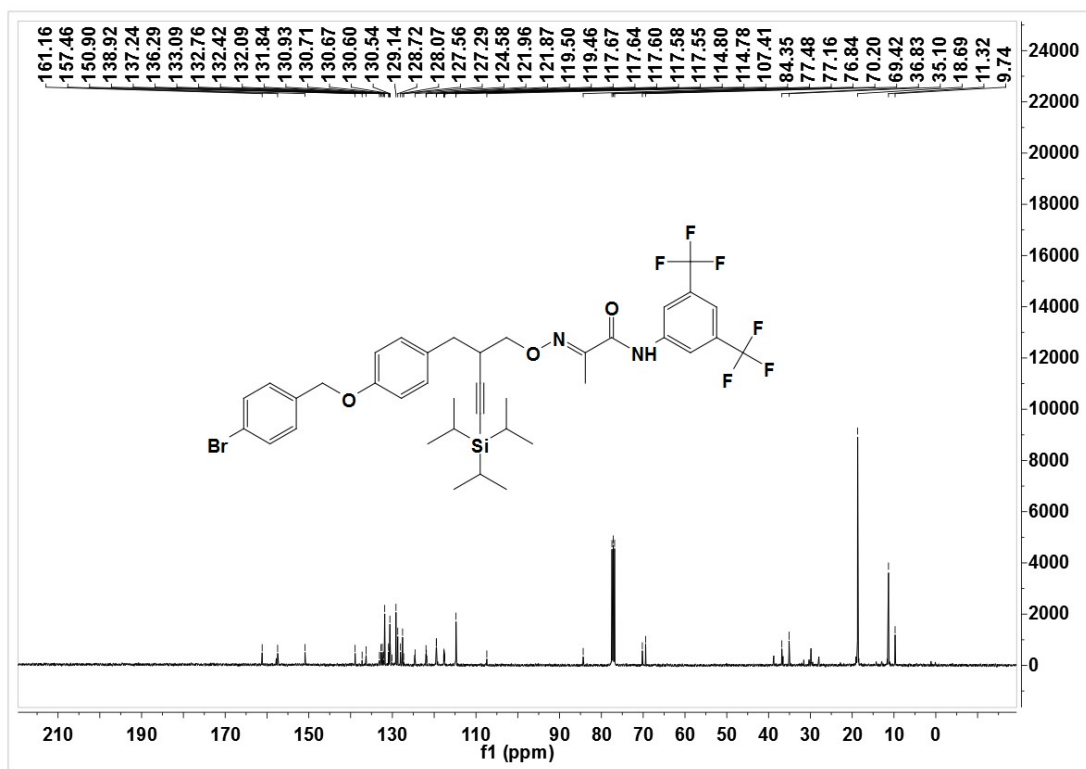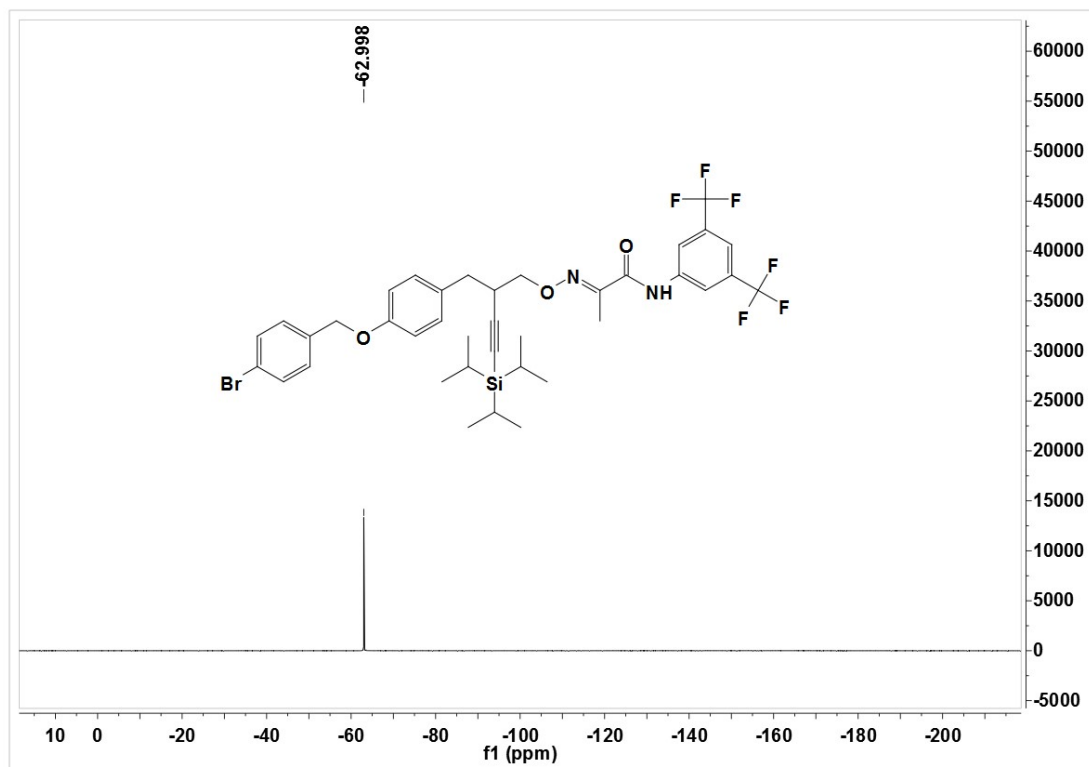

**(E)-N-(3,5-Bis(trifluoromethyl)phenyl)-2-(((2-(4-methoxybenzyl)-4-(triisopropylsilyl)-2-((triisopropylsilyl)ethynyl)but-3-yn-1-yl)oxy)imino)propanamide (10f)**

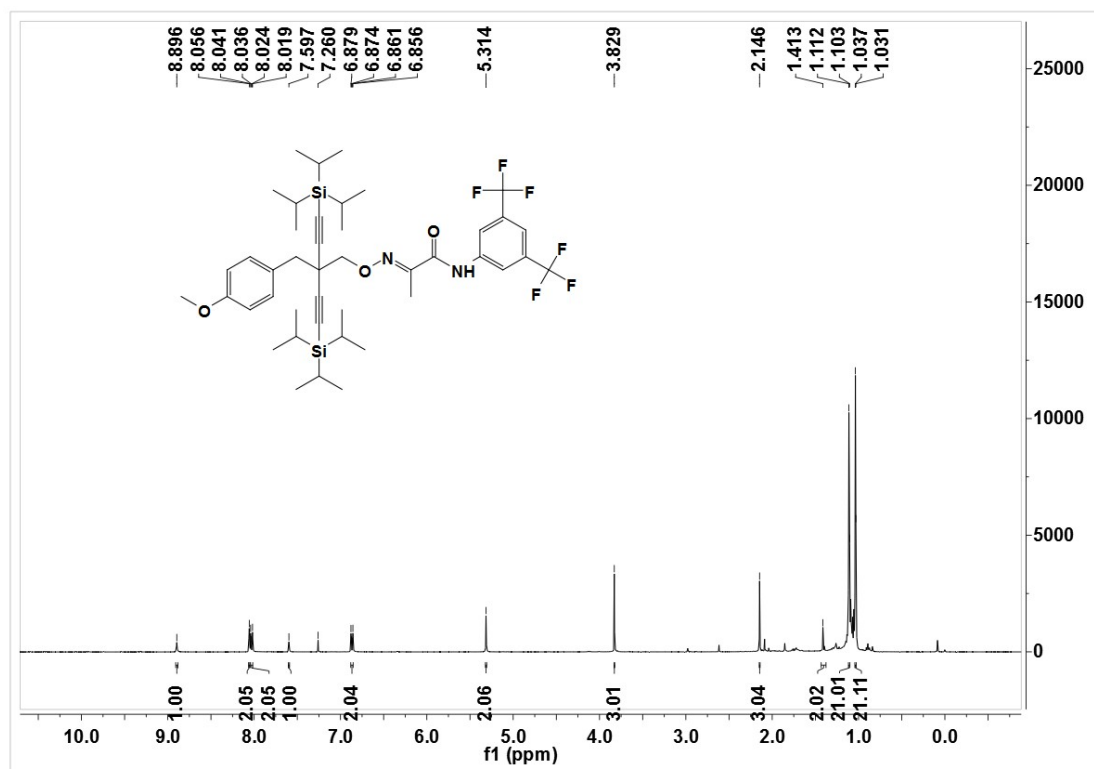

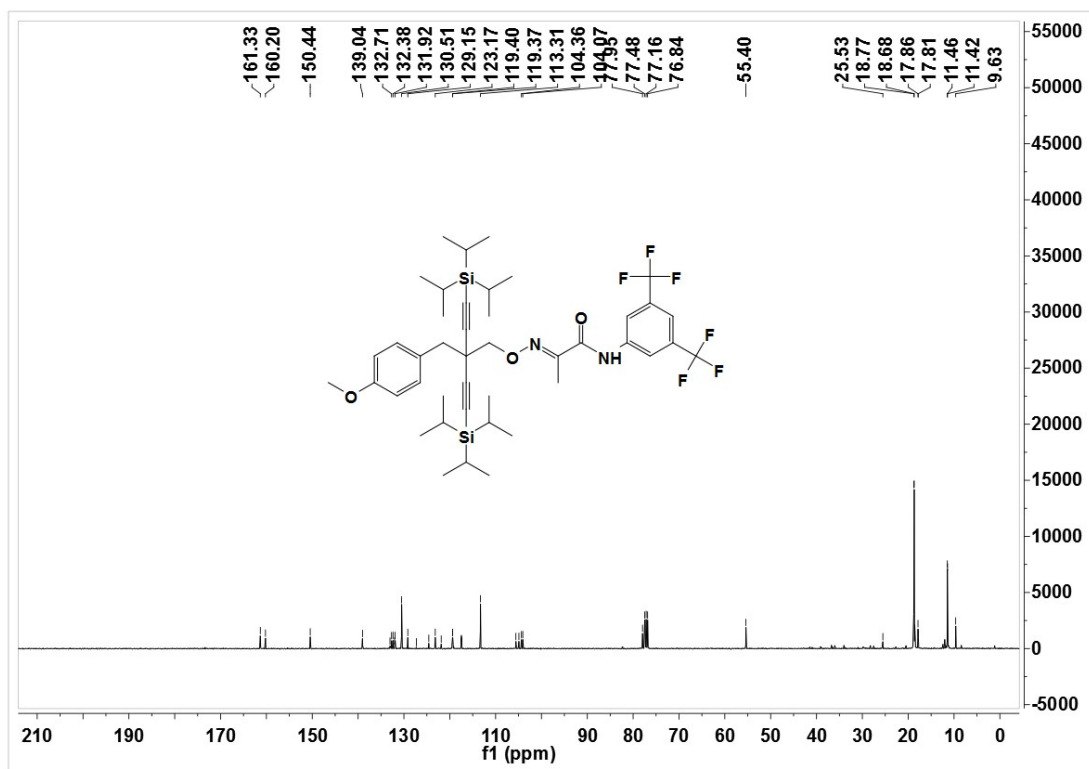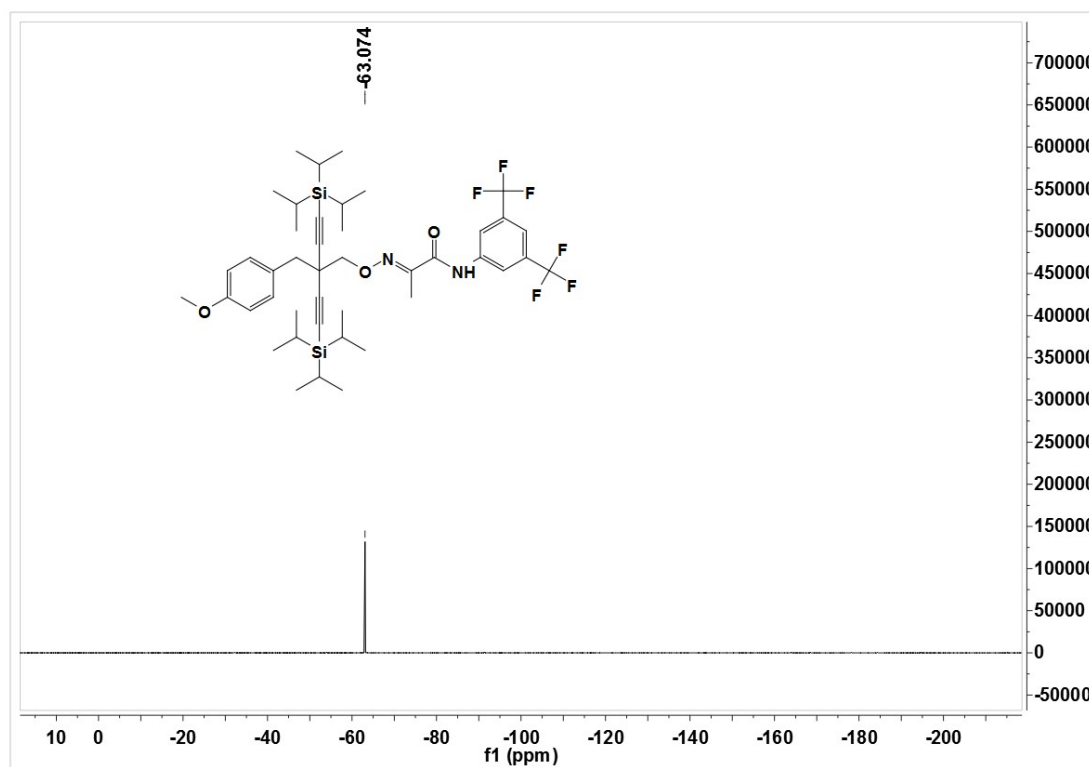

**(E)-2-(((2-(4-(Benzyloxy)benzyl)-4-(triisopropylsilyl)-2-((triisopropylsilyl)ethynyl)but-3-yn-1-yl)oxy)imino)-N-(3,5-bis(trifluoromethyl)phenyl)propanamide (10g)**

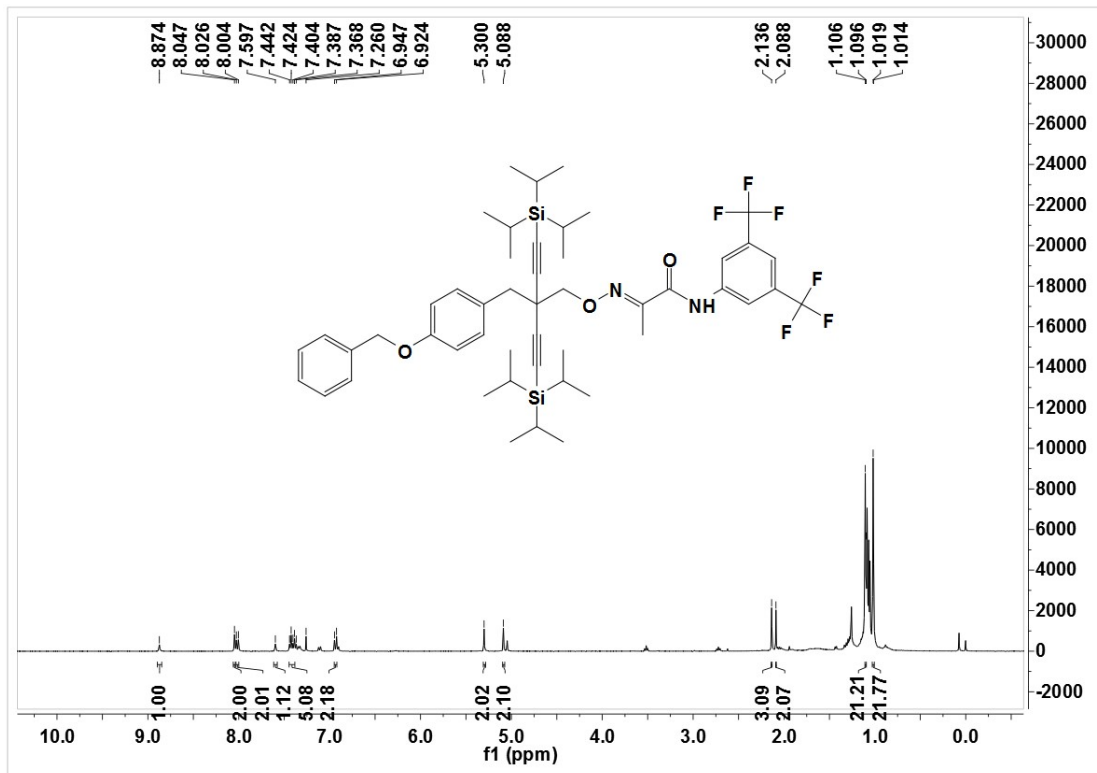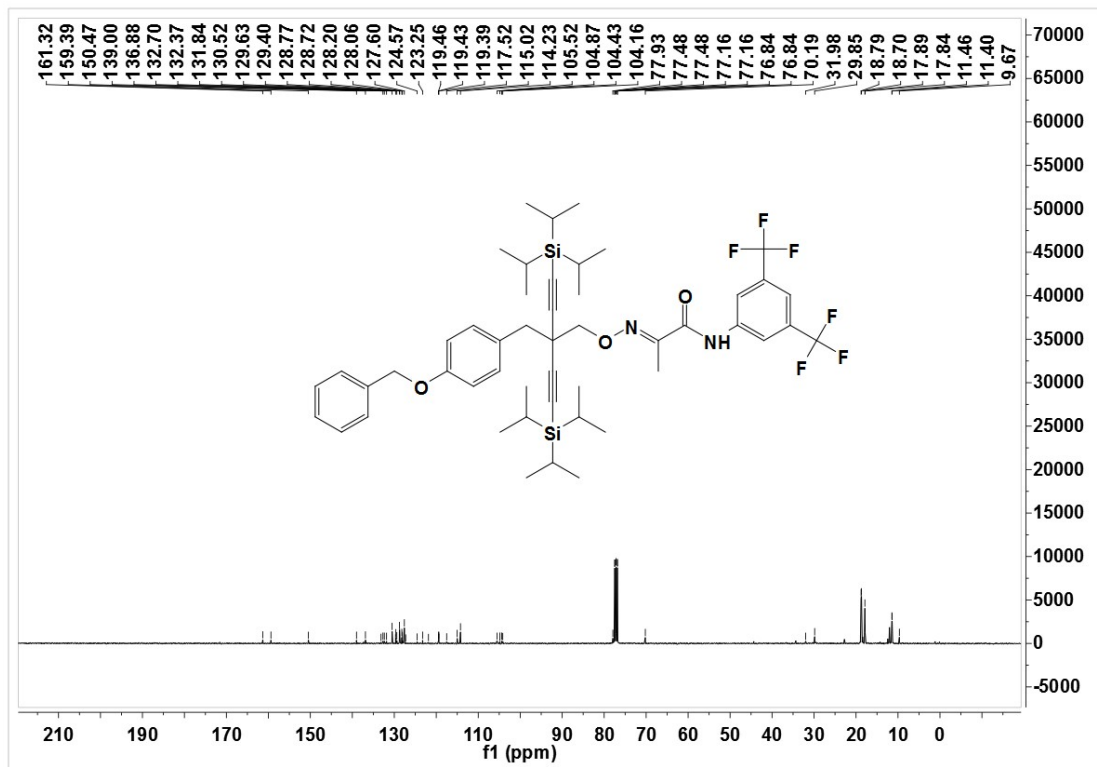



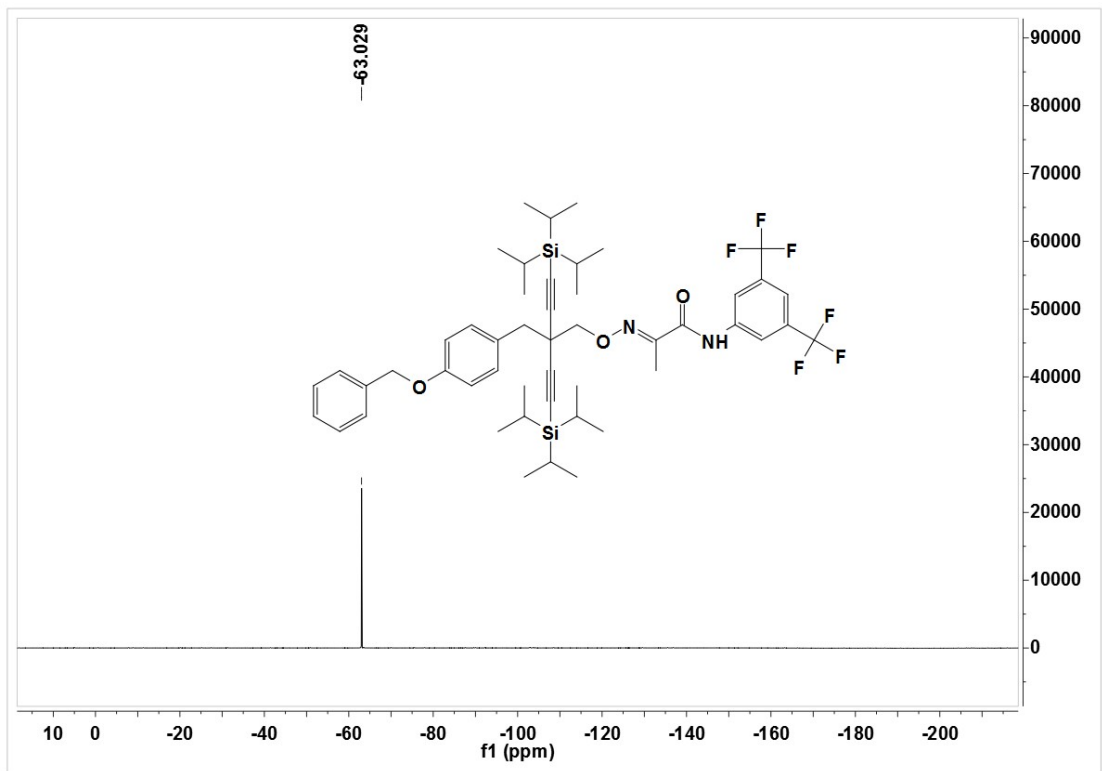

Supplement: d1qo01095f1.pdf [file d1qo01095f1.pdf]
